# Supplementary material for: DWORF Extends Life Span in a PLN-R14del Cardiomyopathy Mouse Model by Reducing Abnormal Sarcoplasmic Reticulum Clusters
Source: PubMed Central journal article supplement — Circ Res. 2023 Nov 13;133(12):1006–21. doi: 10.1161/CIRCRESAHA.123.323304 (PMC10699510; doi:10.1161/circresaha.123.323304), 2023-11-13
Supplement: res-133-1006-s002.pdf [file res-133-1006-s002.pdf]

1 **SUPPLEMENTAL MATERIAL**

2

3 **DWORF extends life span in a PLN-R14del cardiomyopathy mouse model by**  
4 **reducing abnormal sarcoplasmic reticulum clusters**

5

6 **Nienke M. Stege, MSc <sup>1</sup>; Tim R. Eijgenraam, PhD <sup>1</sup>; Vivian Oliveira Nunes Teixeira, PhD <sup>1</sup>; Anna**  
7 **M. Feringa, MSc <sup>1</sup>; Elisabeth M. Schouten, BSc <sup>1</sup>; Diederik W.D. Kuster, Asst. Prof <sup>2,3</sup>; Jolanda van**  
8 **der Velden, Prof <sup>2,3</sup>; Anouk H.G. Wolters, BSc <sup>4</sup>; Ben N.G. Giepmans, Assoc. Prof <sup>4</sup>; Catherine A.**  
9 **Makarewich, Asst. Prof <sup>5,6</sup>, Rhonda Bassel-Duby, Prof <sup>7</sup>; Eric N. Olson, Prof <sup>7</sup>; Rudolf A. de Boer,**  
10 **Prof <sup>1,8</sup>; Herman H. W. Silljé, Assoc. Prof <sup>1\*</sup>.**

11

12 <sup>1</sup> Department of Cardiology, University Medical Center Groningen, University of Groningen, Groningen, The Netherlands; <sup>2</sup>  
13 Department of Physiology, Amsterdam UMC location Vrije Universiteit Amsterdam, The Netherlands. <sup>3</sup> Amsterdam Cardiovascular  
14 Sciences, Heart failure & arrhythmias, Amsterdam UMC, location Vrije Universiteit Amsterdam, Amsterdam, The Netherlands. <sup>4</sup>  
15 Biomedical Sciences of Cells & Systems, UMC Groningen, University of Groningen, Groningen, The Netherlands; <sup>5</sup> Division of  
16 Molecular Cardiovascular Biology of the Heart Institute, Cincinnati Children's Hospital Medical Center; <sup>6</sup> Department of Pediatrics,  
17 University of Cincinnati College of Medicine, Cincinnati, OH, USA; <sup>7</sup> Department of Molecular Biology and Hamon Center for  
18 Regenerative Science and Medicine, University of Texas Southwestern Medical Center, Dallas, TX, USA. <sup>8</sup> Department of  
19 Cardiology, Erasmus University Medical Center, Rotterdam, The Netherlands.

20 Correspondence to: Herman H. W. Silljé, Assoc. Prof. Email: h.h.w.sillje@umcg.nl

## 145 **Supplementary methods**

146

### 147 **Animals**

148 Mice were housed in a cage with wood chips bedding, on a 12 h light/12 h dark cycle with ad  
149 libitum access to standard mouse chow (ssniff®) and water. The PLN-R14<sup>Δ/Δ</sup> mouse model  
150 (C57BL/6J background) has been extensively described previously <sup>12</sup>. The DWORF transgenic  
151 (Tg) mouse line 1 (C57BL/6J background) with cardiac-specific DWORF overexpression, has  
152 been described previously <sup>14</sup>. Genotyping of the mice was performed according to the methods  
153 described in the original articles of both mouse lines. To compare the reduction of DWORF  
154 gene expression in general heart failure (HF) to PLN-R14del cardiomyopathy, left ventricular  
155 (LV) tissues from mice that underwent ischemia/reperfusion (I/R; temporal ligation of the left  
156 anterior descending coronary artery (LAD) for 60 minutes; n=8) injury or myocardial infarction  
157 (MI; permanent LAD ligation; n=9) were included as ischemic HF samples together with mice  
158 that underwent sham treatment (n=7) as corresponding controls (samples from Du et al. <sup>19</sup>).  
159 Minimal group sizes for all animal experiments were determined using power calculations with  
160 the significance level at 5% and power at 80%. Exclusion criteria set before the start of the  
161 study were the presence of the following genetic deviations: malocclusion/teeth overgrowth,  
162 hydrocephalus or growth retardation. However, mice did not have these genetic deviations,  
163 hence all mice with the correct genotypes were included in the study.

164

### 165 **Euthanasia**

166 Mice were euthanized either when the predetermined endpoint (an age of interest) was  
167 reached or, in case of survival studies, when mice reached the humane endpoint due to severe  
168 HF, which was evaluated in a blinded fashion (EF<10%, or strongly reduced activity with clearly  
169 elevated respiration). Mice were anesthetized using a mixture of oxygen and isoflurane (2.5%).  
170 The abdomen and thoracic cavity were opened, the abdominal aorta was cut and the  
171 circulation was flushed with saline via the heart. Subsequently, the heart was excised and  
172 rinsed in ice-cold 1 M potassium chloride (KCl) (Merck Millipore, Germany) solution. A

173 transverse mid-slice was taken for histological processing, several small pieces (1 mm<sup>3</sup>) from  
174 the left ventricle (LV) myocardium were collected for electron microscopy processing and the  
175 remaining LV tissue was snap-frozen in liquid nitrogen for molecular analysis.

176

## 177 **Patient Material**

178 Post-mortem end-stage HF formalin-fixed paraffin-embedded human cardiac tissue samples  
179 from PLN-R14del (n=5) and non-PLN-R14del DCM patients (n=5) were provided by the  
180 Pathology biobank from the University Medical Center of Groningen (UMCG). Material was  
181 acquired in accordance with international regulations and professional guidelines (the  
182 Declaration of Helsinki and the International Conference on Harmonization Guidelines for  
183 Good Clinical Practice). Material used in this project (RR#201800551) was obtained from  
184 anonymous excess material and the Institutional Review Board (IRB) of the UMCG approved  
185 the use of the tissues for explorative tissue-based studies. The medical ethics review board  
186 (Central Ethics Review Board non-WMO studies, UMCG) waives the need for approval if  
187 excess material is used, under the law in the Netherlands and waives the need for informed  
188 consent when patient anonymity is assured.

189

## 190 **Histological analysis**

191 To determine the degree of cardiac fibrosis, Masson's trichrome stain for collagen deposition  
192 detection was performed following standard procedures. The entire stained sections were  
193 imaged using a NanoZoomer 2.0-HT digital slide scanner (Hamamatsu Photonics, Japan).  
194 Subsequently the degree of fibrosis was quantified as a percentage of the entire section  
195 surface using the Positive Pixel Count v9 algorithm of Aperio's ImageScope software (version  
196 12.4.0; Leica Microsystems).

197

198 To determine the cell size of cardiomyocytes, fluorescein isothiocyanate (FITC)-conjugated  
199 wheat germ agglutinin (WGA; Sigma-Aldrich, MO, USA) was used to stain the extracellular  
200 matrix to visualize cell boundaries. The entire stained sections were imaged using an Olympus

201 VS200 ASW digital fluorescent slide scanner (Olympus - Life Science, Japan) at 40x  
202 magnification. QuPath Open Software for Bioimage Analysis (version 0.4.3) was used to  
203 measure the surface area of 30-50 transversally cut cardiomyocytes per mouse (n=4-5 mice  
204 per group per timepoint). Relative cardiomyocyte size is displayed as a fold change difference  
205 to age-matched WT controls.

206

207 To determine the abundance of PLN-containing protein clusters, immunofluorescent (IF)  
208 staining for PLN was performed using the 2D12 anti-PLN antibody (Invitrogen, CA, USA). This  
209 antibody has successfully been used to visualize normally distributed PLN and aggregated  
210 PLN clusters in patients and mice carrying the R14del deletion<sup>11,12,29</sup>. To prevent unspecific  
211 background staining from the secondary anti-mouse antibody, the primary anti-PLN antibody  
212 was labeled with Alexa Fluor 555 (red) using an APEX antibody labeling kit (Invitrogen). In  
213 addition, the extracellular matrix was stained green in these tissue sections using WGA and  
214 nuclei were stained blue with 4',6-diamidino-2-phenylindole (DAPI; Vector Laboratories, CA,  
215 USA). For the counting of PLN cluster positive cells, 2 representative images of longitudinal  
216 sectioned cardiomyocytes were taken at 10x magnification (Leica AF6000 fluorescence  
217 imaging system, Leica Microsystems) via a blinded procedure performed by an unbiased  
218 person. Counts were corrected for selected surface area measured by ImageJ software  
219 (National Institutes of Health, MD, USA) and averaged per mouse. Data is presented as cluster  
220 positive cells per 0.1 mm<sup>2</sup>. For determination of percentage cells with and without PLN stained  
221 speckles or clusters, stained sections were imaged using an Olympus VS200 ASW digital  
222 fluorescent slide scanner at 40x magnification. Longitudinal sectioned cardiomyocytes were  
223 counted and clusters were arbitrarily defined as any densely stained PLN structures with a  
224 radius above 1,8 µm and speckles with diameters below this size, although in reality these  
225 form a continuum. The abundance of p62 positive cardiomyocytes was determined. Cardiac  
226 tissue sections were stained with Alexa Fluor 488 (green) labeled (Invitrogen APEX antibody  
227 labeling kit) anti-p62 antibody (ab56416, Abcam) and anti-cardiac troponin I (troponin,  
228 ab47003, Abcam) with secondary antibody donkey anti-rabbit Alexa Fluor™ 555 (A31572,



229 Invitrogen) and DAPI. The entire stained sections were imaged using an Olympus VS200 ASW  
230 digital fluorescent slide scanner at 40x magnification. OlyVIA image viewer software (version  
231 3.3, Olympus Soft Imaging Solutions GmbH, Germany) was used to view the images and count  
232 the number of p62+troponin-positive cardiomyocytes within a selected and subsequently  
233 measured surface area. Data is presented as cluster positive cells per 0.1 mm<sup>2</sup>. In addition the  
234 number of longitudinal cardiomyocytes positive for p62, but negative for troponin, were counted  
235 within the cardiac section as an indication for the number of death cells.

236

237 To show the localization of PLN and other S/ER proteins in mouse cardiac tissue samples, IF  
238 staining was performed. The anti-PLN antibody (clone 2D12, Invitrogen) was used together  
239 with anti-SERCA2 (MA3-919, ThermoFisher), anti-histidine-rich calcium binding protein (HRC,  
240 HPA004833, Merck, Germany), anti-calnexin (ab22595, Abcam, UK) or anti-atlastin-3 (ATL3,  
241 16921-1-AP-s, Proteintech, UK) anti-cardiac troponin I (troponin, ab47003, Abcam), anti-  
242 Tom20 (sc-11415, Santa Cruz). Since the host of the anti-PLN antibody is mouse, the antibody  
243 was labeled using the APEX™ Alexa Fluor™ 488 Antibody Labeling Kit (A10468, Invitrogen).  
244 For HRC, calnexin, ATL-3, troponin and Tom20 a secondary donkey anti-rabbit Alexa Fluor™  
245 555 (A31572, Invitrogen) was used. To amplify the signal of anti-SERCA antibody, which was  
246 generated in mouse, the antibody was labeled using the APEX™ Biotin-XX Antibody Labeling  
247 Kit (A10495, Invitrogen) and a secondary Streptavidin Alexa Fluor™ 555 conjugate was used  
248 (S21381, Invitrogen). For the biotin-streptavidin-based staining, endogenous biotin and  
249 streptavidin were blocked before primary antibody incubation, using a blocking kit (E21390,  
250 Invitrogen). Mounting medium with DAPI was used to stain nuclei blue (ab104139, Abcam).

251 The same antibodies were used to show the localization of PLN and other S/ER proteins in  
252 post-mortem end-stage HF formalin-fixed paraffin-embedded human cardiac tissue samples  
253 from PLN-R14del and non-PLN-R14del DCM patients. Only if both antibodies were derived  
254 from the same host, antibodies were labeled using the APEX Alexa Fluor Labeling Kit.  
255 Otherwise, the secondary donkey anti-mouse Alexa Fluor™ 488 (A21202, Invitrogen) was  
256 used together with donkey anti-rabbit Alexa Fluor™ 555 (A31572, Invitrogen). The primary and

257 secondary antibodies that were used are presented in Table S1. Fluorescent imaging was  
258 performed using Leica DMI 8CS DLS confocal microscope (63x magnification, numerical  
259 aperture 1.4, pinhole 0.85) and deconvolution was performed with Imaris (version 9.7.2, non-  
260 iterative deconvolution algorithm).

261

262 Antibodies directed against ATL3, calnexin, HRC, p62 and SERCA were knockdown/knockout  
263 validated by the providing company. For the anti-troponin antibody, the company demonstrated  
264 cardiac positive and liver negative signal. For the anti-PLN antibody, cell treatment validation  
265 was performed by the providing company to ensure that the antibody binds to the antigen  
266 stated. Moreover, for all antibodies we confirmed that the staining pattern we observed when  
267 staining healthy cardiac tissue, corresponded to the staining patterns described in literature.  
268 In addition, secondary antibody only controls were used to distinguish genuine target staining  
269 from background staining.

270

### 271 **Quantitative polymerase chain reaction**

272 TRI Reagent (Sigma-Aldrich, MO, USA) was used to isolate RNA from powdered snap-frozen  
273 left ventricle (LV) tissues according to the manufacturer's protocol. Subsequently, cDNA  
274 synthesis was performed using the QuantiTect RT kit (Qiagen, Germany). Quantitative  
275 polymerase chain reaction (qPCR) was performed with iQ SYBR green supermix (Bio-Rad,  
276 CA, USA) and CFX384 Touch real-time PCR detection system (Bio-Rad) with recommended  
277 settings and protocol. CFX Manager software (version 3.0; Bio-Rad) was used for data  
278 processing. The exported values of the genes of interest were normalized to the expression  
279 level of housekeeping gene *Rplp0* (36B4) and these  $\Delta$ Ct values were presented as a fold  
280 change compared to the age-matched control group. Primer sequences are listed in Table S2.

281

282

283 **Western blot analysis**

284 The protein concentration was determined using a Pierce bicinchoninic acid (BCA) protein  
285 assay kit (Thermo Scientific, MA, USA). Protein samples were adjusted to a fixed concentration  
286 and prepared for Western blot. The samples were heated at 40°C for 10 minutes and 5µg of  
287 protein was loaded onto a sodium dodecyl sulphate-polyacrylamide gel electrophoresis (SDS-  
288 PAGE) system. Subsequently, the separated proteins were transferred onto an Immun-Blot  
289 polyvinylidene fluoride (PVDF) membrane using a semi-dry transfer system (Amersham  
290 Biosciences, UK). The membranes were incubated with a primary antibody overnight at 4°C,  
291 followed by one hour of incubation at room temperature (RT) with a horseradish peroxide  
292 (HRP)-linked secondary antibody. Subsequently, detection was performed using Immobilon  
293 Classico Western HRP substrate (Merck Millipore) and an ImageQuant LAS 4000 digital  
294 imaging system (GE Healthcare, IL, USA).

295

296 **Evans blue staining**

297 To evaluate the occurrence of necrosis of cardiomyocytes in WT, R14<sup>ΔΔ</sup> and R14<sup>ΔΔ</sup>DWORF<sup>Tg</sup>  
298 mice, 100 µl of 16.7 mg/ml Evans Blue dissolved in 0.9% NaCl was administered to mice via  
299 intraperitoneal injection. After 24 hours, mice were euthanized under anesthesia (2.5% isoflurane  
300 mixed with oxygen) by flushing the circulation with saline via the heart and subsequent removal  
301 of the heart. The heart was rinsed in ice-cold 1 M KCl solution and a transverse mid-slice was  
302 taken and embedded in Tissue-Tek O.C.T. compound, after which the samples were frozen.  
303 Frozen tissue specimens were sectioned using a cryostat (4 µm), cardiac sections were fixed  
304 for 10 minutes in 4% buffered formaldehyde solution (4% formalin; Klinipath, the Netherlands),  
305 incubated with (FITC)-conjugated WGA for 30 minutes and mounted using mounting medium  
306 with DAPI. The entire stained sections were imaged using an Olympus VS200 ASW digital  
307 fluorescent slide scanner at 40x magnification (Evans Blue staining was detected using  
308 excitation at 632 nm and emission at 647 nm). OlyVIA image viewer software was used to view  
309 the images, to export the acquired virtual digital slides and to count the number of Evans Blue

310 positive cardiomyocytes within a selected and subsequently measured surface area. Data is  
311 presented as Evans Blue positive cells per 0.1 mm<sup>2</sup>.

312

### 313 **Calcium transient and contraction measurements in isolated adult mouse** 314 **cardiomyocytes**

315 Cardiomyocyte isolation was performed protocol of Ackers-Johnson et al.<sup>22</sup>. In brief, mice were  
316 anesthetized and the descending aorta was cut. Subsequently, the heart was flushed by  
317 injection of 7 mL EDTA buffer (130 mmol/l NaCl, 5 mmol/l KCl, 0.5 mmol/l NaH<sub>2</sub>PO<sub>4</sub>, 10 mmol/l  
318 HEPES, 10 mmol/l glucose, 10 mmol/l BDM, 10 mmol/l taurine, 5 mmol/l EDTA, pH 7.8) into  
319 the right ventricle. The ascending aorta was clamped, the heart was excised and transferred  
320 to a dish with fresh EDTA buffer. By sequential injection of 10 mL EDTA buffer, 3 mL perfusion  
321 buffer (130 mmol/l NaCl, 5 mmol/l KCl, 0.5 mmol/l NaH<sub>2</sub>PO<sub>4</sub>, 10 mmol/l HEPES, 10 mmol/l  
322 glucose, 10 mmol/l BDM, 10 mmol/l taurine, 1 mmol/l MgCl<sub>2</sub>, pH 7.8) and 30 to 50 mL  
323 collagenase buffer (0.5 mg/ml collagenase 2, 0.5 mg/ml collagenase 4, 0.05 mg/ml protease  
324 XIV) into the LV, digestion was accomplished. Tissue was gently pulled into 1-mm pieces using  
325 forceps and cellular dissociation was completed by gentle trituration using a wide bore pipette  
326 tip. Enzyme activity was inhibited by adding 5 mL stop buffer (perfusion buffer containing 5%  
327 fetal calf serum), after which cell suspension was passed through a 100- $\mu$ m filter. Calcium  
328 concentration was gradually restored to physiological levels by 4 sequential rounds of gravity  
329 settling, using 3 intermediate calcium reintroduction buffers and a highly pure cardiomyocyte  
330 fraction was obtained. Medium was replaced by Tyrode solution (134 mM NaCl, 5 mM KCl, 5  
331 mM sodium pyruvate, 12 mM HEPES, 1.2 mM MgSO<sub>4</sub>, 1.2 mM NaH<sub>2</sub>PO<sub>4</sub>, 2 mM CaCl<sub>2</sub> and 11  
332 mM glucose, pH 7.4) for calcium transient and excitation-contraction coupling measurements.  
333 Cardiomyocytes (~50.000 cells) were loaded with Fura-2 (1  $\mu$ g/mL; F1221 Invitrogen™) using  
334 1X PowerLoad™ Concentrate (P10020 Invitrogen™) for 30 minutes at 25°C. After washing,  
335 plating and acclimatization of cells to 37°C, contraction was evoked via electrical field  
336 stimulation (IonOptix MyoPacer; 2 Hz, 4 ms pulse duration, 20 V). An IonOptix Calcium and

337 Contractility System (IonOptix corporation, Milton, MA, United States) was used to measure  
338 calcium transients and video-based sarcomere length (SL) at 250 Hz sampling frequency. Per  
339 mouse the process of loading and measuring cardiomyocytes was performed 2 sequential  
340 times. Each time ~10 cardiomyocytes (~20 cells per mouse) were imaged for ~15 contraction-  
341 relaxation cycles. Subsequently, isoproterenol was added to induce  $\beta$ -adrenergic stimulation  
342 (final concentration 100 nM, I6504 Sigma-Aldrich) and measurements were performed on ~5  
343 stimulated cardiomyocytes (~10 cells per mouse). We like to note that cardiomyocyte yield was  
344 much lower for R14 $\Delta\Delta$  mice at 6 weeks of age, indicative for a high vulnerability of these  
345 cardiomyocytes as compared to WT and R14 $\Delta\Delta$ DWORF<sup>Tg</sup> cardiomyocytes at this age.

346

### 347 **Electron microscopy**

348 LV myocardial tissue pieces were fixed in EM fixative (4% paraformaldehyde and 0.1%  
349 glutaraldehyde in 0.1M sodium cacodylate (pH 7.4)) overnight at 4°C. Subsequently EM  
350 fixative was diluted four times with 0.1M cacodylate buffer and samples were stored at 4°C for  
351 further processing. Post fixation was performed with 1% osmium tetroxide and 1.5% potassium  
352 ferrocyanide. Next, samples were dehydrated, embedded in EPON epoxy resin, and ultrathin  
353 sections (80 nm) were cut, collected on single slot nickel grid and contrasted using 4%  
354 neodymium acetate. For immunolabeling, samples were etched with 1% periodic acid for 10  
355 minutes, followed by a 30-minute blocking step using 1% bovine serum albumin (BSA;  
356 Sanquin, the Netherlands) in tris-buffered saline (TBS), pH 7.4. Next, PLN primary antibody  
357 (clone 2D12, Invitrogen, dilution 1:200) was incubated for 2 hours followed by washing and  
358 subsequent incubation for 1 hour with biotinylated horse anti-mouse secondary antibody  
359 (VEC.BA-2001, Vector Laboratories, dilution 1:400), followed by washing steps. Finally,  
360 streptavidin conjugate Qdot<sup>TM</sup> 655 (Q10123MP, Invitrogen, dilution 1:1000) was incubated for  
361 1 hour. Sections were imaged using scanning transmission electron microscopy (STEM) (Zeiss  
362 Supra55, Germany).

363

364

365 **Measurement of troponin in plasma**

366 To determine plasma cardiac troponin I levels, blood was collected via the descending aorta.  
367 Plasma was diluted 1:4 and using the Muscle Injury Panel 3 Mouse Kit (K15186C, Meso Scale  
368 Diagnostics, MD, USA) cardiac troponin I level (and skeletal troponin I as a control) was  
369 measured on the MESO QuickPlex SQ 120 instrument (Meso Scale Diagnostics). Analysis  
370 was performed using MSD Discovery Workbench 4.0 Analysis Software (Meso Scale  
371 Diagnostics). Values below the limit of detection are replaced by zero.

21 **Supplementary figures**

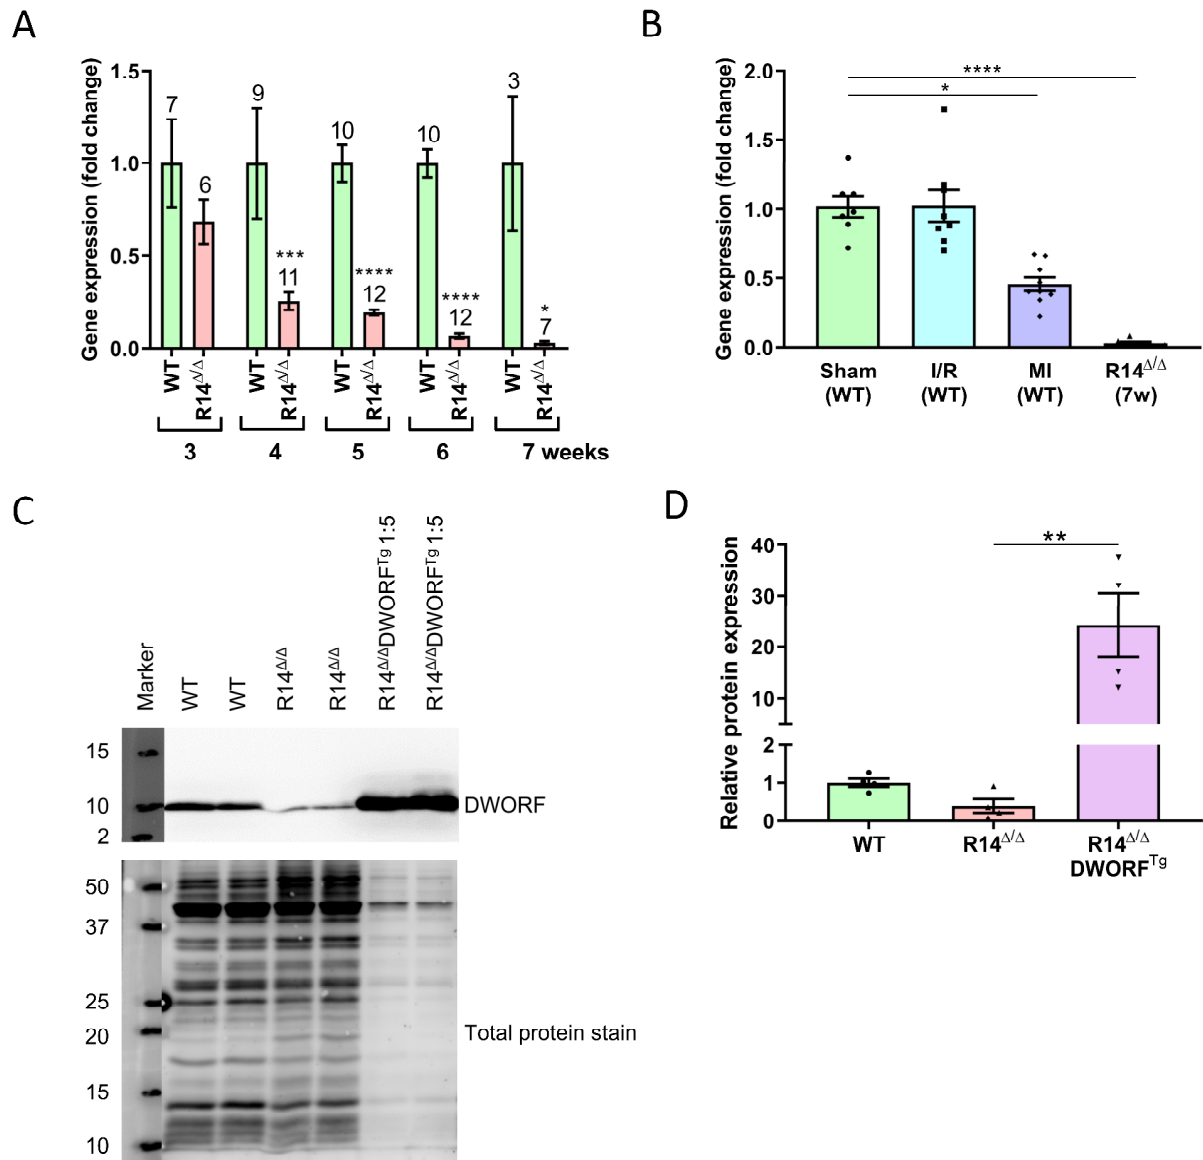

22  
 23 **Figure S1 Cardiac DWORF expression and overexpression in R14 $\Delta\Delta$  mice.** **A**, Relative cardiac  
 24 DWORF gene expression over time in 3- to 7-week-old R14 $\Delta\Delta$  mice, displayed as fold change difference  
 25 to age-matched WT controls. The numbers of mice used per group and timepoint are listed above each  
 26 bar. **B**, Relative cardiac DWORF gene expression in mice with myocardial ischemia reperfusion injury  
 27 (I/R), mice that underwent myocardial infarction (MI) and 7-week-old R14 $\Delta\Delta$  mice, displayed as a fold  
 28 change to WT sham mice (n=7-9). **C**, Representative (average-based) Western blot image of DWORF  
 29 protein levels in 7-week-old WT, R14 $\Delta\Delta$  and R14 $\Delta\Delta$ DWORF<sup>Tg</sup> mice (R14 $\Delta\Delta$ DWORF<sup>Tg</sup> is diluted 1:5 to  
 30 maintain linear range of chemiluminescent signal). **D**, Quantification of DWORF protein levels,  
 31 confirming DWORF overexpression in R14 $\Delta\Delta$ DWORF<sup>Tg</sup> mice (n=4 per group). \* P<0.05, \*\* P<0.01, \*\*\*  
 32 P<0.001, \*\*\*\* P<0.0001. Significance was examined by Kruskal-Wallis with Dunn's multiple  
 33 comparisons test, or the Mann-Whitney U test when two groups were compared.

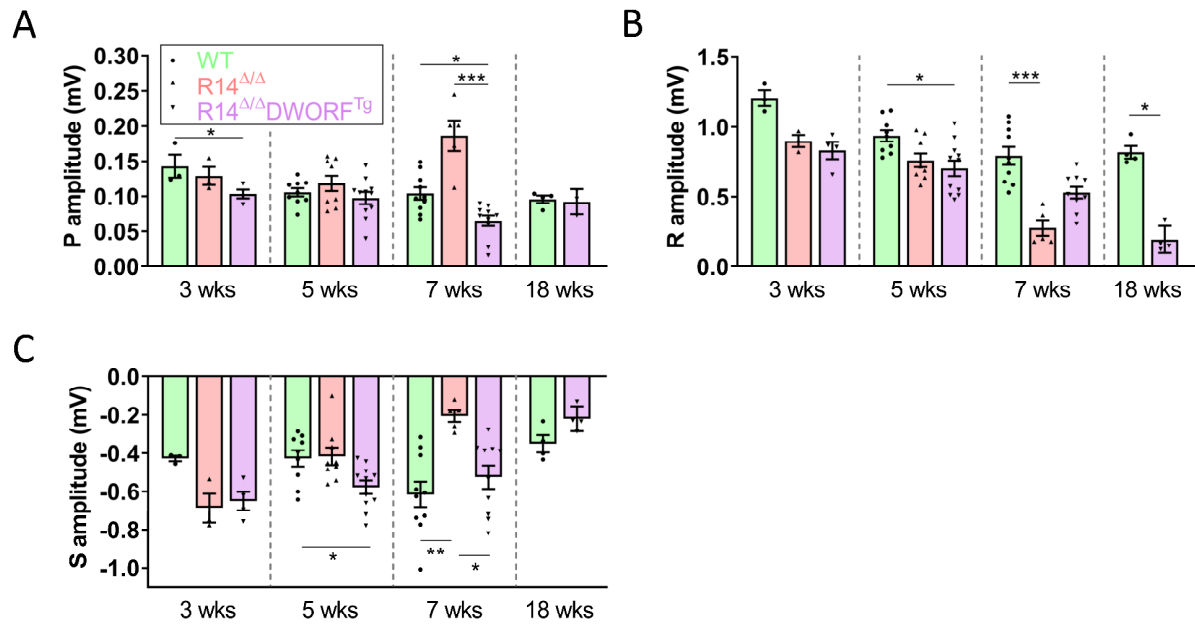

34  
 35 **Figure S2 Surface electrocardiography of WT, R14 $\Delta/\Delta$  and R14 $\Delta/\Delta$ DWORF<sup>Tg</sup> mice. (A-C) P, R and S**  
 36 **amplitudes of ECGs that are displayed in Figure 1G of 3- to 18-week-old R14 $\Delta/\Delta$ , R14 $\Delta/\Delta$ DWORF<sup>Tg</sup> and**  
 37 **WT control mice. (n=3-4 at 3 weeks, n=9-11 at 5 weeks, n=5-10 at 7 weeks, n=4 at 18 weeks). \* P<0.05,**  
 38 **\*\* P<0.01, \*\*\* P<0.001. Significant differences were examined by Kruskal-Wallis with Dunn's multiple**  
 39 **comparisons test, or the Mann-Whitney U test when only two groups were compared.**



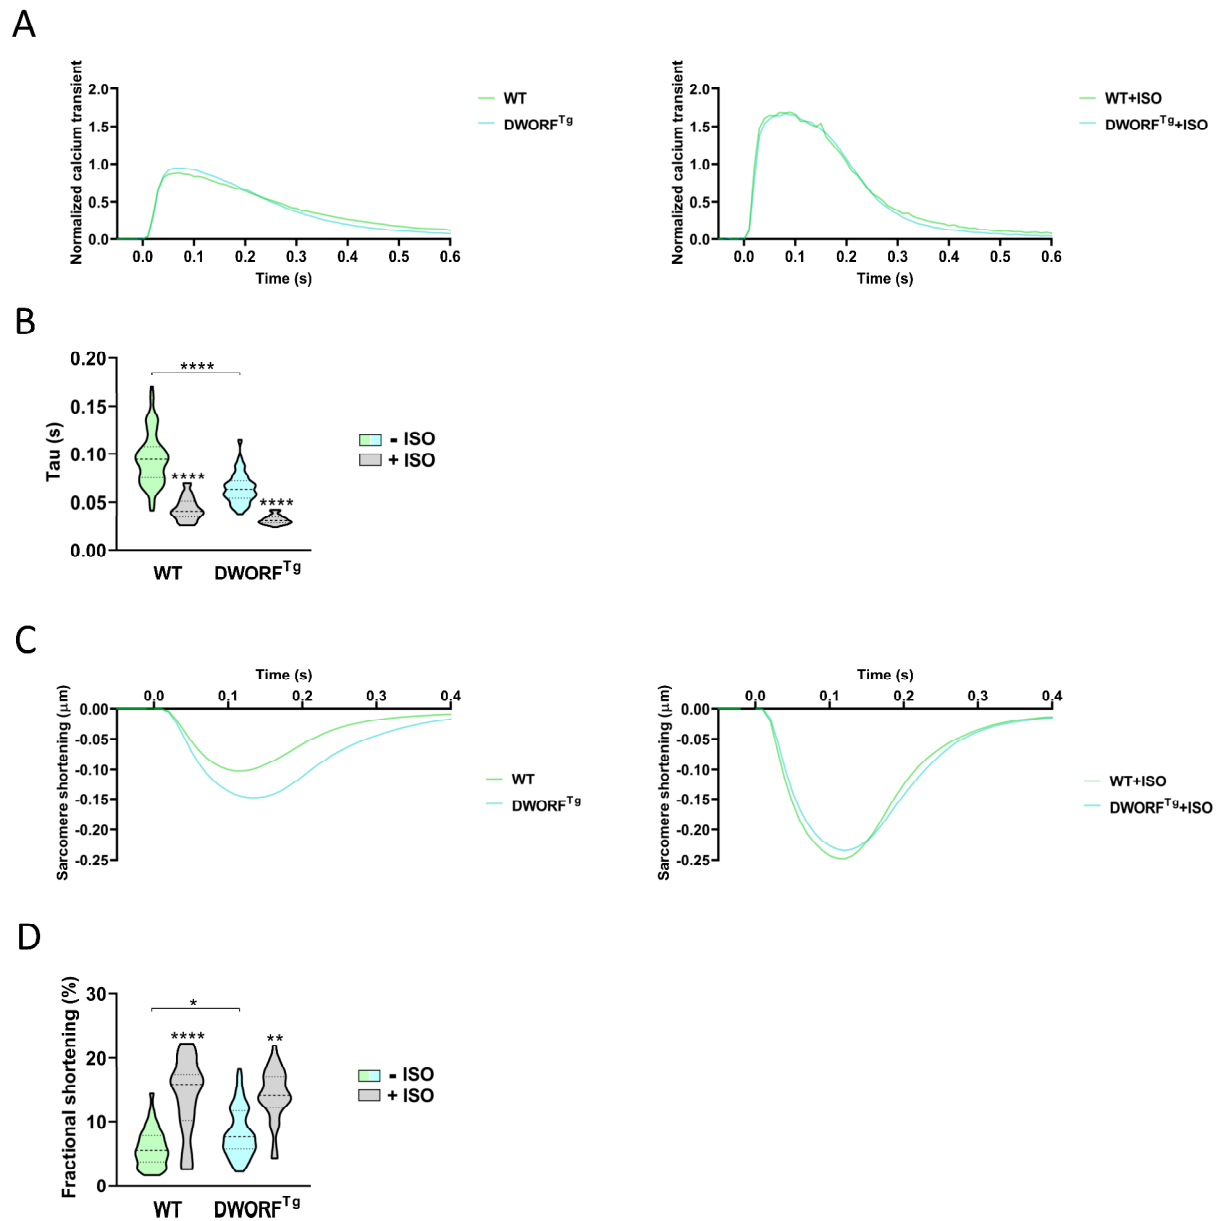

40

41 **Figure S3 Confirmation of calcium handling and sarcomere function data in isolated DWORF<sup>Tg</sup>**  
 42 **cardiomyocytes. A**, Normalized calcium transients under pacing-conditions with and without ISO  
 43 stimulation in isolated mouse cardiomyocytes from WT and DWORF<sup>Tg</sup> mice and **(B)** quantification of  
 44 Tau (-ISO: n = 60–100 cells from 4 mice per group, +ISO: n = 25–40 cells from 4 mice per group). **C**,  
 45 Normalized pacing-induced sarcomere contraction-relaxation curves with and without ISO stimulation  
 46 and **(D)** quantification of fractional shortening. ISO= isoproterenol, ISO condition was compared with the  
 47 untreated matched genotype. \* P<0.05, \*\* P<0.01, \*\*\*\* P<0.0001. Significance was examined by  
 48 Hierarchical cluster analysis using ANOVA with Bonferroni correction.

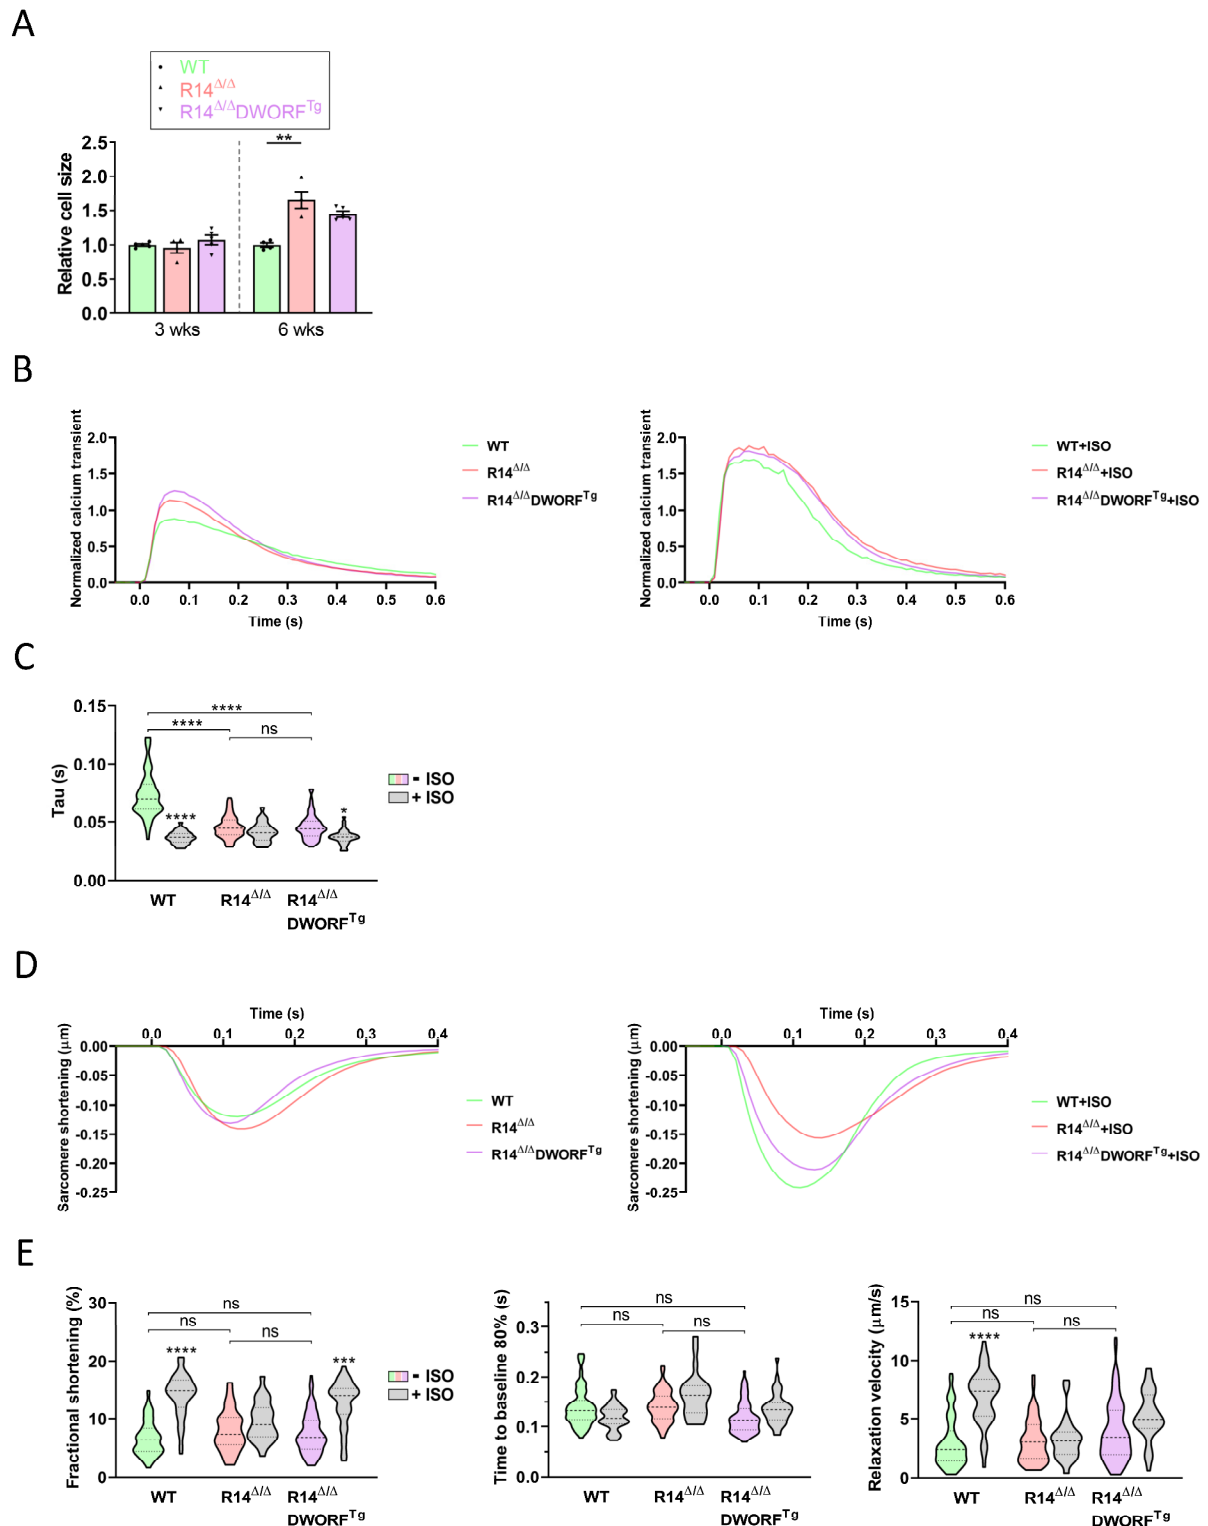

49

50

51

52

53

54

55

56

57

58

**Figure S4 Calcium handling and sarcomere function parameters in cardiomyocytes isolated from 6-weeks-old mice.** **A**, Relative cardiomyocyte size of WT, R14 $\Delta/\Delta$  and R14 $\Delta/\Delta$ DWORF<sup>Tg</sup> mice at about 3 or 6 weeks of age, displayed as a fold change difference to age-matched WT controls. **B**, Normalized calcium transients under pacing-conditions with and without ISO stimulation from isolated mouse cardiomyocytes of 6-week-old R14 $\Delta/\Delta$ , R14 $\Delta/\Delta$ DWORF<sup>Tg</sup> and WT control mice, and **(C)** the corresponding quantification of decay time constant (Tau). **D**, Normalized pacing-induced sarcomere contraction-relaxation curves with and without ISO stimulation, with quantification of **(E)** fractional shortening, time to reach 80% of the diastolic sarcomere length after systole and the relaxation velocity. Calcium and contraction measurements were simultaneously performed in isolated adult mouse cardiomyocytes from

59 6-week-old WT, R14<sup>Δ/Δ</sup> and R14<sup>Δ/Δ</sup>DWORF<sup>Tg</sup> mice (-ISO: n = 80–100 cells from 4 mice per group, +ISO:  
60 n = 30–40 cells from 3-4 mice per group). ISO= isoproterenol, ISO condition was compared with the  
61 untreated matched genotype. \* P<0.05, \*\* P<0.01, \*\*\* P<0.001, \*\*\*\* P<0.0001. Significance for cell size  
62 was examined by Kruskal-Wallis with Dunn's multiple comparisons test. Significance for calcium and  
63 sarcomere function parameters was examined by Hierarchical cluster analysis using ANOVA with  
64 Bonferroni correction.

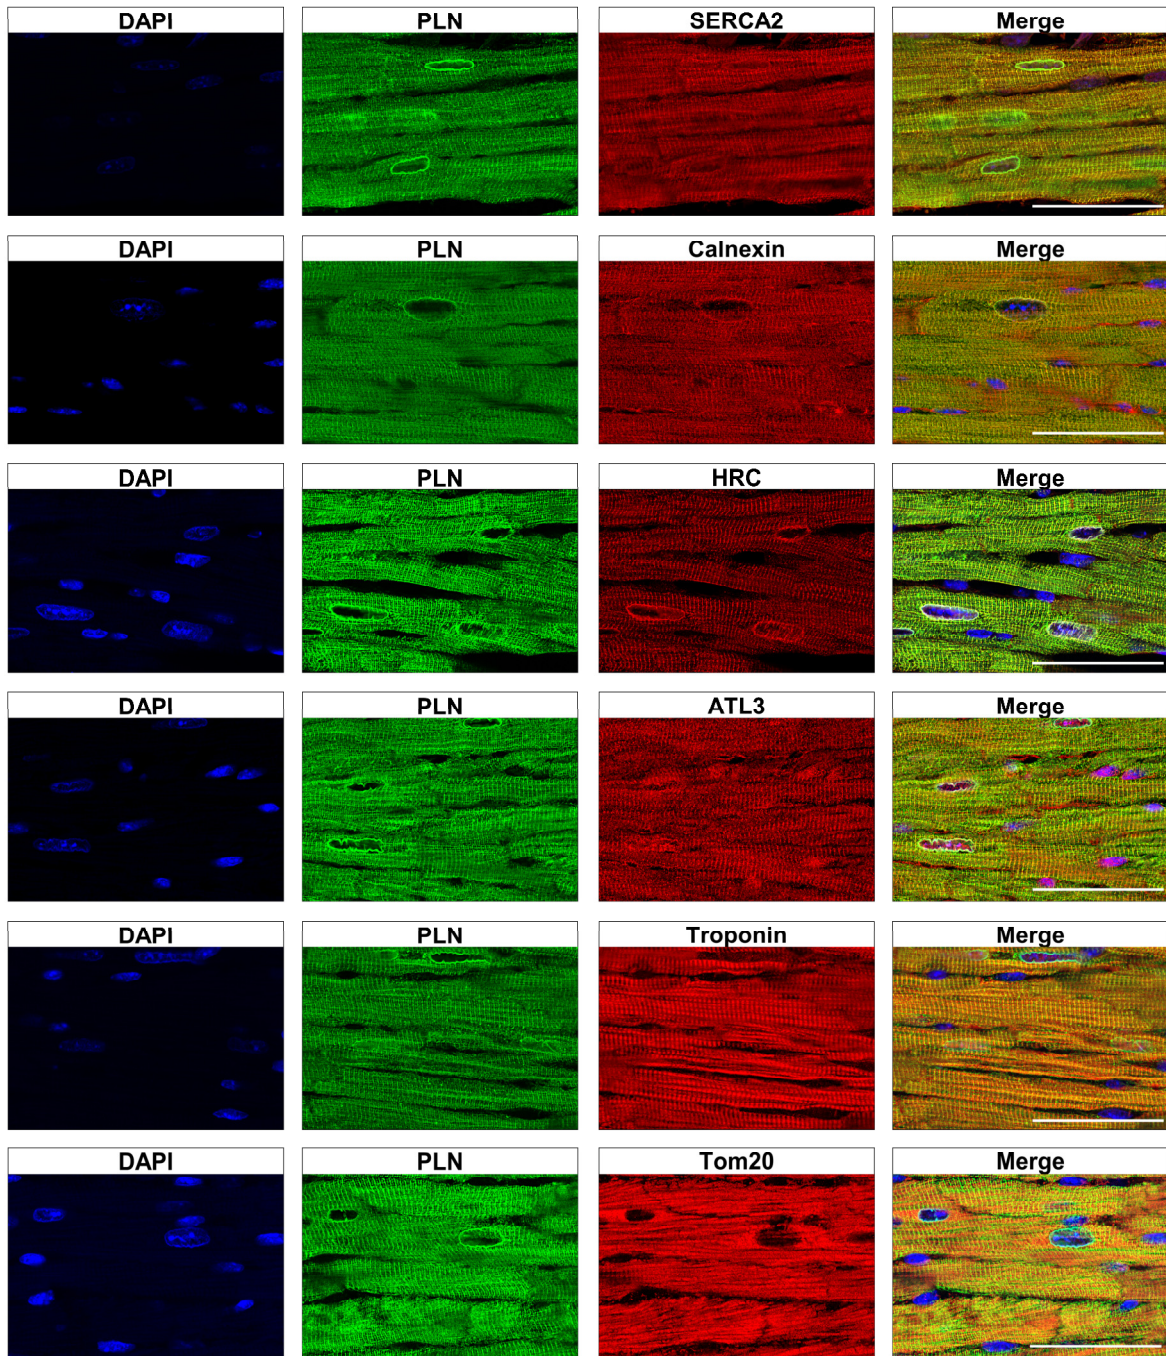

65  
66 **Figure S5** Representative (average-based) IF double staining for PLN together with SERCA2, calnexin,  
67 HRC, ATL3, troponin or Tom20 in LV tissue sections from 7-week-old WT mice (n=6; scale bar: 50  $\mu$ m).



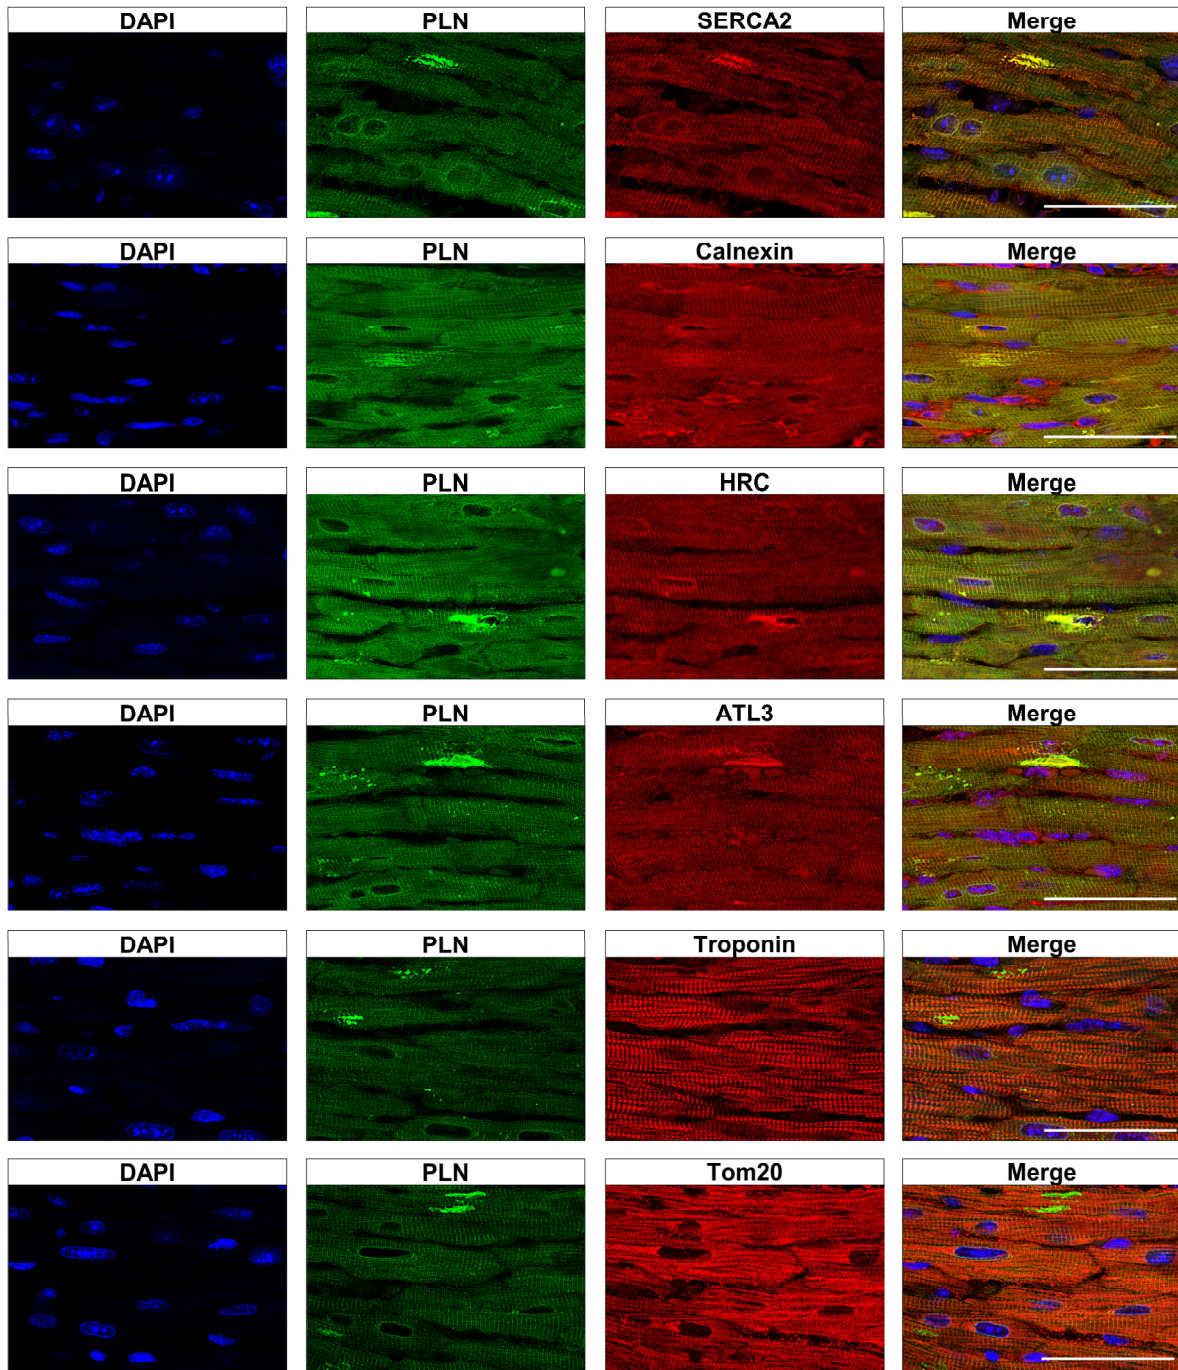

68  
69 **Figure S6** Representative (average-based) IF double staining for PLN together with SERCA2, calnexin,  
70 HRC, ATL3, troponin or Tom20 in LV tissue sections from 3-week-old R14<sup>ΔΔ</sup> mice (n=4; scale bar: 50  
71 μm).



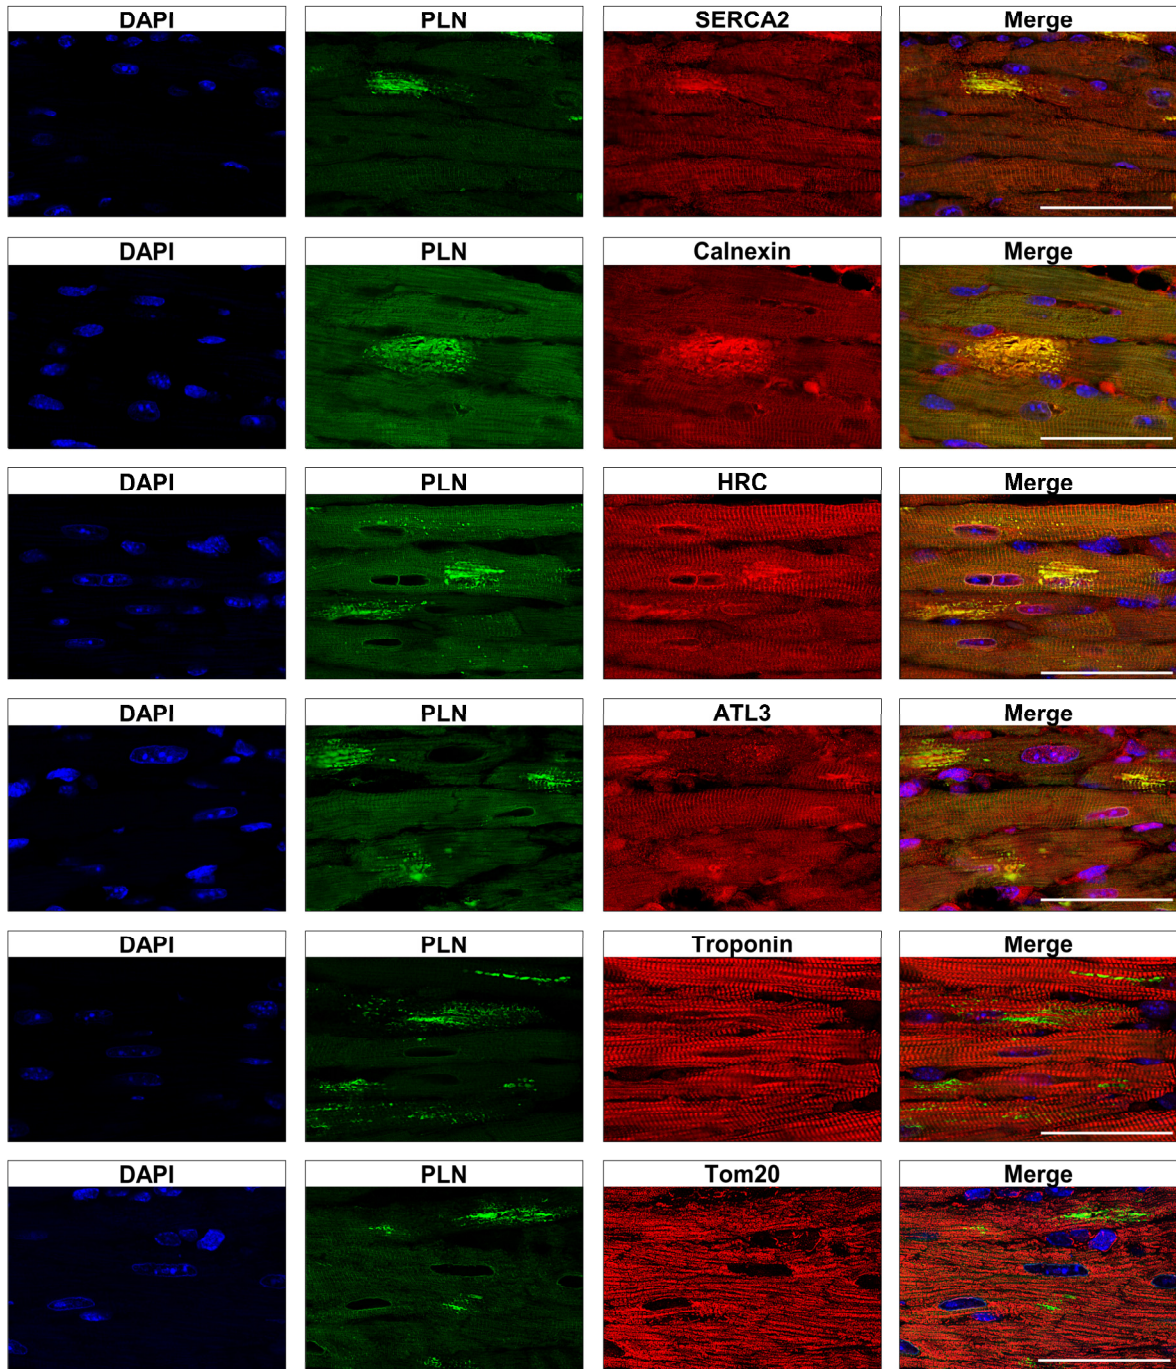

72  
 73 **Figure S7** Representative (average-based) IF double staining for PLN together with SERCA2, calnexin,  
 74 HRC, ATL3, troponin or Tom20 in LV tissue sections from 5-week-old R14 $\Delta\Delta$  mice (n=4; scale bar: 50  
 75  $\mu$ m).

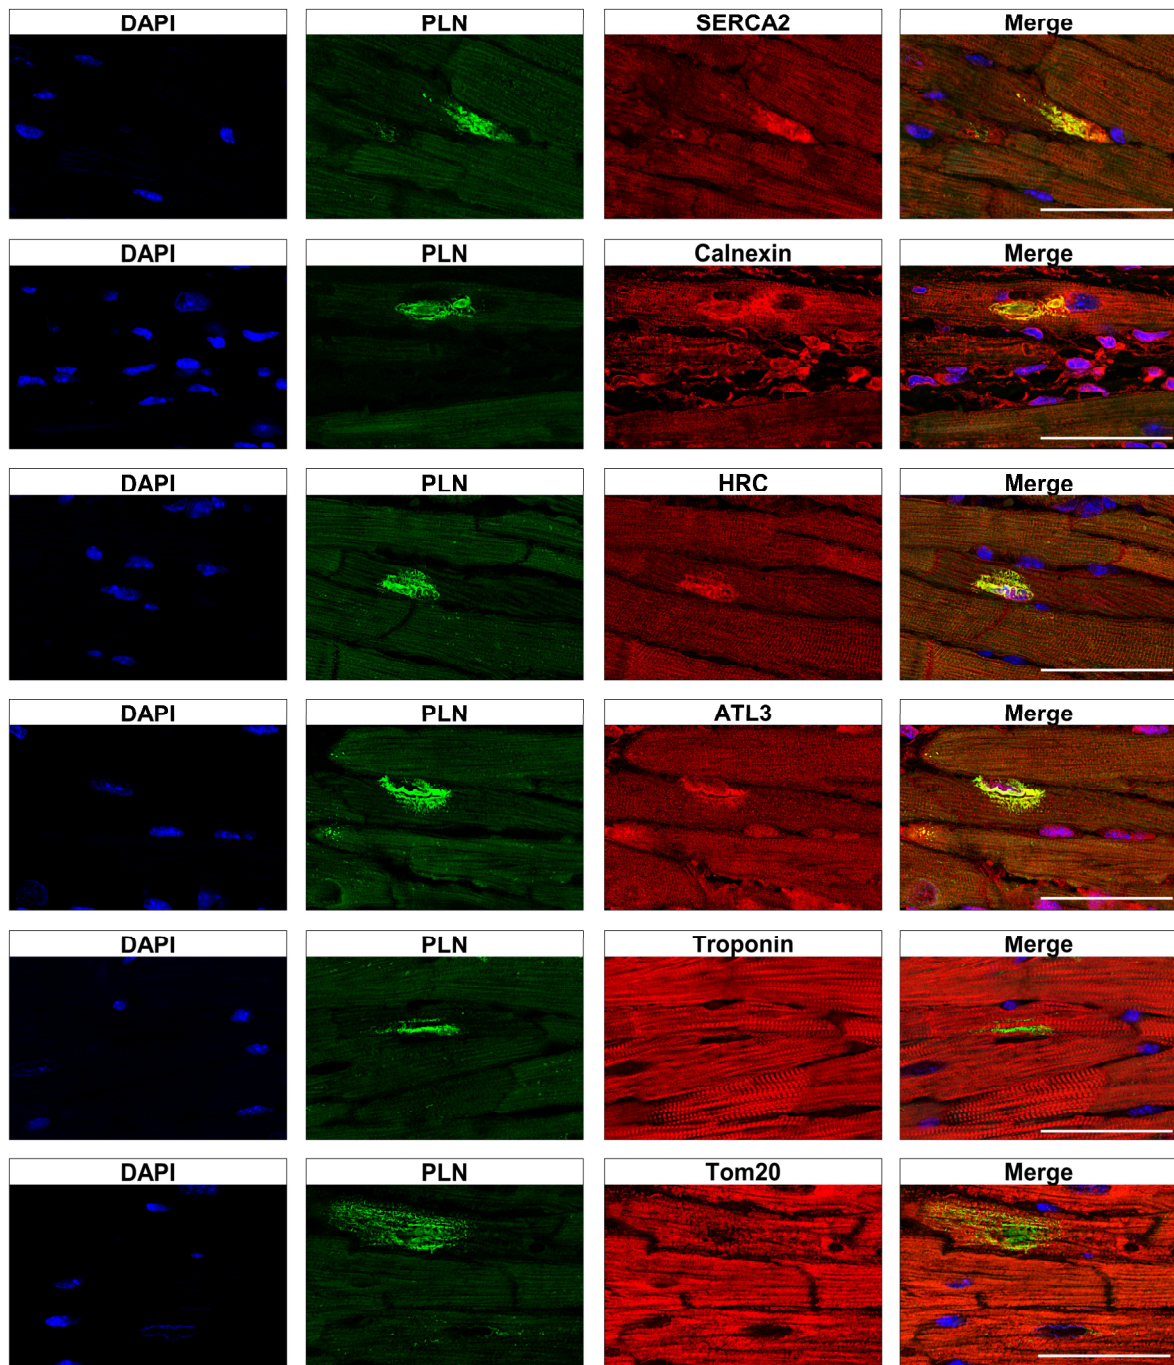

76  
 77 **Figure S8** Representative (average-based) IF double staining for PLN together with SERCA2, calnexin,  
 78 HRC, ATL3, troponin or Tom20 in LV tissue sections from 18-week-old R14<sup>ΔΔ</sup>DWORF<sup>Tg</sup> mice (n=5;  
 79 scale bar: 50 μm).



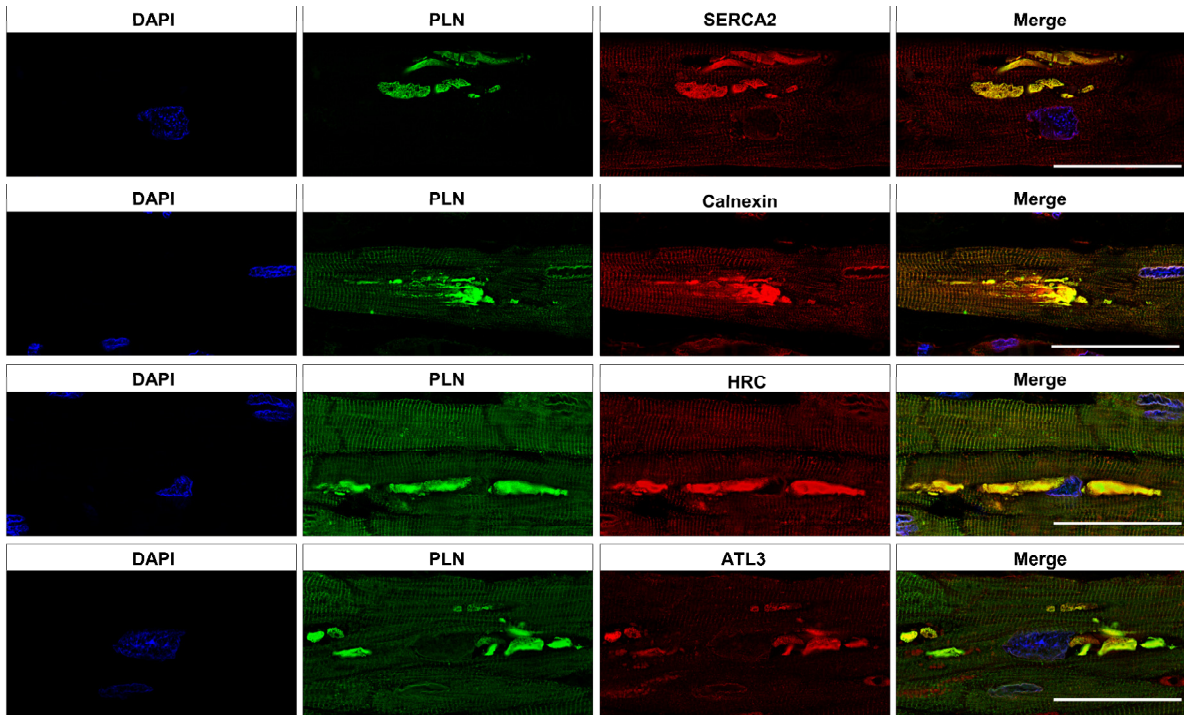

80  
 81 **Figure S9 Clustering of the S/ER in patients with PLN-R14del cardiomyopathy.** Representative  
 82 (average-based) IF double staining for PLN together with SERCA2, calnexin, HRC or ATL3 in LV tissue  
 83 sections from PLN patients (n=5; scale bar: 50  $\mu$ m).  
 84

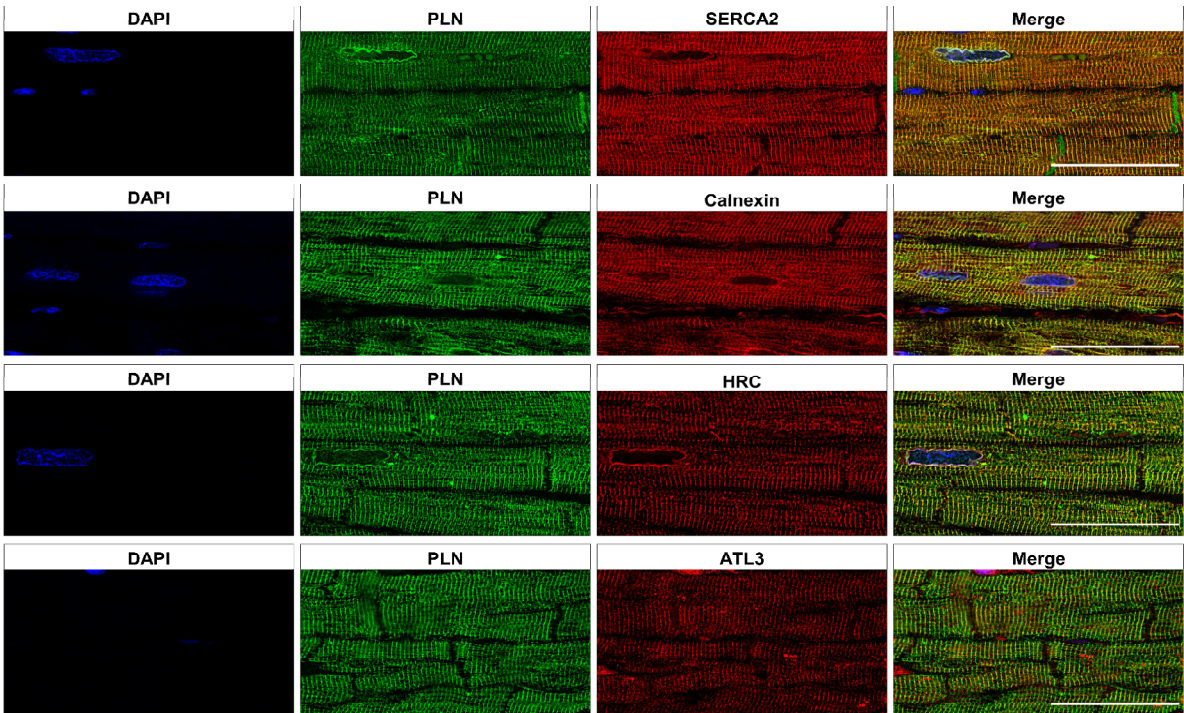

85  
 86 **Figure S10** Representative (average-based) IF double staining for PLN together with SERCA2,  
 87 calnexin, HRC or ATL3 in LV tissue sections from non-PLN-R14del DCM patients (n=5; scale bar: 50  
 88  $\mu$ m).



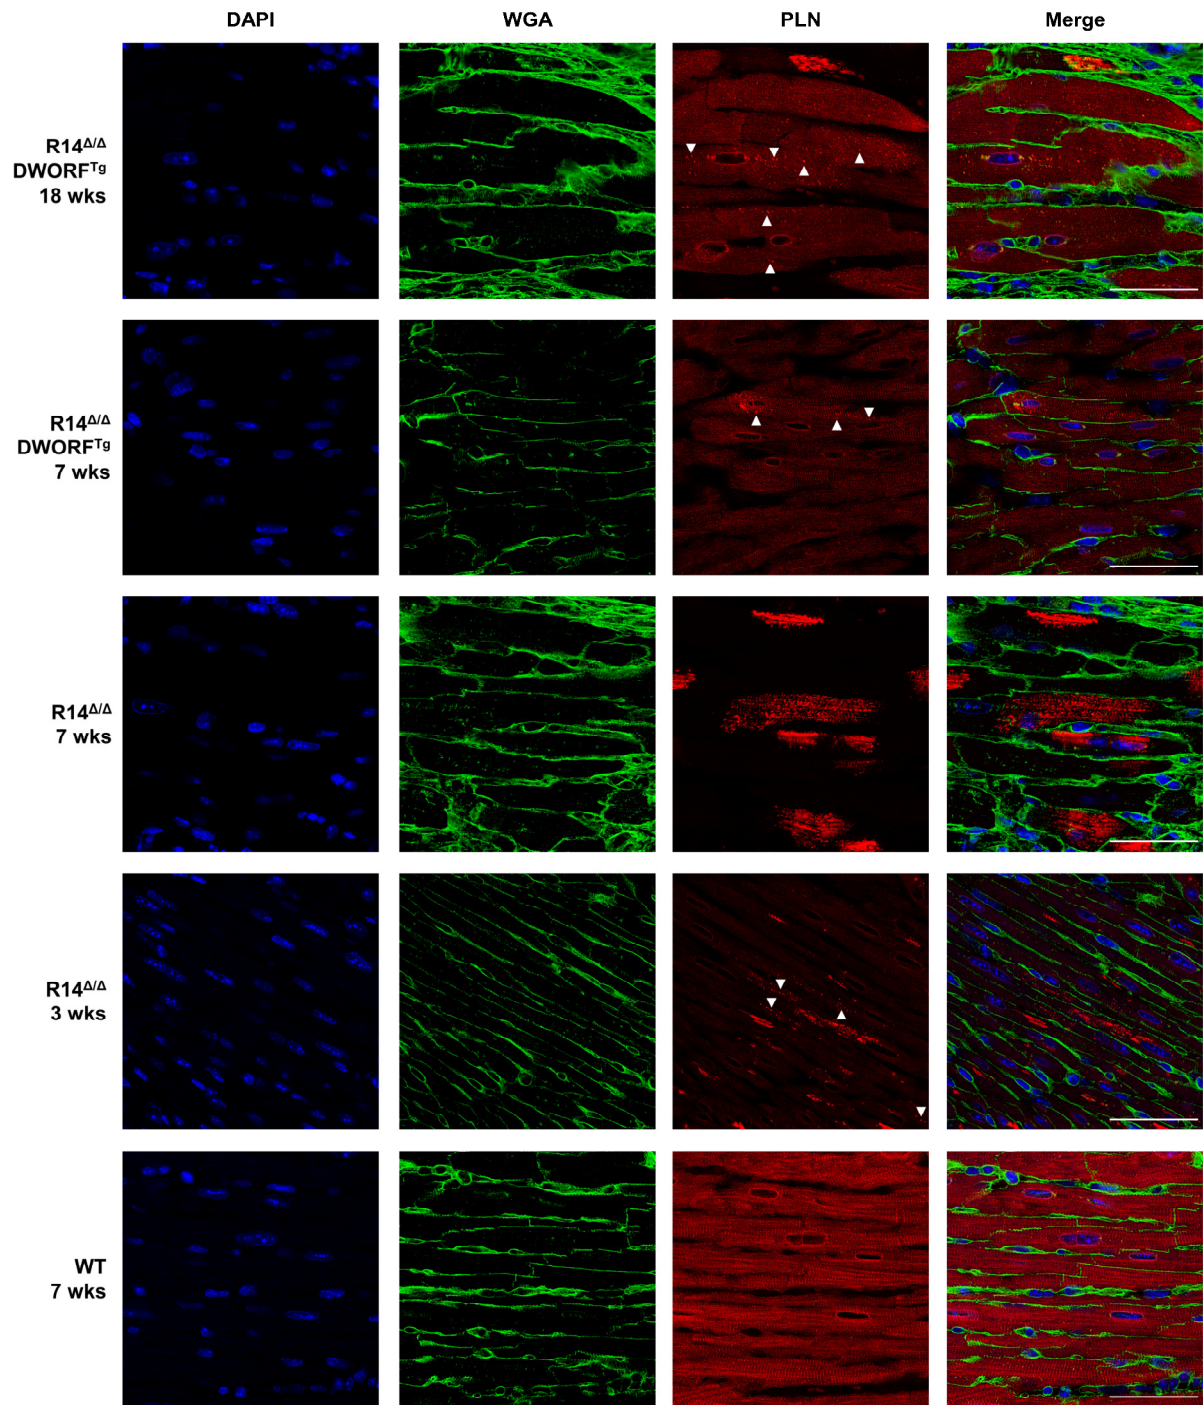

89  
90 **Figure S11 DWORF overexpression inhibits PLN cluster size increase.** Representative (average-  
91 based) IF double staining for PLN (red) together with together with WGA (green) and DAPI (blue) in LV  
92 tissue sections of 7- and 18-week-old R14<sup>Δ/Δ</sup>DWORF<sup>Tg</sup> mice, 3- and 7-week-old R14<sup>Δ/Δ</sup> mice and 7-  
93 week-old WT mice. White arrowheads emphasize small sized PLN clusters (n=5; scale bar: 50 μm).

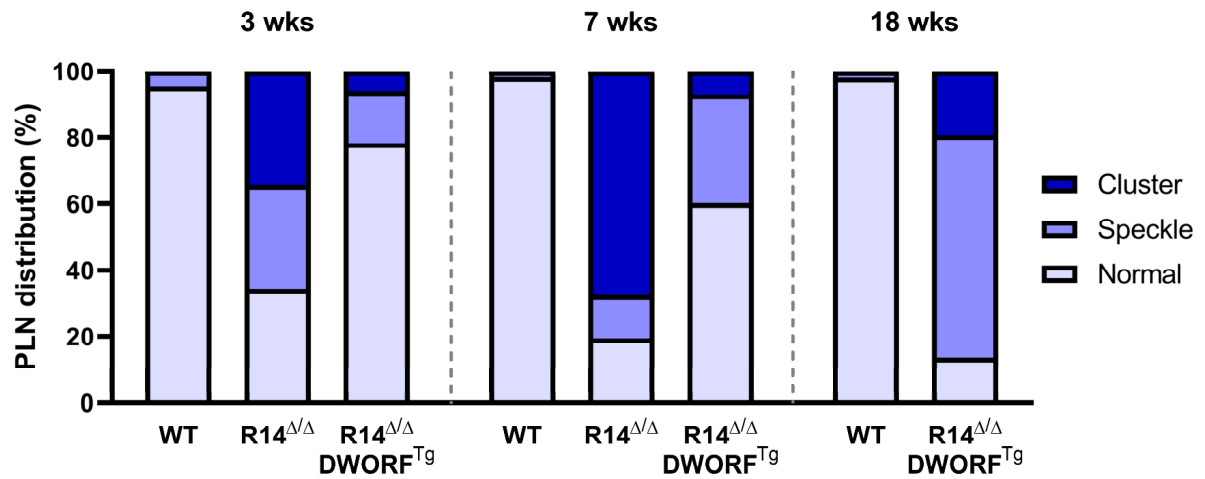

94 **Figure S12** PLN distribution quantified in WT, R14<sup>ΔΔ</sup> and R14<sup>ΔΔ</sup>DWORF<sup>Tg</sup> mice at 3, 7 and 18  
 95 **weeks of age.** Cardiomyocytes with normal, speckle and cluster PLN distribution were counted within  
 96 an area and are presented as a percentage of the total amount of cardiomyocytes counted (n=3-5 mice  
 97 per group and about 50 cells per mouse were counted), corresponding to representative IF staining from  
 98 figure S11.  
 99

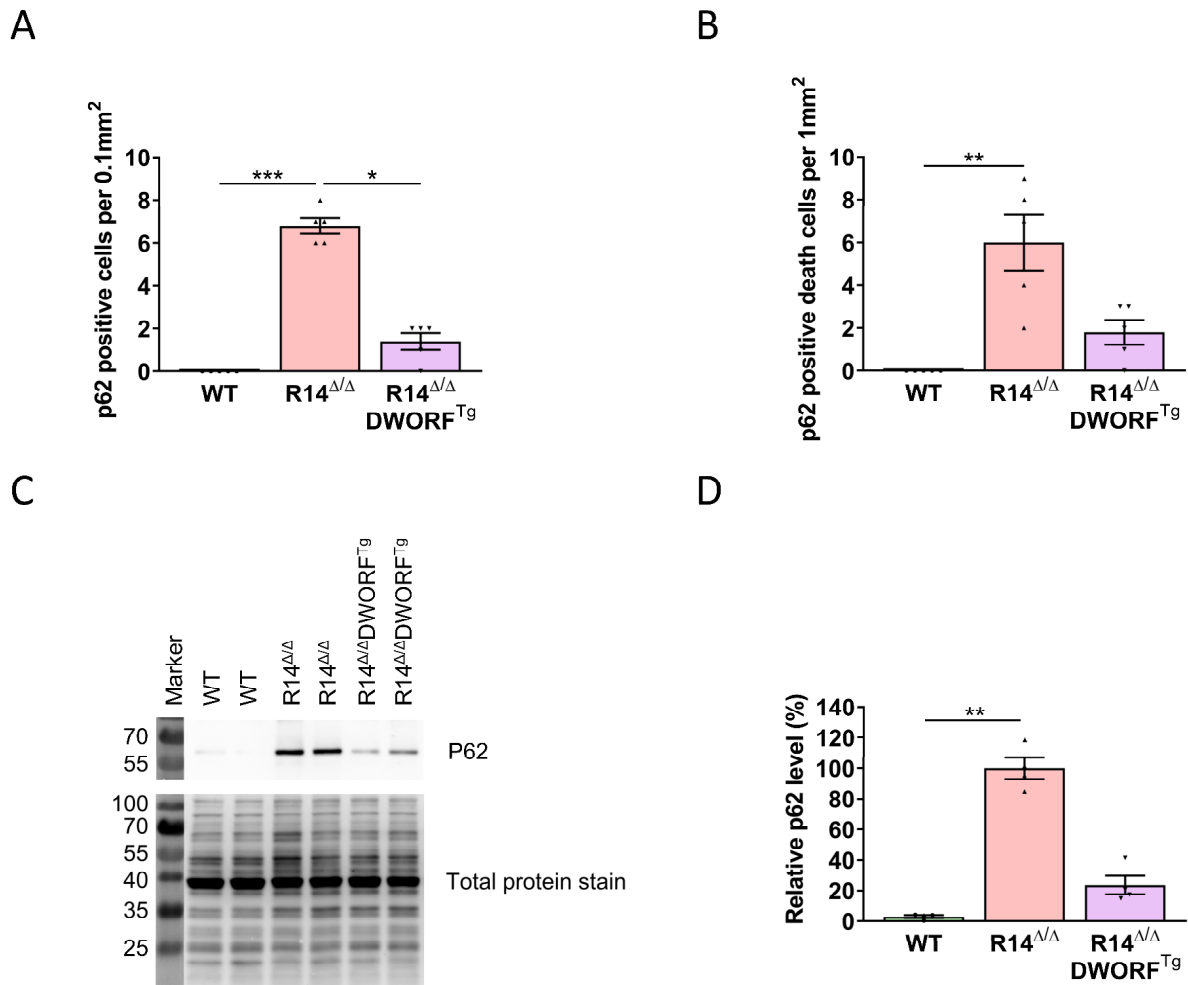

100  
 101 **Figure S13** Cardiomyocyte death quantified in R14<sup>Δ/Δ</sup> and R14<sup>Δ/Δ</sup>DWORF<sup>Tg</sup> mice at age 6 weeks.  
 102 **A**, P62 positive cardiomyocyte count per 0.1mm<sup>2</sup> at 6 weeks of age (n=5 per group), corresponding to  
 103 representative IF staining from figure 7A. **B**, P62 positive and troponin I negative cardiomyocyte count  
 104 per 1mm<sup>2</sup> at 6 weeks of age, indicative of cardiomyocyte death occurrence (n=5 per group).  
 105 corresponding to representative IF staining from figure 7B. **C**, Representative (average-based) Western  
 106 blot images of p62 protein levels in LVs of WT, R14<sup>Δ/Δ</sup> and R14<sup>Δ/Δ</sup>DWORF<sup>Tg</sup> mice at 7 weeks of age. **D**,  
 107 P62 level quantified and shown as a percentage with mean R14<sup>Δ/Δ</sup> levels set at 100% (n=4 per group).  
 108 \* P<0.05, \*\* P<0.01, \*\*\* P<0.001. Significance was examined by Kruskal-Wallis with Dunn's multiple  
 109 comparisons test.

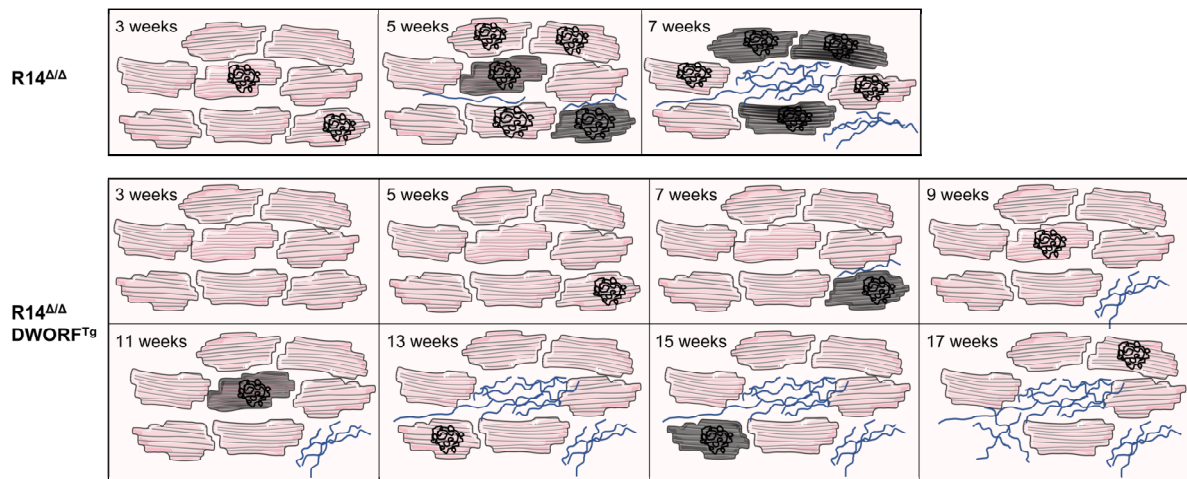

110  
 111  
 112  
 113  
 114  
 115  
 116  
 117  
 118  
 119

**Figure S14** Simplified schematic representation of the balance between PLN/SR cluster formation and cardiomyocyte death, accompanied by the formation of replacement fibrosis. PLN/SR clusters are illustrated by the black cluster structure, grey cardiomyocytes depict dying cells that will be cleared afterwards and replacement fibrosis is visualized by blue strands. This simplified figure explains the disease progression occurring in  $R14^{\Delta/\Delta}DWORF^{Tg}$  mice, despite the low number of cluster positive cardiomyocytes at any given time point and shows the comparison to the accelerated disease progression in  $R14^{\Delta/\Delta}$  mice. It also depicts both  $R14^{\Delta/\Delta}$  and  $R14^{\Delta/\Delta}DWORF^{Tg}$  mice having an equal amount of cardiac damage at end stage disease, but with a significant extension of life span by DWORF overexpression.

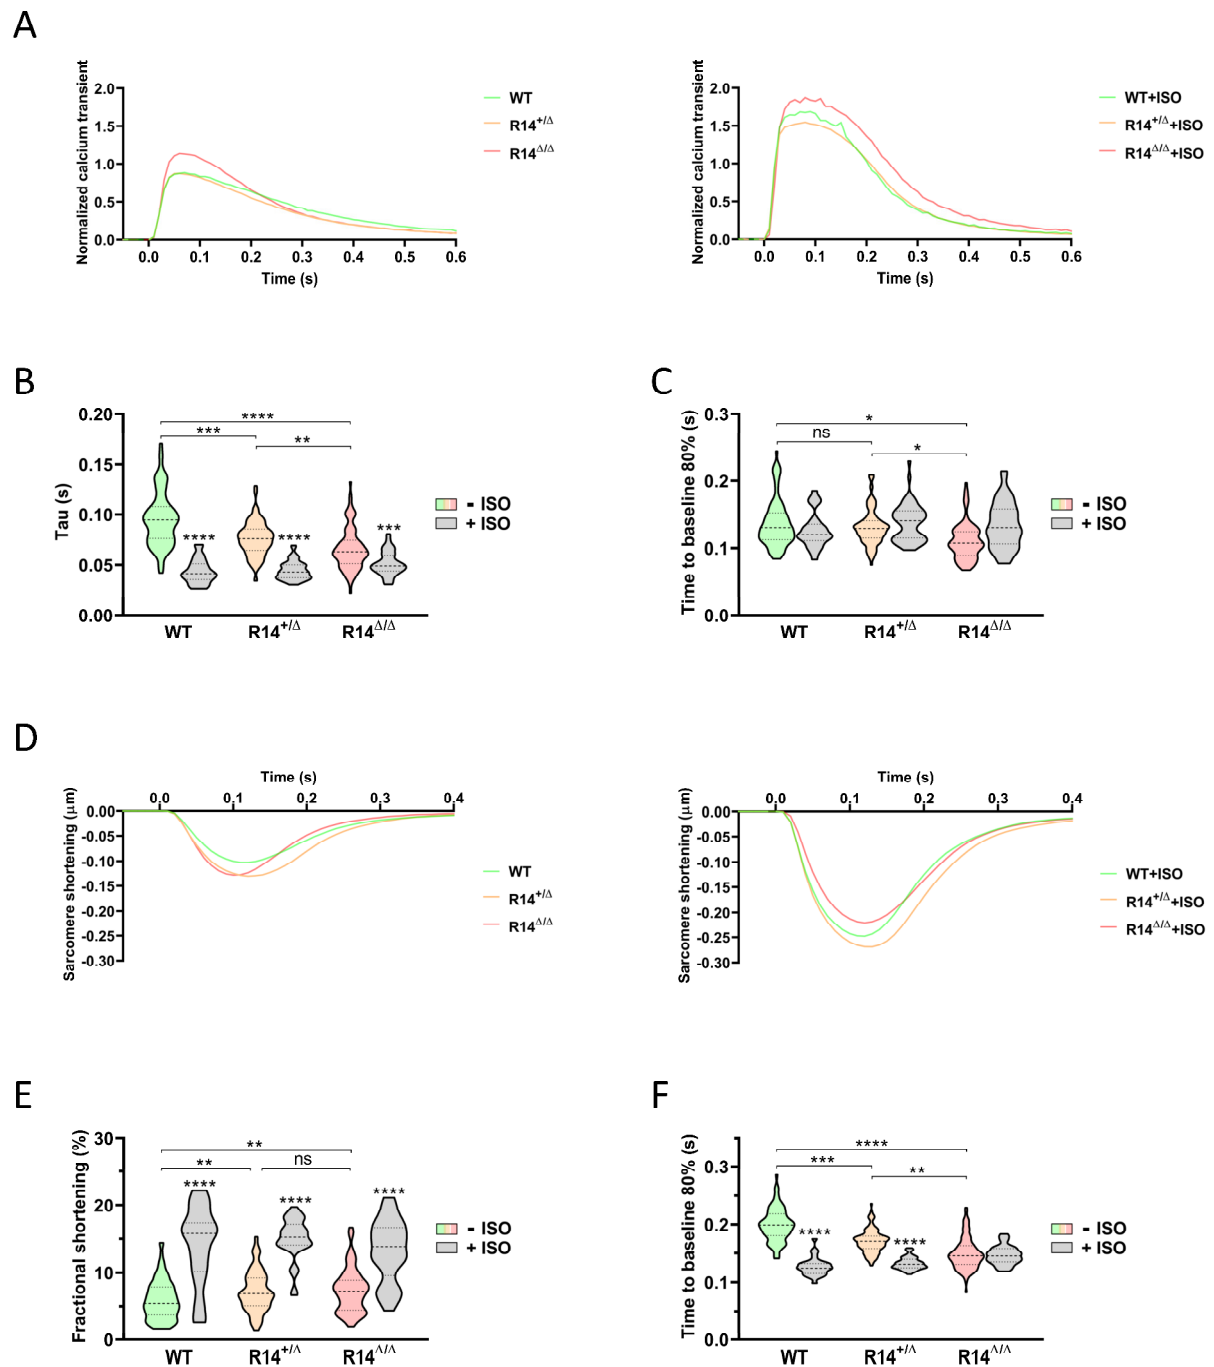

120  
121  
122  
123  
124  
125  
126  
127  
128  
129  
130

**Figure S15 Calcium handling and sarcomere function parameters in WT, R14<sup>+/-</sup> and R14<sup>-/-</sup> cardiomyocytes.** **A**, Normalized calcium transients under pacing-conditions with and without ISO stimulation, with quantification of **(B)** decay time constant (Tau) and **(C)** time to reduce systolic calcium level by 80%. **D**, Normalized pacing-induced sarcomere contraction-relaxation curves with and without ISO stimulation, with quantification of **(E)** fractional shortening and **(F)** time to reach 80% of the diastolic sarcomere length after systole. All experiments were performed in isolated adult mouse cardiomyocytes from 3-week-old WT, R14<sup>+/-</sup> and R14<sup>-/-</sup> mice (-ISO: n = 80–100 cells from 4 mice per group, +ISO: n = 30–40 cells from 4 mice per group). ISO= isoproterenol, ISO condition was compared with the untreated matched genotype. \* P<0.05, \*\* P<0.01, \*\*\* P<0.001, \*\*\*\* P<0.0001. Significance was examined by Hierarchical cluster analysis using ANOVA with Bonferroni correction.

131 **Supplementary tables**

132

133 **Table S1.** Antibodies that were used for IF-staining

| <b>Antibody</b>         | <b>Catalogue number</b>  | <b>Host</b> | <b>Type</b> |
|-------------------------|--------------------------|-------------|-------------|
| Anti-PLN                | MA3-922 ThermoFisher     | Mouse       | Primary     |
| Anti-SERCA2             | MA3-919 ThermoFisher     | Mouse       | Primary     |
| Anti-calnexin           | Ab 22595 Abcam           | Rabbit      | Primary     |
| Anti-HRC                | HPA004833 Merck          | Rabbit      | Primary     |
| Anti-ATL3               | 16921-1-AP-s Proteintech | Rabbit      | Primary     |
| Anti-cardiac troponin I | ab47003                  | Rabbit      | Primary     |
| Anti-Tom20              | sc-11415 Santa Cruz      | Rabbit      | Primary     |
| Anti-p62                | ab56416, Abcam           | Mouse       | Primary     |
| Donkey anti mouse       | A21202 Invitrogen        | Donkey      | Secondary   |
| Donkey anti rabbit      | A31572 Invitrogen        | Donkey      | Secondary   |
| Alexa 555 streptavidin  | S32355 Invitrogen        | -           | Secondary   |

134

135 **Table S2.** Primer sequences used for qPCR

| <b>Gene</b>         | <b>Forward primer (5'-3')</b> | <b>Reverse primer (5'-3')</b> |
|---------------------|-------------------------------|-------------------------------|
| <i>Rplp0</i> (36B4) | AAGCGCGTCCTGGCATTGTC          | GCAGCCGCAAATGCAGATGG          |
| <i>Col1a1</i>       | AGAGCATGACCGATGGATTC          | CGCTGTTCTTGCAGTGATAG          |
| <i>Lgals3</i>       | CAGTGAAACCCAACGCAAAC          | AGGCAACATCATTCCCTCTC          |
| <i>Nppa</i>         | GCTTCCAGGCCATATTGGAG          | GGTGGTCTAGCAGGTTCTTG          |
| <i>Myh6</i>         | AGCTCATGGCTACACTCTTC          | GTGGGTGGTCTTCAGGTTTG          |
| <i>Myh7</i>         | GAGCATTCTCCTGCTGTTTC          | GAGCCTTGGATTCTCAAACG          |
| <i>Dwarf</i>        | TTCTTCTCCTGGTTGGATGG          | TCTTCTAAATGGTGTGAGATTGAAGT    |

136

137 **Table S3.** Antibodies that were used for Western blot

| <b>Antibody</b>   | <b>Catalogue number</b> | <b>Host</b> | <b>Type</b> | <b>Note</b>          |
|-------------------|-------------------------|-------------|-------------|----------------------|
| Anti-DWORF        | Custom made             | Rabbit      | Primary     | Nelson, Science 2016 |
| Anti-PLN          | 14562 Cell Signaling    | Rabbit      | Primary     |                      |
| Goat anti rabbit  | P044801 Dako            | Goat        | Secondary   |                      |
| Rabbit anti mouse | P0260 Dako              | Rabbit      | Secondary   |                      |

138

139 **Table S4.** Isolated cardiomyocyte calcium transient amplitudes at 3 weeks of age

| <b>Genotype</b>                        | <b>Ca<sup>2+</sup> amplitude -ISO</b> | <b>Ca<sup>2+</sup> amplitude +ISO</b> |
|----------------------------------------|---------------------------------------|---------------------------------------|
| WT                                     | 0.95 ± 0.04                           | 1.87 ± 0.20 **                        |
| R14 <sup>Δ/Δ</sup>                     | 1.15 ± 0.04                           | 1.87 ± 0.10 *                         |
| R14 <sup>Δ/Δ</sup> DWORF <sup>Tg</sup> | 1.27 ± 0.04                           | 1.81 ± 0.13                           |

140 Data are represented as means ± SEM. ISO= isoproterenol. -ISO: n = 80–100 cells from 4  
 141 mice per group, +ISO: n = 30–40 cells from 4 mice per group. -ISO conditions were  
 142 compared to WT control and +ISO conditions were compared to the corresponding -ISO  
 143 genotype-matching control. \* P<0.05, \*\* P<0.01. Significance was examined by Hierarchical  
 144 cluster analysis using ANOVA with Bonferroni correction.
