# Supplementary material for: DWORF Extends Life Span in a PLN-R14del Cardiomyopathy Mouse Model by Reducing Abnormal Sarcoplasmic Reticulum Clusters
Source: PubMed Central journal article supplement — Circ Res. 2023 Nov 13;133(12):1006–21. doi: 10.1161/CIRCRESAHA.123.323304 (PMC10699510; doi:10.1161/circresaha.123.323304), 2023-11-13
Supplement: res-133-1006-s003.pdf [file res-133-1006-s003.pdf]

## Major Resources Table

In order to allow validation and replication of experiments, all essential research materials listed in the Methods should be included in the Major Resources Table below. Authors are encouraged to use public repositories for protocols, data, code, and other materials and provide persistent identifiers and/or links to repositories when available. Authors may add or delete rows as needed.

### Animals (*in vivo* studies)

| Species                       | Vendor or Source | Background Strain | Sex | Persistent ID / URL |
|-------------------------------|------------------|-------------------|-----|---------------------|
| Mouse ( <i>Mus musculus</i> ) | UMC Groningen    | C57BL6/J          | M/F |                     |

### Genetically Modified Animals

| Description                       | Species                       | Vendor or Source               | Background Strain | Other Information      | Persistent ID / URL                                                                               |
|-----------------------------------|-------------------------------|--------------------------------|-------------------|------------------------|---------------------------------------------------------------------------------------------------|
| PlnR14del-KI; Hprt <sup>Cre</sup> | Mouse ( <i>Mus musculus</i> ) | UMC Groningen                  | C57BL6/J          | PLN-R14 <sup>Δ/Δ</sup> | <a href="https://pubmed.ncbi.nlm.nih.gov/32555305/">https://pubmed.ncbi.nlm.nih.gov/32555305/</a> |
| Tg(aMHC-Dwarf)                    | Mouse ( <i>Mus musculus</i> ) | UT Southwestern Medical Center | C57BL6/J          | DWORF <sup>Tg</sup>    | <a href="https://pubmed.ncbi.nlm.nih.gov/26816378/">https://pubmed.ncbi.nlm.nih.gov/26816378/</a> |

### Antibodies

| Target antigen | Vendor or Source         | Catalog #  | Working concentration                | Persistent ID / URL                                                                                                                                                                                                                    |
|----------------|--------------------------|------------|--------------------------------------|----------------------------------------------------------------------------------------------------------------------------------------------------------------------------------------------------------------------------------------|
| ATL3           | Proteintech              | 16921-1-AP | 1:100 for IF                         | <a href="http://www.ptglab.com/products/ATL3-Antibody-16921-1-AP.htm">www.ptglab.com/products/ATL3-Antibody-16921-1-AP.htm</a>                                                                                                         |
| CNX            | Abcam                    | Ab22595    | 1:100 for IF                         | <a href="http://www.abcam.com/en-us/products/primary-antibodies/anti-calnexin-antibody-er-marker-ab22595">www.abcam.com/en-us/products/primary-antibodies/anti-calnexin-antibody-er-marker-ab22595</a>                                 |
| cTnl           | Abcam                    | ab47003    | 1:100 for IF                         | <a href="http://www.abcam.com/en-us/products/primary-antibodies/anti-cardiac-troponin-i-antibody-ab47003">www.abcam.com/en-us/products/primary-antibodies/anti-cardiac-troponin-i-antibody-ab47003</a>                                 |
| DWORF          | Custom                   | N/A        | 1:1000 for WB                        | <a href="https://doi.org/10.1126/science.aad4076">doi.org/10.1126/science.aad4076</a>                                                                                                                                                  |
| HRC            | Sigma-Aldrich            | HPA004833  | 1:100 for IF                         | <a href="http://www.sigmaaldrich.com/US/en/product/sigma/hpa004833">www.sigmaaldrich.com/US/en/product/sigma/hpa004833</a>                                                                                                             |
| p62            | Abcam                    | ab56416    | Labeled 1:20 for IF<br>1:1000 for WB | <a href="http://www.abcam.com/en-us/products/primary-antibodies/anti-sqstm1-p62-antibody-2c11-bsa-and-azide-free-ab56416">www.abcam.com/en-us/products/primary-antibodies/anti-sqstm1-p62-antibody-2c11-bsa-and-azide-free-ab56416</a> |
| PLN            | Cell Signaling           | 14562      | 1:1000 for WB                        | <a href="http://www.cellsignal.com/products/primary-antibodies/phospholamban-d9w8m-rabbit-mab/14562">www.cellsignal.com/products/primary-antibodies/phospholamban-d9w8m-rabbit-mab/14562</a>                                           |
| PLN            | Thermo Fisher Scientific | MA3-922    | 1:200 for EM and IF                  | <a href="http://www.thermofisher.com/antibody/product/Phospholamban-Antibody-clone-2D12-Monoclonal/MA3-922">www.thermofisher.com/antibody/product/Phospholamban-Antibody-clone-2D12-Monoclonal/MA3-922</a>                             |
| SERCA          | Thermo Fisher Scientific | MA3-919    | 1:100 for IF                         | <a href="https://www.thermofisher.com/antibody/product/SERCA2-ATPase-Antibody-clone-2A7-A1-Monoclonal/MA3-919">https://www.thermofisher.com/antibody/product/SERCA2-ATPase-Antibody-clone-2A7-A1-Monoclonal/MA3-919</a>                |
| Tom20          | Santa Cruz               | sc-11415   | 1:400 for IF                         | <a href="http://www.scbt.com/p/tom20-antibody-fl-145">www.scbt.com/p/tom20-antibody-fl-145</a>                                                                                                                                         |

### Primers for mRNA analysis

| Species      | Gene         | Chemistry  | Sequence                      |
|--------------|--------------|------------|-------------------------------|
| Mus Musculus | Rplp0 (36B4) | Sybr Green | 5'- AAGCGCGTCTGGCATTGTC – 3'  |
|              |              |            | 5'- GCAGCCGAAATGCAGATGG – 3'  |
| Mus Musculus | Col1a1       | Sybr Green | 5'- AGAGCATGACCGATGGATTC – 3' |
|              |              |            | 5'- CGCTGTTCTTGCAGTGATAG – 3' |
| Mus Musculus | Lgals3       | Sybr Green | 5'-CAGTGAAACCCAACGCAAAC – 3'  |
|              |              |            | 5'-AGGCAACATCATTCCTCTC – 3'   |
| Mus Musculus | Nppa         | Sybr Green | 5'-GCTCCAGGCCATATTGGAG – 3'   |
|              |              |            | 5'-GGTGGTCTAGCAGGTTCTTG – 3'  |

DOI [to be added]

|                 |       |            |                                 |
|-----------------|-------|------------|---------------------------------|
| Mus<br>Musculus | Myh6  | Sybr Green | 5'-AGCTCATGGCTACACTCTTC – 3'    |
|                 |       |            | 5'-GTGGGTGGTCTTCAGGTTTG – 3'    |
| Mus<br>Musculus | Myh7  | Sybr Green | 5'-GAGCATTCTCTGCTGTTTC – 3'     |
|                 |       |            | 5'-GAGCCTGGATTCTCAAACG – 3'     |
| Mus<br>Musculus | Dworf | Sybr Green | 5'-TTCTTCTCCTGGTTGGATGG – 3'    |
|                 |       |            | 5'-TCTTCTAAATGGTGTGATGAAGT – 3' |

## Other

| Description                                             | Source /<br>Repository              | Persistent ID / URL                                                                                                                                                                                                                                                                        |
|---------------------------------------------------------|-------------------------------------|--------------------------------------------------------------------------------------------------------------------------------------------------------------------------------------------------------------------------------------------------------------------------------------------|
| TRI Reagent                                             | Sigma-Aldrich<br>T9424              | <a href="http://www.sigmaaldrich.com/US/en/product/sigma/t9424">www.sigmaaldrich.com/US/en/product/sigma/t9424</a>                                                                                                                                                                         |
| QuantiTect Reverse<br>Transcription Kit                 | Qiagen<br>205311                    | <a href="http://www.qiagen.com/us/products/informatics-and-data/quantitect-reverse-transcription-kit">www.qiagen.com/us/products/informatics-and-data/quantitect-reverse-transcription-kit</a>                                                                                             |
| iQ SYBR Green<br>Supermix                               | Bio-Rad<br>1708880                  | <a href="http://www.bio-rad.com/en-us/sku/1708880-iq-sybr-green-supermix-100-x-50-ul-rxns-2-5-ml-2-x-1-25-ml">www.bio-rad.com/en-us/sku/1708880-iq-sybr-green-supermix-100-x-50-ul-rxns-2-5-ml-2-x-1-25-ml</a>                                                                             |
| Pierce BCA Protein<br>Assay Kit                         | Thermo Fisher<br>Scientific 23225   | <a href="http://www.thermofisher.com/order/catalog/product/23225">www.thermofisher.com/order/catalog/product/23225</a>                                                                                                                                                                     |
| Immun-Blot PVDF<br>Membrane                             | Bio-Rad<br>1620177                  | <a href="http://www.bio-rad.com/en-us/product/immun-blot-pvdf-membrane">www.bio-rad.com/en-us/product/immun-blot-pvdf-membrane</a>                                                                                                                                                         |
| Revert 700 Total<br>Protein Stain                       | LI-COR<br>Biosciences<br>926-11011  | <a href="http://www.licor.com/bio/reagents/revert-700-total-protein-stain">www.licor.com/bio/reagents/revert-700-total-protein-stain</a>                                                                                                                                                   |
| HRP-conjugated goat<br>anti-rabbit Ab                   | Dako<br>P0448                       | <a href="http://www.agilent.com/en/product/specific-proteins/elisa-kits-accessories/goat-anti-rabbit-immunoglobulins-hrp-affinity-isolated-2717113">www.agilent.com/en/product/specific-proteins/elisa-kits-accessories/goat-anti-rabbit-immunoglobulins-hrp-affinity-isolated-2717113</a> |
| Immobilon Classico<br>Western HRP<br>substrate          | Merck Millipore<br>WBLUC0500        | <a href="http://www.emdmillipore.com/US/en/product/Immobilon-Classico-Western-HRP-substrate-500-mL,MM_NF-WBLUC0500">www.emdmillipore.com/US/en/product/Immobilon-Classico-Western-HRP-substrate-500-mL,MM_NF-WBLUC0500</a>                                                                 |
| Alexa Fluor 555<br>Antibody Labeling Kit                | Invitrogen<br>A20187                | <a href="http://www.thermofisher.com/order/catalog/product/A20187">www.thermofisher.com/order/catalog/product/A20187</a>                                                                                                                                                                   |
| FITC-conjugated<br>WGA                                  | Sigma-Aldrich<br>L4895              | <a href="http://www.sigmaaldrich.com/US/en/product/sigma/l4895">www.sigmaaldrich.com/US/en/product/sigma/l4895</a>                                                                                                                                                                         |
| VECTASHIELD<br>Antifade Mounting<br>Medium with DAPI    | Vector<br>Laboratories<br>H-1200-10 | <a href="http://www.vectorlabs.com/products/mounting/vectashield-mounting-medium-with-dapi">www.vectorlabs.com/products/mounting/vectashield-mounting-medium-with-dapi</a>                                                                                                                 |
| APEX Alexa Fluor™<br>488 Antibody<br>Labeling Kit       | Invitrogen<br>A10468                | <a href="http://www.thermofisher.com/order/catalog/product/A10468">www.thermofisher.com/order/catalog/product/A10468</a>                                                                                                                                                                   |
| Alexa Fluor 555-<br>conjugated donkey<br>anti-rabbit Ab | Invitrogen<br>A31572                | <a href="http://www.thermofisher.com/antibody/product/Donkey-anti-Rabbit-IgG-H-L-Highly-Cross-Adsorbed-Secondary-Antibody-Polyclonal/A-31572">www.thermofisher.com/antibody/product/Donkey-anti-Rabbit-IgG-H-L-Highly-Cross-Adsorbed-Secondary-Antibody-Polyclonal/A-31572</a>             |
| APEX Biotin-XX<br>Antibody Labeling Kit                 | Invitrogen<br>A10495                | <a href="http://www.thermofisher.com/order/catalog/product/A10495">www.thermofisher.com/order/catalog/product/A10495</a>                                                                                                                                                                   |
| Streptavidin, Alexa<br>Fluor 555 conjugate              | Invitrogen<br>S21381                | <a href="http://www.thermofisher.com/order/catalog/product/S21381">www.thermofisher.com/order/catalog/product/S21381</a>                                                                                                                                                                   |
| Endogenous Biotin-<br>Blocking Kit                      | Invitrogen<br>E21390                | <a href="http://www.thermofisher.com/order/catalog/product/E21390">www.thermofisher.com/order/catalog/product/E21390</a>                                                                                                                                                                   |
| Mounting Medium<br>with DAPI                            | Abcam<br>ab104139                   | <a href="http://www.abcam.com/en-us/products/media/mounting-medium-with-dapi-aqueous-fluoroshield-ab104139">www.abcam.com/en-us/products/media/mounting-medium-with-dapi-aqueous-fluoroshield-ab104139</a>                                                                                 |

|                                                 |                                |                                                                                                                                                                                                                                                                              |
|-------------------------------------------------|--------------------------------|------------------------------------------------------------------------------------------------------------------------------------------------------------------------------------------------------------------------------------------------------------------------------|
| Alexa Fluor 488-conjugated donkey anti-mouse Ab | Invitrogen A21202              | <a href="http://www.thermofisher.com/antibody/product/Donkey-anti-Mouse-IgG-H-L-Highly-Cross-Adsorbed-Secondary-Antibody-Polyclonal/A-21202">www.thermofisher.com/antibody/product/Donkey-anti-Mouse-IgG-H-L-Highly-Cross-Adsorbed-Secondary-Antibody-Polyclonal/A-21202</a> |
| Biotinylated horse anti-mouse Ab                | Vector Laboratories BA-2001    | <a href="http://www.vectorlabs.com/products/antibodies/biotinylated-horse-anti-mouse-igg-rat-adsorbed">www.vectorlabs.com/products/antibodies/biotinylated-horse-anti-mouse-igg-rat-adsorbed</a>                                                                             |
| Streptavidin-conjugated Qdot 655                | Invitrogen Q10123MP            | <a href="http://www.thermofisher.com/order/catalog/product/Q10123MP">www.thermofisher.com/order/catalog/product/Q10123MP</a>                                                                                                                                                 |
| Fura-2, AM                                      | Invitrogen F1221               | <a href="http://www.thermofisher.com/order/catalog/product/F1221">www.thermofisher.com/order/catalog/product/F1221</a>                                                                                                                                                       |
| PowerLoad Concentrate                           | Invitrogen P10020              | <a href="http://www.thermofisher.com/order/catalog/product/P10020">www.thermofisher.com/order/catalog/product/P10020</a>                                                                                                                                                     |
| Isoproterenol hydrochloride                     | Sigma-Aldrich I6504            | <a href="http://www.sigmaaldrich.com/US/en/product/sigma/i6504">www.sigmaaldrich.com/US/en/product/sigma/i6504</a>                                                                                                                                                           |
| Muscle Injury Panel 3 Mouse Kit                 | Meso Scale Diagnostics K15186C | <a href="http://www.mesoscale.com/en/products/muscle-injury-panel-3-mouse-kit-k15186c/">www.mesoscale.com/en/products/muscle-injury-panel-3-mouse-kit-k15186c/</a>                                                                                                           |
| Evans Blue                                      | Sigma-Aldrich E2129            | <a href="https://www.sigmaaldrich.com/NL/en/product/sigma/e2129">https://www.sigmaaldrich.com/NL/en/product/sigma/e2129</a>                                                                                                                                                  |
