# Supplementary material for: DWORF Extends Life Span in a PLN-R14del Cardiomyopathy Mouse Model by Reducing Abnormal Sarcoplasmic Reticulum Clusters
Source: PubMed Central journal article supplement — Circ Res. 2023 Nov 13;133(12):1006–21. doi: 10.1161/CIRCRESAHA.123.323304 (PMC10699510; doi:10.1161/circresaha.123.323304), 2023-11-13
Supplement: res-133-1006-s004.pdf [file res-133-1006-s004.pdf]

**Details on statistical tests:**

| <b>Figure</b> | <b>Program used</b>  | <b>Normal Distribution</b>           | <b>Subgroups</b> | <b>Statistical Test</b>                      | <b>Post Hoc Correction</b>       |
|---------------|----------------------|--------------------------------------|------------------|----------------------------------------------|----------------------------------|
| <b>1B</b>     | GraphPad Prism 8.4.2 | No, N too small                      | Not applicable   | Log-rank (Mantel-Cox) test                   | Not applicable                   |
| <b>1D</b>     | GraphPad Prism 8.4.2 | No, N too small                      | 6,4 wks:         | Kruskal-Wallis                               | Dunn's multiple comparisons test |
|               |                      |                                      | 10,14,18 wks:    | Mann-Whitney U                               | Not applicable                   |
| <b>1E</b>     | GraphPad Prism 8.4.2 | No, N too small                      | 6,4 wks:         | Kruskal-Wallis                               | Dunn's multiple comparisons test |
|               |                      |                                      | 10,14,18 wks:    | Mann-Whitney U                               | Not applicable                   |
| <b>1F</b>     | GraphPad Prism 8.4.2 | No, N too small                      | 6,4 wks:         | Kruskal-Wallis                               | Dunn's multiple comparisons test |
|               |                      |                                      | 10,14,18 wks:    | Mann-Whitney U                               | Not applicable                   |
| <b>1H</b>     | GraphPad Prism 8.4.2 | No, N too small                      | 6,4 wks:         | Kruskal-Wallis                               | Dunn's multiple comparisons test |
|               |                      |                                      | 10,14,18 wks:    | Mann-Whitney U                               | Not applicable                   |
| <b>2A</b>     | GraphPad Prism 8.4.2 | No, N too small                      | 3,5,7 wks:       | Kruskal-Wallis                               | Dunn's multiple comparisons test |
|               |                      |                                      | 18 wks:          | Mann-Whitney U                               | Not applicable                   |
| <b>2B</b>     | GraphPad Prism 8.4.2 | No, N too small                      | 3,5,7 wks:       | Kruskal-Wallis                               | Dunn's multiple comparisons test |
|               |                      |                                      | 18 wks:          | Mann-Whitney U                               | Not applicable                   |
| <b>2C</b>     | GraphPad Prism 8.4.2 | No, N too small                      | 3,5,7 wks:       | Kruskal-Wallis                               | Dunn's multiple comparisons test |
|               |                      |                                      | 18 wks:          | Mann-Whitney U                               | Not applicable                   |
| <b>2D</b>     | GraphPad Prism 8.4.2 | No, N too small                      | 3,5,7 wks:       | Kruskal-Wallis                               | Dunn's multiple comparisons test |
|               |                      |                                      | 18 wks:          | Mann-Whitney U                               | Not applicable                   |
| <b>2F</b>     | GraphPad Prism 8.4.2 | No, N too small                      | 3,5,7 wks:       | Kruskal-Wallis                               | Dunn's multiple comparisons test |
|               |                      |                                      | 18 wks:          | Mann-Whitney U                               | Not applicable                   |
| <b>3B</b>     | R 4.3.1              | No, hence log-transformation of data | Not applicable   | Hierarchical cluster analysis, two-way ANOVA | Bonferroni                       |
| <b>3D</b>     | R 4.3.1              | No, hence log-transformation of data | Not applicable   | Hierarchical cluster analysis, two-way ANOVA | Bonferroni                       |
| <b>4B</b>     | GraphPad Prism 8.4.2 | No, N too small                      | 7 wks:           | Kruskal-Wallis                               | Dunn's multiple comparisons test |
|               |                      |                                      | 18 wks:          | Mann-Whitney U                               | Not applicable                   |
| <b>4D</b>     | GraphPad Prism 8.4.2 | No, N too small                      | 7 wks:           | Kruskal-Wallis                               | Dunn's multiple comparisons test |
|               |                      |                                      | 18 wks:          | Mann-Whitney U                               | Not applicable                   |
| <b>7D</b>     | GraphPad Prism 8.4.2 | No, N too small                      | Not applicable   | Kruskal-Wallis                               | Dunn's multiple comparisons test |
| <b>7E</b>     | GraphPad Prism 8.4.2 | No, N too small                      | Not applicable   | Kruskal-Wallis                               | Dunn's multiple comparisons test |

|                 |                      |                                      |                |                                              |                                  |
|-----------------|----------------------|--------------------------------------|----------------|----------------------------------------------|----------------------------------|
| <b>7F</b>       | GraphPad Prism 8.4.2 | No, N too small                      | Not applicable | Kruskal-Wallis                               | Dunn's multiple comparisons test |
| <b>S1A</b>      | GraphPad Prism 8.4.2 | No, N too small                      | Not applicable | Mann-Whitney U                               | Not applicable                   |
| <b>S1B</b>      | GraphPad Prism 8.4.2 | No, N too small                      | Not applicable | Kruskal-Wallis                               | Dunn's multiple comparisons test |
| <b>S1D</b>      | GraphPad Prism 8.4.2 | No, N too small                      | Not applicable | Kruskal-Wallis                               | Dunn's multiple comparisons test |
| <b>S2A</b>      | GraphPad Prism 8.4.2 | No, N too small                      | 3,5,7 wks:     | Kruskal-Wallis                               | Dunn's multiple comparisons test |
|                 |                      |                                      | 18 wks:        | Mann-Whitney U                               | Not applicable                   |
| <b>S2B</b>      | GraphPad Prism 8.4.2 | No, N too small                      | 3,5,7 wks:     | Kruskal-Wallis                               | Dunn's multiple comparisons test |
|                 |                      |                                      | 18 wks:        | Mann-Whitney U                               | Not applicable                   |
| <b>S2C</b>      | GraphPad Prism 8.4.2 | No, N too small                      | 3,5,7 wks:     | Kruskal-Wallis                               | Dunn's multiple comparisons test |
|                 |                      |                                      | 18 wks:        | Mann-Whitney U                               | Not applicable                   |
| <b>S3B</b>      | R 4.3.1              | No, hence log-transformation of data | Not applicable | Hierarchical cluster analysis, two-way ANOVA | Bonferroni                       |
| <b>S3D</b>      | R 4.3.1              | No, hence log-transformation of data | Not applicable | Hierarchical cluster analysis, two-way ANOVA | Bonferroni                       |
| <b>S4A</b>      | GraphPad Prism 8.4.2 | No, N too small                      | Not applicable | Kruskal-Wallis                               | Dunn's multiple comparisons test |
| <b>S4C</b>      | R 4.3.1              | No, hence log-transformation of data | Not applicable | Hierarchical cluster analysis, two-way ANOVA | Bonferroni                       |
| <b>S4E</b>      | R 4.3.1              | No, hence log-transformation of data | Not applicable | Hierarchical cluster analysis, two-way ANOVA | Bonferroni                       |
| <b>S13A</b>     | GraphPad Prism 8.4.2 | No, N too small                      | Not applicable | Kruskal-Wallis                               | Dunn's multiple comparisons test |
| <b>S13B</b>     | GraphPad Prism 8.4.2 | No, N too small                      | Not applicable | Kruskal-Wallis                               | Dunn's multiple comparisons test |
| <b>S13D</b>     | GraphPad Prism 8.4.2 | No, N too small                      | Not applicable | Kruskal-Wallis                               | Dunn's multiple comparisons test |
| <b>S15B</b>     | R 4.3.1              | No, hence log-transformation of data | Not applicable | Hierarchical cluster analysis, two-way ANOVA | Bonferroni                       |
| <b>S15C</b>     | R 4.3.1              | No, hence log-transformation of data | Not applicable | Hierarchical cluster analysis, two-way ANOVA | Bonferroni                       |
| <b>S15E</b>     | R 4.3.1              | No, hence log-transformation of data | Not applicable | Hierarchical cluster analysis, two-way ANOVA | Bonferroni                       |
| <b>S15F</b>     | R 4.3.1              | No, hence log-transformation of data | Not applicable | Hierarchical cluster analysis, two-way ANOVA | Bonferroni                       |
| <b>Table S4</b> | R 4.3.1              | No, hence log-transformation of data | Not applicable | Hierarchical cluster analysis, two-way ANOVA | Bonferroni                       |

**Comparisons Figure 1B:**

Sample size: WT n=8, R14<sup>Δ/Δ</sup> n=6, R14<sup>Δ/Δ</sup>DWORF<sup>Tg</sup> n=9.

Testing statistical differences for whole data set: P = 7.02e-008.

R14<sup>Δ/Δ</sup> versus R14<sup>Δ/Δ</sup>DWORF<sup>Tg</sup>: P = 2.71e-005.

**Comparisons Figure 1D:**

| Comparison                                                              | Sample size                                                         | P-value   | Significant |
|-------------------------------------------------------------------------|---------------------------------------------------------------------|-----------|-------------|
| 4 wks: WT versus R14 <sup>Δ/Δ</sup>                                     | WT n=10, R14 <sup>Δ/Δ</sup> n=8                                     | 5.34e-001 | No          |
| 4 wks: WT versus R14 <sup>Δ/Δ</sup> DWORF <sup>Tg</sup>                 | WT n=10, R14 <sup>Δ/Δ</sup> DWORF <sup>Tg</sup> n=10                | 4.80e-001 | No          |
| 4 wks: R14 <sup>Δ/Δ</sup> versus R14 <sup>Δ/Δ</sup> DWORF <sup>Tg</sup> | R14 <sup>Δ/Δ</sup> n=8, R14 <sup>Δ/Δ</sup> DWORF <sup>Tg</sup> n=10 | 2.27e-002 | Yes         |
|                                                                         |                                                                     |           |             |
| 6 wks: WT versus R14 <sup>Δ/Δ</sup>                                     | WT n=9, R14 <sup>Δ/Δ</sup> n=9                                      | 3.99e-005 | Yes         |
| 6 wks: WT versus R14 <sup>Δ/Δ</sup> DWORF <sup>Tg</sup>                 | WT n=9, R14 <sup>Δ/Δ</sup> DWORF <sup>Tg</sup> n=10                 | 4.39e-001 | No          |
| 6 wks: R14 <sup>Δ/Δ</sup> versus R14 <sup>Δ/Δ</sup> DWORF <sup>Tg</sup> | R14 <sup>Δ/Δ</sup> n=9, R14 <sup>Δ/Δ</sup> DWORF <sup>Tg</sup> n=10 | 7.68e-003 | Yes         |
|                                                                         |                                                                     |           |             |
| 10 wks: WT versus R14 <sup>Δ/Δ</sup> DWORF <sup>Tg</sup>                | WT n=8, R14 <sup>Δ/Δ</sup> DWORF <sup>Tg</sup> n=9                  | 8.23e-005 | Yes         |
|                                                                         |                                                                     |           |             |
| 14 wks: WT versus R14 <sup>Δ/Δ</sup> DWORF <sup>Tg</sup>                | WT n=7, R14 <sup>Δ/Δ</sup> DWORF <sup>Tg</sup> n=9                  | 1.75e-004 | Yes         |
|                                                                         |                                                                     |           |             |
| 18 wks: WT versus R14 <sup>Δ/Δ</sup> DWORF <sup>Tg</sup>                | WT n=6, R14 <sup>Δ/Δ</sup> DWORF <sup>Tg</sup> n=5                  | 4.33e-003 | Yes         |

**Comparisons Figure 1E:**

| Comparison                                                              | Sample size                                                         | P-value   | Significant |
|-------------------------------------------------------------------------|---------------------------------------------------------------------|-----------|-------------|
| 4 wks: WT versus R14 <sup>Δ/Δ</sup>                                     | WT n=10, R14 <sup>Δ/Δ</sup> n=8                                     | 7.31e-001 | No          |
| 4 wks: WT versus R14 <sup>Δ/Δ</sup> DWORF <sup>Tg</sup>                 | WT n=10, R14 <sup>Δ/Δ</sup> DWORF <sup>Tg</sup> n=10                | 5.65e-001 | No          |
| 4 wks: R14 <sup>Δ/Δ</sup> versus R14 <sup>Δ/Δ</sup> DWORF <sup>Tg</sup> | R14 <sup>Δ/Δ</sup> n=8, R14 <sup>Δ/Δ</sup> DWORF <sup>Tg</sup> n=10 | 4.08e-002 | Yes         |
|                                                                         |                                                                     |           |             |
| 6 wks: WT versus R14 <sup>Δ/Δ</sup>                                     | WT n=9, R14 <sup>Δ/Δ</sup> n=9                                      | 1.50e-004 | Yes         |
| 6 wks: WT versus R14 <sup>Δ/Δ</sup> DWORF <sup>Tg</sup>                 | WT n=9, R14 <sup>Δ/Δ</sup> DWORF <sup>Tg</sup> n=10                 | 6.49e-001 | No          |
| 6 wks: R14 <sup>Δ/Δ</sup> versus R14 <sup>Δ/Δ</sup> DWORF <sup>Tg</sup> | R14 <sup>Δ/Δ</sup> n=9, R14 <sup>Δ/Δ</sup> DWORF <sup>Tg</sup> n=10 | 1.04e-002 | Yes         |
|                                                                         |                                                                     |           |             |
| 10 wks: WT versus R14 <sup>Δ/Δ</sup> DWORF <sup>Tg</sup>                | WT n=8, R14 <sup>Δ/Δ</sup> DWORF <sup>Tg</sup> n=9                  | 3.29e-004 | Yes         |

|                                                          |                                                    |           |     |
|----------------------------------------------------------|----------------------------------------------------|-----------|-----|
| 14 wks: WT versus R14 <sup>Δ/Δ</sup> DWORF <sup>Tg</sup> | WT n=7, R14 <sup>Δ/Δ</sup> DWORF <sup>Tg</sup> n=9 | 1.75e-004 | Yes |
| 18 wks: WT versus R14 <sup>Δ/Δ</sup> DWORF <sup>Tg</sup> | WT n=6, R14 <sup>Δ/Δ</sup> DWORF <sup>Tg</sup> n=5 | 4.33e-003 | Yes |

**Comparisons Figure 1F:**

| Comparison                                                              | Sample size                                                         | P-value    | Significant |
|-------------------------------------------------------------------------|---------------------------------------------------------------------|------------|-------------|
| 4 wks: WT versus R14 <sup>Δ/Δ</sup>                                     | WT n=10, R14 <sup>Δ/Δ</sup> n=8                                     | >9.99e-001 | No          |
| 4 wks: WT versus R14 <sup>Δ/Δ</sup> DWORF <sup>Tg</sup>                 | WT n=10, R14 <sup>Δ/Δ</sup> DWORF <sup>Tg</sup> n=10                | >9.99e-001 | No          |
| 4 wks: R14 <sup>Δ/Δ</sup> versus R14 <sup>Δ/Δ</sup> DWORF <sup>Tg</sup> | R14 <sup>Δ/Δ</sup> n=8, R14 <sup>Δ/Δ</sup> DWORF <sup>Tg</sup> n=10 | 8.95e-001  | No          |
| 6 wks: WT versus R14 <sup>Δ/Δ</sup>                                     | WT n=9, R14 <sup>Δ/Δ</sup> n=9                                      | 7.10e-002  | No          |
| 6 wks: WT versus R14 <sup>Δ/Δ</sup> DWORF <sup>Tg</sup>                 | WT n=9, R14 <sup>Δ/Δ</sup> DWORF <sup>Tg</sup> n=10                 | >9.99e-001 | No          |
| 6 wks: R14 <sup>Δ/Δ</sup> versus R14 <sup>Δ/Δ</sup> DWORF <sup>Tg</sup> | R14 <sup>Δ/Δ</sup> n=9, R14 <sup>Δ/Δ</sup> DWORF <sup>Tg</sup> n=10 | 1.52e-001  | No          |
| 10 wks: WT versus R14 <sup>Δ/Δ</sup> DWORF <sup>Tg</sup>                | WT n=8, R14 <sup>Δ/Δ</sup> DWORF <sup>Tg</sup> n=9                  | 1.75e-001  | No          |
| 14 wks: WT versus R14 <sup>Δ/Δ</sup> DWORF <sup>Tg</sup>                | WT n=7, R14 <sup>Δ/Δ</sup> DWORF <sup>Tg</sup> n=9                  | 1.75e-004  | Yes         |
| 18 wks: WT versus R14 <sup>Δ/Δ</sup> DWORF <sup>Tg</sup>                | WT n=6, R14 <sup>Δ/Δ</sup> DWORF <sup>Tg</sup> n=5                  | 4.33e-003  | Yes         |

**Comparisons Figure 1H:**

| Comparison                                                              | Sample size                                                         | P-value    | Significant |
|-------------------------------------------------------------------------|---------------------------------------------------------------------|------------|-------------|
| 3 wks: WT versus R14 <sup>Δ/Δ</sup>                                     | WT n=3, R14 <sup>Δ/Δ</sup> n=3                                      | >9.99e-001 | No          |
| 3 wks: WT versus R14 <sup>Δ/Δ</sup> DWORF <sup>Tg</sup>                 | WT n=3, R14 <sup>Δ/Δ</sup> DWORF <sup>Tg</sup> n=4                  | 5.36e-001  | No          |
| 3 wks: R14 <sup>Δ/Δ</sup> versus R14 <sup>Δ/Δ</sup> DWORF <sup>Tg</sup> | R14 <sup>Δ/Δ</sup> n=3, R14 <sup>Δ/Δ</sup> DWORF <sup>Tg</sup> n=4  | >9.99e-001 | No          |
| 5 wks: WT versus R14 <sup>Δ/Δ</sup>                                     | WT n=9, R14 <sup>Δ/Δ</sup> n=9                                      | 3.72e-001  | No          |
| 5 wks: WT versus R14 <sup>Δ/Δ</sup> DWORF <sup>Tg</sup>                 | WT n=9, R14 <sup>Δ/Δ</sup> DWORF <sup>Tg</sup> n=11                 | >9.99e-001 | No          |
| 5 wks: R14 <sup>Δ/Δ</sup> versus R14 <sup>Δ/Δ</sup> DWORF <sup>Tg</sup> | R14 <sup>Δ/Δ</sup> n=9, R14 <sup>Δ/Δ</sup> DWORF <sup>Tg</sup> n=11 | >9.99e-001 | No          |
| 7 wks: WT versus R14 <sup>Δ/Δ</sup>                                     | WT n=10, R14 <sup>Δ/Δ</sup> n=5                                     | 1.57e-004  | Yes         |

|                                                                         |                                                                     |           |     |
|-------------------------------------------------------------------------|---------------------------------------------------------------------|-----------|-----|
| 7 wks: WT versus R14 <sup>Δ/Δ</sup> DWORF <sup>Tg</sup>                 | WT n=10, R14 <sup>Δ/Δ</sup> DWORF <sup>Tg</sup> n=10                | 7.38e-002 | No  |
| 7 wks: R14 <sup>Δ/Δ</sup> versus R14 <sup>Δ/Δ</sup> DWORF <sup>Tg</sup> | R14 <sup>Δ/Δ</sup> n=5, R14 <sup>Δ/Δ</sup> DWORF <sup>Tg</sup> n=10 | 8.14e-002 | No  |
|                                                                         |                                                                     |           |     |
| 18 wks: WT versus R14 <sup>Δ/Δ</sup> DWORF <sup>Tg</sup>                | WT n=4, R14 <sup>Δ/Δ</sup> DWORF <sup>Tg</sup> n=4                  | 2.86e-002 | Yes |

#### **Comparisons Figure 2A:**

| <b>Comparison</b>                                                       | <b>Sample size</b>                                                   | <b>P-value</b> | <b>Significant</b> |
|-------------------------------------------------------------------------|----------------------------------------------------------------------|----------------|--------------------|
| 3 wks: WT versus R14 <sup>Δ/Δ</sup>                                     | WT n=3, R14 <sup>Δ/Δ</sup> n=3                                       | 1.08e-001      | No                 |
| 3 wks: WT versus R14 <sup>Δ/Δ</sup> DWORF <sup>Tg</sup>                 | WT n=3, R14 <sup>Δ/Δ</sup> DWORF <sup>Tg</sup> n=4                   | 1.03e-001      | No                 |
| 3 wks: R14 <sup>Δ/Δ</sup> versus R14 <sup>Δ/Δ</sup> DWORF <sup>Tg</sup> | R14 <sup>Δ/Δ</sup> n=3, R14 <sup>Δ/Δ</sup> DWORF <sup>Tg</sup> n=4   | >9.99e-001     | No                 |
|                                                                         |                                                                      |                |                    |
| 5 wks: WT versus R14 <sup>Δ/Δ</sup>                                     | WT n=9, R14 <sup>Δ/Δ</sup> n=9                                       | 5.31e-006      | Yes                |
| 5 wks: WT versus R14 <sup>Δ/Δ</sup> DWORF <sup>Tg</sup>                 | WT n=9, R14 <sup>Δ/Δ</sup> DWORF <sup>Tg</sup> n=11                  | 4.79e-002      | Yes                |
| 5 wks: R14 <sup>Δ/Δ</sup> versus R14 <sup>Δ/Δ</sup> DWORF <sup>Tg</sup> | R14 <sup>Δ/Δ</sup> n=9, R14 <sup>Δ/Δ</sup> DWORF <sup>Tg</sup> n=11  | 2.79e-002      | Yes                |
|                                                                         |                                                                      |                |                    |
| 7 wks: WT versus R14 <sup>Δ/Δ</sup>                                     | WT n=9, R14 <sup>Δ/Δ</sup> n=10                                      | 2.13e-006      | Yes                |
| 7 wks: WT versus R14 <sup>Δ/Δ</sup> DWORF <sup>Tg</sup>                 | WT n=9, R14 <sup>Δ/Δ</sup> DWORF <sup>Tg</sup> n=10                  | 4.24e-002      | Yes                |
| 7 wks: R14 <sup>Δ/Δ</sup> versus R14 <sup>Δ/Δ</sup> DWORF <sup>Tg</sup> | R14 <sup>Δ/Δ</sup> n=10, R14 <sup>Δ/Δ</sup> DWORF <sup>Tg</sup> n=10 | 3.02e-002      | Yes                |
|                                                                         |                                                                      |                |                    |
| 18 wks: WT versus R14 <sup>Δ/Δ</sup> DWORF <sup>Tg</sup>                | WT n=7, R14 <sup>Δ/Δ</sup> DWORF <sup>Tg</sup> n=9                   | 1.75e-004      | Yes                |

#### **Comparisons Figure 2B:**

| <b>Comparison</b>                                                       | <b>Sample size</b>                                                  | <b>P-value</b> | <b>Significant</b> |
|-------------------------------------------------------------------------|---------------------------------------------------------------------|----------------|--------------------|
| 3 wks: WT versus R14 <sup>Δ/Δ</sup>                                     | WT n=2, R14 <sup>Δ/Δ</sup> n=2                                      | 5.46e-001      | No                 |
| 3 wks: WT versus R14 <sup>Δ/Δ</sup> DWORF <sup>Tg</sup>                 | WT n=2, R14 <sup>Δ/Δ</sup> DWORF <sup>Tg</sup> n=4                  | 1.14e-001      | No                 |
| 3 wks: R14 <sup>Δ/Δ</sup> versus R14 <sup>Δ/Δ</sup> DWORF <sup>Tg</sup> | R14 <sup>Δ/Δ</sup> n=2, R14 <sup>Δ/Δ</sup> DWORF <sup>Tg</sup> n=4  | >9.99e-001     | No                 |
|                                                                         |                                                                     |                |                    |
| 5 wks: WT versus R14 <sup>Δ/Δ</sup>                                     | WT n=8, R14 <sup>Δ/Δ</sup> n=9                                      | 2.47e-005      | Yes                |
| 5 wks: WT versus R14 <sup>Δ/Δ</sup> DWORF <sup>Tg</sup>                 | WT n=8, R14 <sup>Δ/Δ</sup> DWORF <sup>Tg</sup> n=11                 | 1.72e-002      | Yes                |
| 5 wks: R14 <sup>Δ/Δ</sup> versus R14 <sup>Δ/Δ</sup> DWORF <sup>Tg</sup> | R14 <sup>Δ/Δ</sup> n=9, R14 <sup>Δ/Δ</sup> DWORF <sup>Tg</sup> n=11 | 1.48e-001      | No                 |
|                                                                         |                                                                     |                |                    |
| 7 wks: WT versus R14 <sup>Δ/Δ</sup>                                     | WT n=9, R14 <sup>Δ/Δ</sup> n=9                                      | 4.51e-006      | Yes                |

|                                                                         |                                                                    |           |     |
|-------------------------------------------------------------------------|--------------------------------------------------------------------|-----------|-----|
| 7 wks: WT versus R14 <sup>Δ/Δ</sup> DWORF <sup>Tg</sup>                 | WT n=9, R14 <sup>Δ/Δ</sup> DWORF <sup>Tg</sup> n=9                 | 4.85e-002 | Yes |
| 7 wks: R14 <sup>Δ/Δ</sup> versus R14 <sup>Δ/Δ</sup> DWORF <sup>Tg</sup> | R14 <sup>Δ/Δ</sup> n=9, R14 <sup>Δ/Δ</sup> DWORF <sup>Tg</sup> n=9 | 4.85e-002 | Yes |
|                                                                         |                                                                    |           |     |
| 18 wks: WT versus R14 <sup>Δ/Δ</sup> DWORF <sup>Tg</sup>                | WT n=7, R14 <sup>Δ/Δ</sup> DWORF <sup>Tg</sup> n=9                 | 1.75e-004 | Yes |

### Comparisons Figure 2C:

| Comparison                                                              | Sample size                                                          | P-value    | Significant |
|-------------------------------------------------------------------------|----------------------------------------------------------------------|------------|-------------|
| 3 wks: WT versus R14 <sup>Δ/Δ</sup>                                     | WT n=3, R14 <sup>Δ/Δ</sup> n=3                                       | 6.23e-001  | No          |
| 3 wks: WT versus R14 <sup>Δ/Δ</sup> DWORF <sup>Tg</sup>                 | WT n=3, R14 <sup>Δ/Δ</sup> DWORF <sup>Tg</sup> n=4                   | 8.99e-002  | No          |
| 3 wks: R14 <sup>Δ/Δ</sup> versus R14 <sup>Δ/Δ</sup> DWORF <sup>Tg</sup> | R14 <sup>Δ/Δ</sup> n=3, R14 <sup>Δ/Δ</sup> DWORF <sup>Tg</sup> n=4   | >9.99e-001 | No          |
|                                                                         |                                                                      |            |             |
| 5 wks: WT versus R14 <sup>Δ/Δ</sup>                                     | WT n=9, R14 <sup>Δ/Δ</sup> n=9                                       | 8.71e-006  | Yes         |
| 5 wks: WT versus R14 <sup>Δ/Δ</sup> DWORF <sup>Tg</sup>                 | WT n=9, R14 <sup>Δ/Δ</sup> DWORF <sup>Tg</sup> n=11                  | 1.87e-002  | Yes         |
| 5 wks: R14 <sup>Δ/Δ</sup> versus R14 <sup>Δ/Δ</sup> DWORF <sup>Tg</sup> | R14 <sup>Δ/Δ</sup> n=9, R14 <sup>Δ/Δ</sup> DWORF <sup>Tg</sup> n=11  | 1.38e-001  | No          |
|                                                                         |                                                                      |            |             |
| 7 wks: WT versus R14 <sup>Δ/Δ</sup>                                     | WT n=9, R14 <sup>Δ/Δ</sup> n=10                                      | 9.94e-005  | Yes         |
| 7 wks: WT versus R14 <sup>Δ/Δ</sup> DWORF <sup>Tg</sup>                 | WT n=9, R14 <sup>Δ/Δ</sup> DWORF <sup>Tg</sup> n=10                  | 1.77e-001  | No          |
| 7 wks: R14 <sup>Δ/Δ</sup> versus R14 <sup>Δ/Δ</sup> DWORF <sup>Tg</sup> | R14 <sup>Δ/Δ</sup> n=10, R14 <sup>Δ/Δ</sup> DWORF <sup>Tg</sup> n=10 | 4.12e-002  | Yes         |
|                                                                         |                                                                      |            |             |
| 18 wks: WT versus R14 <sup>Δ/Δ</sup> DWORF <sup>Tg</sup>                | WT n=7, R14 <sup>Δ/Δ</sup> DWORF <sup>Tg</sup> n=9                   | 8.74e-005  | Yes         |

### Comparisons Figure 2D:

| Comparison                                                              | Sample size                                                         | P-value    | Significant |
|-------------------------------------------------------------------------|---------------------------------------------------------------------|------------|-------------|
| 3 wks: WT versus R14 <sup>Δ/Δ</sup>                                     | WT n=3, R14 <sup>Δ/Δ</sup> n=3                                      | 6.57e-002  | No          |
| 3 wks: WT versus R14 <sup>Δ/Δ</sup> DWORF <sup>Tg</sup>                 | WT n=3, R14 <sup>Δ/Δ</sup> DWORF <sup>Tg</sup> n=4                  | 1.55e-001  | No          |
| 3 wks: R14 <sup>Δ/Δ</sup> versus R14 <sup>Δ/Δ</sup> DWORF <sup>Tg</sup> | R14 <sup>Δ/Δ</sup> n=3, R14 <sup>Δ/Δ</sup> DWORF <sup>Tg</sup> n=4  | >9.99e-001 | No          |
|                                                                         |                                                                     |            |             |
| 5 wks: WT versus R14 <sup>Δ/Δ</sup>                                     | WT n=9, R14 <sup>Δ/Δ</sup> n=9                                      | 1.86e-006  | Yes         |
| 5 wks: WT versus R14 <sup>Δ/Δ</sup> DWORF <sup>Tg</sup>                 | WT n=9, R14 <sup>Δ/Δ</sup> DWORF <sup>Tg</sup> n=11                 | 2.68e-002  | Yes         |
| 5 wks: R14 <sup>Δ/Δ</sup> versus R14 <sup>Δ/Δ</sup> DWORF <sup>Tg</sup> | R14 <sup>Δ/Δ</sup> n=9, R14 <sup>Δ/Δ</sup> DWORF <sup>Tg</sup> n=11 | 2.68e-002  | Yes         |
|                                                                         |                                                                     |            |             |
| 7 wks: WT versus R14 <sup>Δ/Δ</sup>                                     | WT n=9, R14 <sup>Δ/Δ</sup> n=10                                     | 2.90e-006  | Yes         |

|                                                                         |                                                                      |           |     |
|-------------------------------------------------------------------------|----------------------------------------------------------------------|-----------|-----|
| 7 wks: WT versus R14 <sup>Δ/Δ</sup> DWORF <sup>Tg</sup>                 | WT n=9, R14 <sup>Δ/Δ</sup> DWORF <sup>Tg</sup> n=10                  | 3.52e-002 | Yes |
| 7 wks: R14 <sup>Δ/Δ</sup> versus R14 <sup>Δ/Δ</sup> DWORF <sup>Tg</sup> | R14 <sup>Δ/Δ</sup> n=10, R14 <sup>Δ/Δ</sup> DWORF <sup>Tg</sup> n=10 | 4.36e-002 | Yes |
|                                                                         |                                                                      |           |     |
| 18 wks: WT versus R14 <sup>Δ/Δ</sup> DWORF <sup>Tg</sup>                | WT n=7, R14 <sup>Δ/Δ</sup> DWORF <sup>Tg</sup> n=9                   | 1.75e-004 | Yes |

### Comparisons Figure 2F:

| Comparison                                                              | Sample size                                                          | P-value    | Significant |
|-------------------------------------------------------------------------|----------------------------------------------------------------------|------------|-------------|
| 3 wks: WT versus R14 <sup>Δ/Δ</sup>                                     | WT n=3, R14 <sup>Δ/Δ</sup> n=3                                       | >9.99e-001 | No          |
| 3 wks: WT versus R14 <sup>Δ/Δ</sup> DWORF <sup>Tg</sup>                 | WT n=3, R14 <sup>Δ/Δ</sup> DWORF <sup>Tg</sup> n=4                   | 1.68e-001  | No          |
| 3 wks: R14 <sup>Δ/Δ</sup> versus R14 <sup>Δ/Δ</sup> DWORF <sup>Tg</sup> | R14 <sup>Δ/Δ</sup> n=3, R14 <sup>Δ/Δ</sup> DWORF <sup>Tg</sup> n=4   | 5.47e-001  | No          |
|                                                                         |                                                                      |            |             |
| 5 wks: WT versus R14 <sup>Δ/Δ</sup>                                     | WT n=5, R14 <sup>Δ/Δ</sup> n=5                                       | >9.99e-001 | No          |
| 5 wks: WT versus R14 <sup>Δ/Δ</sup> DWORF <sup>Tg</sup>                 | WT n=5, R14 <sup>Δ/Δ</sup> DWORF <sup>Tg</sup> n=5                   | 3.84e-001  | No          |
| 5 wks: R14 <sup>Δ/Δ</sup> versus R14 <sup>Δ/Δ</sup> DWORF <sup>Tg</sup> | R14 <sup>Δ/Δ</sup> n=5, R14 <sup>Δ/Δ</sup> DWORF <sup>Tg</sup> n=5   | 1.82e-001  | No          |
|                                                                         |                                                                      |            |             |
| 7 wks: WT versus R14 <sup>Δ/Δ</sup>                                     | WT n=7, R14 <sup>Δ/Δ</sup> n=10                                      | 3.16e-005  | Yes         |
| 7 wks: WT versus R14 <sup>Δ/Δ</sup> DWORF <sup>Tg</sup>                 | WT n=7, R14 <sup>Δ/Δ</sup> DWORF <sup>Tg</sup> n=10                  | 7.89e-002  | No          |
| 7 wks: R14 <sup>Δ/Δ</sup> versus R14 <sup>Δ/Δ</sup> DWORF <sup>Tg</sup> | R14 <sup>Δ/Δ</sup> n=10, R14 <sup>Δ/Δ</sup> DWORF <sup>Tg</sup> n=10 | 4.83e-002  | Yes         |
|                                                                         |                                                                      |            |             |
| 18 wks: WT versus R14 <sup>Δ/Δ</sup> DWORF <sup>Tg</sup>                | WT n=7, R14 <sup>Δ/Δ</sup> DWORF <sup>Tg</sup> n=9                   | 1.75e-004  | Yes         |

### Comparisons Figure 3B:

| Comparison                                                       | Sample size                                                                                        | P-value  | Significant |
|------------------------------------------------------------------|----------------------------------------------------------------------------------------------------|----------|-------------|
| <b>TAU</b>                                                       |                                                                                                    |          |             |
| WT versus R14 <sup>Δ/Δ</sup>                                     | WT n=4 mice, 84 cells<br>R14 <sup>Δ/Δ</sup> n=4 mice, 98 cells                                     | 4.03E-06 | Yes         |
| WT versus R14 <sup>Δ/Δ</sup> DWORF <sup>Tg</sup>                 | WT n=4 mice, 84 cells<br>R14 <sup>Δ/Δ</sup> DWORF <sup>Tg</sup> n=4 mice, 85 cells                 | 2.24E-07 | Yes         |
| R14 <sup>Δ/Δ</sup> versus R14 <sup>Δ/Δ</sup> DWORF <sup>Tg</sup> | R14 <sup>Δ/Δ</sup> n=4 mice, 98 cells<br>R14 <sup>Δ/Δ</sup> DWORF <sup>Tg</sup> n=4 mice, 85 cells | 7.58E-01 | No          |
| WT-ISO versus WT+ISO                                             | WT-ISO n=4 mice, 84 cells<br>WT+ISO n=4 mice, 27 cells                                             | 5.74E-15 | Yes         |

|                                                                                            |                                                                                                                                  |          |     |
|--------------------------------------------------------------------------------------------|----------------------------------------------------------------------------------------------------------------------------------|----------|-----|
| R14 <sup>Δ/Δ</sup> -ISO versus R14 <sup>Δ/Δ</sup> +ISO                                     | R14 <sup>Δ/Δ</sup> -ISO n=4 mice, 98 cells<br>R14 <sup>Δ/Δ</sup> +ISO n=4 mice, 42 cells                                         | 1.92E-03 | Yes |
| R14 <sup>Δ/Δ</sup> DWORF <sup>Tg</sup> -ISO vs R14 <sup>Δ/Δ</sup> DWORF <sup>Tg</sup> +ISO | R14 <sup>Δ/Δ</sup> DWORF <sup>Tg</sup> -ISO n=4 mice, 85 cells<br>R14 <sup>Δ/Δ</sup> DWORF <sup>Tg</sup> +ISO n=4 mice, 35 cells | 1.38E-04 | Yes |
| <b>Time to baseline 80%</b>                                                                |                                                                                                                                  |          |     |
| WT versus R14 <sup>Δ/Δ</sup>                                                               | WT n=4 mice, 79 cells<br>R14 <sup>Δ/Δ</sup> n=4 mice, 98 cells                                                                   | 7.79E-07 | Yes |
| WT versus R14 <sup>Δ/Δ</sup> DWORF <sup>Tg</sup>                                           | WT n=4 mice, 79 cells<br>R14 <sup>Δ/Δ</sup> DWORF <sup>Tg</sup> n=4 mice, 83 cells                                               | 1.01E-07 | Yes |
| R14 <sup>Δ/Δ</sup> versus R14 <sup>Δ/Δ</sup> DWORF <sup>Tg</sup>                           | R14 <sup>Δ/Δ</sup> n=4 mice, 98 cells<br>R14 <sup>Δ/Δ</sup> DWORF <sup>Tg</sup> n=4 mice, 85 cells                               | 1.00     | No  |
| WT-ISO versus WT+ISO                                                                       | WT-ISO n=4 mice, 79 cells<br>WT+ISO n=4 mice, 28 cells                                                                           | 2.56E-11 | Yes |
| R14 <sup>Δ/Δ</sup> -ISO versus R14 <sup>Δ/Δ</sup> +ISO                                     | R14 <sup>Δ/Δ</sup> -ISO n=4 mice, 98 cells<br>R14 <sup>Δ/Δ</sup> +ISO n=4 mice, 43 cells                                         | 1.00     | No  |
| R14 <sup>Δ/Δ</sup> DWORF <sup>Tg</sup> -ISO vs R14 <sup>Δ/Δ</sup> DWORF <sup>Tg</sup> +ISO | R14 <sup>Δ/Δ</sup> DWORF <sup>Tg</sup> -ISO n=4 mice, 83 cells<br>R14 <sup>Δ/Δ</sup> DWORF <sup>Tg</sup> +ISO n=4 mice, 34 cells | 1.00     | No  |
| <b>Relaxation velocity</b>                                                                 |                                                                                                                                  |          |     |
| WT versus R14 <sup>Δ/Δ</sup>                                                               | WT n=4 mice, 76 cells<br>R14 <sup>Δ/Δ</sup> n=4 mice, 93 cells                                                                   | 3.49E-03 | Yes |
| WT versus R14 <sup>Δ/Δ</sup> DWORF <sup>Tg</sup>                                           | WT n=4 mice, 76 cells<br>R14 <sup>Δ/Δ</sup> DWORF <sup>Tg</sup> n=4 mice, 82 cells                                               | 1.36E-03 | Yes |
| R14 <sup>Δ/Δ</sup> versus R14 <sup>Δ/Δ</sup> DWORF <sup>Tg</sup>                           | R14 <sup>Δ/Δ</sup> n=4 mice, 93 cells<br>R14 <sup>Δ/Δ</sup> DWORF <sup>Tg</sup> n=4 mice, 82 cells                               | 1.00     | No  |
| WT-ISO versus WT+ISO                                                                       | WT-ISO n=4 mice, 76 cells<br>WT+ISO n=4 mice, 27 cells                                                                           | 7.37E-06 | Yes |
| R14 <sup>Δ/Δ</sup> -ISO versus R14 <sup>Δ/Δ</sup> +ISO                                     | R14 <sup>Δ/Δ</sup> -ISO n=4 mice, 93 cells<br>R14 <sup>Δ/Δ</sup> +ISO n=4 mice, 43 cells                                         | 2.37E-02 | Yes |
| R14 <sup>Δ/Δ</sup> DWORF <sup>Tg</sup> -ISO vs R14 <sup>Δ/Δ</sup> DWORF <sup>Tg</sup> +ISO | R14 <sup>Δ/Δ</sup> DWORF <sup>Tg</sup> -ISO n=4 mice, 82 cells<br>R14 <sup>Δ/Δ</sup> DWORF <sup>Tg</sup> +ISO n=4 mice, 35 cells | 1.84E-01 | No  |



**Comparisons Figure 3D:**

| Comparison                                                                                 | Sample size                                                                                                                      | P-value  | Significant |
|--------------------------------------------------------------------------------------------|----------------------------------------------------------------------------------------------------------------------------------|----------|-------------|
| <b>Fractional shortening</b>                                                               |                                                                                                                                  |          |             |
| WT versus R14 <sup>Δ/Δ</sup>                                                               | WT n=4 mice, 92 cells<br>R14 <sup>Δ/Δ</sup> n=4 mice, 102 cells                                                                  | 2.18E-03 | Yes         |
| WT versus R14 <sup>Δ/Δ</sup> DWORF <sup>Tg</sup>                                           | WT n=4 mice, 92 cells<br>R14 <sup>Δ/Δ</sup> DWORF <sup>Tg</sup> n=4 mice, 86 cells                                               | 6.29E-06 | Yes         |
| R14 <sup>Δ/Δ</sup> versus R14 <sup>Δ/Δ</sup> DWORF <sup>Tg</sup>                           | R14 <sup>Δ/Δ</sup> n=4 mice, 102 cells<br>R14 <sup>Δ/Δ</sup> DWORF <sup>Tg</sup> n=4 mice, 86 cells                              | 7.31E-01 | No          |
| WT-ISO versus WT+ISO                                                                       | WT-ISO n=4 mice, 92 cells<br>WT+ISO n=4 mice, 31 cells                                                                           | 3.06E-16 | Yes         |
| R14 <sup>Δ/Δ</sup> -ISO versus R14 <sup>Δ/Δ</sup> +ISO                                     | R14 <sup>Δ/Δ</sup> -ISO n=4 mice, 102 cells<br>R14 <sup>Δ/Δ</sup> +ISO n=4 mice, 45 cells                                        | 5.61E-12 | Yes         |
| R14 <sup>Δ/Δ</sup> DWORF <sup>Tg</sup> -ISO vs R14 <sup>Δ/Δ</sup> DWORF <sup>Tg</sup> +ISO | R14 <sup>Δ/Δ</sup> DWORF <sup>Tg</sup> -ISO n=4 mice, 86 cells<br>R14 <sup>Δ/Δ</sup> DWORF <sup>Tg</sup> +ISO n=4 mice, 35 cells | 1.21E-08 | Yes         |
| <b>Time to baseline 80%</b>                                                                |                                                                                                                                  |          |             |
| WT versus R14 <sup>Δ/Δ</sup>                                                               | WT n=4 mice, 89 cells<br>R14 <sup>Δ/Δ</sup> n=4 mice, 96 cells                                                                   | 3.05E-02 | Yes         |
| WT versus R14 <sup>Δ/Δ</sup> DWORF <sup>Tg</sup>                                           | WT n=4 mice, 89 cells<br>R14 <sup>Δ/Δ</sup> DWORF <sup>Tg</sup> n=4 mice, 83 cells                                               | 4.04E-01 | No          |
| R14 <sup>Δ/Δ</sup> versus R14 <sup>Δ/Δ</sup> DWORF <sup>Tg</sup>                           | R14 <sup>Δ/Δ</sup> n=4 mice, 96 cells<br>R14 <sup>Δ/Δ</sup> DWORF <sup>Tg</sup> n=4 mice, 83 cells                               | 1.00     | No          |
| WT-ISO versus WT+ISO                                                                       | WT-ISO n=4 mice, 89 cells<br>WT+ISO n=4 mice, 30 cells                                                                           | 1.00     | No          |
| R14 <sup>Δ/Δ</sup> -ISO versus R14 <sup>Δ/Δ</sup> +ISO                                     | R14 <sup>Δ/Δ</sup> -ISO n=4 mice, 96 cells<br>R14 <sup>Δ/Δ</sup> +ISO n=4 mice, 45 cells                                         | 1.00E-01 | No          |
| R14 <sup>Δ/Δ</sup> DWORF <sup>Tg</sup> -ISO vs R14 <sup>Δ/Δ</sup> DWORF <sup>Tg</sup> +ISO | R14 <sup>Δ/Δ</sup> DWORF <sup>Tg</sup> -ISO n=4 mice, 83 cells<br>R14 <sup>Δ/Δ</sup> DWORF <sup>Tg</sup> +ISO n=4 mice, 35 cells | 1.41E-01 | No          |
| <b>Relaxation velocity</b>                                                                 |                                                                                                                                  |          |             |
| WT versus R14 <sup>Δ/Δ</sup>                                                               | WT n=4 mice, 91 cells<br>R14 <sup>Δ/Δ</sup> n=4 mice, 102 cells                                                                  | 1.95E-06 | Yes         |
| WT versus R14 <sup>Δ/Δ</sup> DWORF <sup>Tg</sup>                                           | WT n=4 mice, 91 cells                                                                                                            | 1.18E-07 | Yes         |

|                                                                                            |                                                                                                                                  |          |     |
|--------------------------------------------------------------------------------------------|----------------------------------------------------------------------------------------------------------------------------------|----------|-----|
|                                                                                            | R14 <sup>Δ/Δ</sup> DWORF <sup>Tg</sup> n=4 mice, 86 cells                                                                        |          |     |
| R14 <sup>Δ/Δ</sup> versus R14 <sup>Δ/Δ</sup> DWORF <sup>Tg</sup>                           | R14 <sup>Δ/Δ</sup> n=4 mice, 102 cells<br>R14 <sup>Δ/Δ</sup> DWORF <sup>Tg</sup> n=4 mice, 86 cells                              | 1.00     | No  |
| WT-ISO versus WT+ISO                                                                       | WT-ISO n=4 mice, 91 cells<br>WT+ISO n=4 mice, 31 cells                                                                           | 1.72E-09 | Yes |
| R14 <sup>Δ/Δ</sup> -ISO versus R14 <sup>Δ/Δ</sup> +ISO                                     | R14 <sup>Δ/Δ</sup> -ISO n=4 mice, 102 cells<br>R14 <sup>Δ/Δ</sup> +ISO n=4 mice, 45 cells                                        | 3.09E-03 | Yes |
| R14 <sup>Δ/Δ</sup> DWORF <sup>Tg</sup> -ISO vs R14 <sup>Δ/Δ</sup> DWORF <sup>Tg</sup> +ISO | R14 <sup>Δ/Δ</sup> DWORF <sup>Tg</sup> -ISO n=4 mice, 86 cells<br>R14 <sup>Δ/Δ</sup> DWORF <sup>Tg</sup> +ISO n=4 mice, 35 cells | 8.69E-02 | No  |

#### Comparisons Figure 4B:

| Comparison                                                              | Sample size                                                        | P-value   | Significant |
|-------------------------------------------------------------------------|--------------------------------------------------------------------|-----------|-------------|
| 7 wks: WT versus R14 <sup>Δ/Δ</sup>                                     | WT n=7, R14 <sup>Δ/Δ</sup> n=6                                     | 2.14e-005 | Yes         |
| 7 wks: WT versus R14 <sup>Δ/Δ</sup> DWORF <sup>Tg</sup>                 | WT n=7, R14 <sup>Δ/Δ</sup> DWORF <sup>Tg</sup> n=7                 | 2.18e-002 | Yes         |
| 7 wks: R14 <sup>Δ/Δ</sup> versus R14 <sup>Δ/Δ</sup> DWORF <sup>Tg</sup> | R14 <sup>Δ/Δ</sup> n=6, R14 <sup>Δ/Δ</sup> DWORF <sup>Tg</sup> n=7 | 4.07e-002 | Yes         |
|                                                                         |                                                                    |           |             |
| 18 wks: WT versus R14 <sup>Δ/Δ</sup> DWORF <sup>Tg</sup>                | WT n=8, R14 <sup>Δ/Δ</sup> DWORF <sup>Tg</sup> n=9                 | 8.23e-005 | Yes         |

#### Comparisons Figure 4D:

| Comparison                                                              | Sample size                                                        | P-value   | Significant |
|-------------------------------------------------------------------------|--------------------------------------------------------------------|-----------|-------------|
| 7 wks: WT versus R14 <sup>Δ/Δ</sup>                                     | WT n=4, R14 <sup>Δ/Δ</sup> n=4                                     | 7.19e-002 | Yes         |
| 7 wks: WT versus R14 <sup>Δ/Δ</sup> DWORF <sup>Tg</sup>                 | WT n=4, R14 <sup>Δ/Δ</sup> DWORF <sup>Tg</sup> n=4                 | 2.70e-003 | No          |
| 7 wks: R14 <sup>Δ/Δ</sup> versus R14 <sup>Δ/Δ</sup> DWORF <sup>Tg</sup> | R14 <sup>Δ/Δ</sup> n=4, R14 <sup>Δ/Δ</sup> DWORF <sup>Tg</sup> n=4 | 2.30e-001 | Yes         |
|                                                                         |                                                                    |           |             |
| 18 wks: WT versus R14 <sup>Δ/Δ</sup> DWORF <sup>Tg</sup>                | WT n=4, R14 <sup>Δ/Δ</sup> DWORF <sup>Tg</sup> n=4                 | 2.86e-002 | Yes         |

#### Comparisons Figure 7D:

| Comparison                                                       | Sample size                                                        | P-value   | Significant |
|------------------------------------------------------------------|--------------------------------------------------------------------|-----------|-------------|
| WT versus R14 <sup>Δ/Δ</sup>                                     | WT n=3, R14 <sup>Δ/Δ</sup> n=4                                     | 4.43e-003 | Yes         |
| WT versus R14 <sup>Δ/Δ</sup> DWORF <sup>Tg</sup>                 | WT n=3, R14 <sup>Δ/Δ</sup> DWORF <sup>Tg</sup> n=3                 | 2.19e-001 | No          |
| R14 <sup>Δ/Δ</sup> versus R14 <sup>Δ/Δ</sup> DWORF <sup>Tg</sup> | R14 <sup>Δ/Δ</sup> n=4, R14 <sup>Δ/Δ</sup> DWORF <sup>Tg</sup> n=3 | 1.25e-001 | No          |

**Comparisons Figure 7E:**

| Comparison                                                       | Sample size                                                        | P-value    | Significant |
|------------------------------------------------------------------|--------------------------------------------------------------------|------------|-------------|
| WT versus R14 <sup>Δ/Δ</sup>                                     | WT n=6, R14 <sup>Δ/Δ</sup> n=7                                     | >9.99e-001 | No          |
| WT versus R14 <sup>Δ/Δ</sup> DWORF <sup>Tg</sup>                 | WT n=6, R14 <sup>Δ/Δ</sup> DWORF <sup>Tg</sup> n=7                 | 8.27e-002  | No          |
| R14 <sup>Δ/Δ</sup> versus R14 <sup>Δ/Δ</sup> DWORF <sup>Tg</sup> | R14 <sup>Δ/Δ</sup> n=7, R14 <sup>Δ/Δ</sup> DWORF <sup>Tg</sup> n=7 | 8.27e-002  | No          |

**Comparisons Figure 7F:**

| Comparison                                                       | Sample size                                                        | P-value   | Significant |
|------------------------------------------------------------------|--------------------------------------------------------------------|-----------|-------------|
| WT versus R14 <sup>Δ/Δ</sup>                                     | WT n=6, R14 <sup>Δ/Δ</sup> n=7                                     | 4.73e-005 | Yes         |
| WT versus R14 <sup>Δ/Δ</sup> DWORF <sup>Tg</sup>                 | WT n=6, R14 <sup>Δ/Δ</sup> DWORF <sup>Tg</sup> n=7                 | 3.67e-002 | Yes         |
| R14 <sup>Δ/Δ</sup> versus R14 <sup>Δ/Δ</sup> DWORF <sup>Tg</sup> | R14 <sup>Δ/Δ</sup> n=7, R14 <sup>Δ/Δ</sup> DWORF <sup>Tg</sup> n=7 | 3.94e-002 | Yes         |

**Comparisons Figure S1A:**

| Comparison                   | Sample size                      | P-value   | Significant |
|------------------------------|----------------------------------|-----------|-------------|
| 3 weeks                      |                                  |           |             |
| WT versus R14 <sup>Δ/Δ</sup> | WT n=7, R14 <sup>Δ/Δ</sup> n=6   | 2.95e-001 | No          |
| 4 weeks                      |                                  |           |             |
| WT versus R14 <sup>Δ/Δ</sup> | WT n=9, R14 <sup>Δ/Δ</sup> n=11  | 2.26e-004 | Yes         |
| 5 weeks                      |                                  |           |             |
| WT versus R14 <sup>Δ/Δ</sup> | WT n=10, R14 <sup>Δ/Δ</sup> n=12 | 3.09e-006 | Yes         |
| 6 weeks                      |                                  |           |             |
| WT versus R14 <sup>Δ/Δ</sup> | WT n=10, R14 <sup>Δ/Δ</sup> n=12 | 3.09e-006 | Yes         |
| 7 weeks                      |                                  |           |             |
| WT versus R14 <sup>Δ/Δ</sup> | WT n=3, R14 <sup>Δ/Δ</sup> n=7   | 1.67e-002 | Yes         |

**Comparisons Figure S1B:**

| Comparison                                | Sample size                                 | P-value    | Significant |
|-------------------------------------------|---------------------------------------------|------------|-------------|
| Sham (WT) versus I/R (WT)                 | Sham (WT) n=7, I/R (WT) n=8                 | >9.99e-001 | No          |
| Sham (WT) versus MI (WT)                  | Sham (WT) n=7, MI (WT) n=9                  | 2.54e-002  | Yes         |
| Sham (WT) versus R14 <sup>Δ/Δ</sup> (7wk) | Sham (WT) n=7, R14 <sup>Δ/Δ</sup> (7wk) n=7 | 9.80e-005  | Yes         |
| MI (WT) versus R14 <sup>Δ/Δ</sup> (7wk)   | MI (WT) n=9, R14 <sup>Δ/Δ</sup> (7wk) n=7   | 3.23e-001  | No          |

**Comparisons Figure S1D:**

| Comparison                                                       | Sample size                                                        | P-value   | Significant |
|------------------------------------------------------------------|--------------------------------------------------------------------|-----------|-------------|
| WT versus R14 <sup>Δ/Δ</sup>                                     | WT n=4, R14 <sup>Δ/Δ</sup> n=4                                     | 1.70e-001 | No          |
| WT versus R14 <sup>Δ/Δ</sup> DWORF <sup>Tg</sup>                 | WT n=4, R14 <sup>Δ/Δ</sup> DWORF <sup>Tg</sup> n=4                 | 9.55e-002 | No          |
| R14 <sup>Δ/Δ</sup> versus R14 <sup>Δ/Δ</sup> DWORF <sup>Tg</sup> | R14 <sup>Δ/Δ</sup> n=4, R14 <sup>Δ/Δ</sup> DWORF <sup>Tg</sup> n=4 | 2.37e-003 | Yes         |

**Comparisons Figure S2A:**

| Comparison                                                              | Sample size                                                         | P-value    | Significant |
|-------------------------------------------------------------------------|---------------------------------------------------------------------|------------|-------------|
| 3 wks: WT versus R14 <sup>Δ/Δ</sup>                                     | WT n=3, R14 <sup>Δ/Δ</sup> n=3                                      | >9.99e-001 | No          |
| 3 wks: WT versus R14 <sup>Δ/Δ</sup> DWORF <sup>Tg</sup>                 | WT n=3, R14 <sup>Δ/Δ</sup> DWORF <sup>Tg</sup> n=4                  | 4.73e-002  | Yes         |
| 3 wks: R14 <sup>Δ/Δ</sup> versus R14 <sup>Δ/Δ</sup> DWORF <sup>Tg</sup> | R14 <sup>Δ/Δ</sup> n=3, R14 <sup>Δ/Δ</sup> DWORF <sup>Tg</sup> n=4  | 3.64e-001  | No          |
|                                                                         |                                                                     |            |             |
| 5 wks: WT versus R14 <sup>Δ/Δ</sup>                                     | WT n=9, R14 <sup>Δ/Δ</sup> n=9                                      | >9.99e-001 | No          |
| 5 wks: WT versus R14 <sup>Δ/Δ</sup> DWORF <sup>Tg</sup>                 | WT n=9, R14 <sup>Δ/Δ</sup> DWORF <sup>Tg</sup> n=11                 | >9.99e-001 | No          |
| 5 wks: R14 <sup>Δ/Δ</sup> versus R14 <sup>Δ/Δ</sup> DWORF <sup>Tg</sup> | R14 <sup>Δ/Δ</sup> n=9, R14 <sup>Δ/Δ</sup> DWORF <sup>Tg</sup> n=11 | 7.69e-001  | No          |
|                                                                         |                                                                     |            |             |
| 7 wks: WT versus R14 <sup>Δ/Δ</sup>                                     | WT n=10, R14 <sup>Δ/Δ</sup> n=5                                     | 1.88e-001  | No          |
| 7 wks: WT versus R14 <sup>Δ/Δ</sup> DWORF <sup>Tg</sup>                 | WT n=10, R14 <sup>Δ/Δ</sup> DWORF <sup>Tg</sup> n=10                | 4.52e-002  | Yes         |
| 7 wks: R14 <sup>Δ/Δ</sup> versus R14 <sup>Δ/Δ</sup> DWORF <sup>Tg</sup> | R14 <sup>Δ/Δ</sup> n=5, R14 <sup>Δ/Δ</sup> DWORF <sup>Tg</sup> n=10 | 3.60e-004  | Yes         |
|                                                                         |                                                                     |            |             |
| 18 wks: WT versus R14 <sup>Δ/Δ</sup> DWORF <sup>Tg</sup>                | WT n=4, R14 <sup>Δ/Δ</sup> DWORF <sup>Tg</sup> n=3                  | 8.57e-001  | No          |

**Comparisons Figure S2B:**

| Comparison                                                              | Sample size                                                         | P-value    | Significant |
|-------------------------------------------------------------------------|---------------------------------------------------------------------|------------|-------------|
| 3 wks: WT versus R14 <sup>Δ/Δ</sup>                                     | WT n=3, R14 <sup>Δ/Δ</sup> n=3                                      | 2.39e-001  | No          |
| 3 wks: WT versus R14 <sup>Δ/Δ</sup> DWORF <sup>Tg</sup>                 | WT n=3, R14 <sup>Δ/Δ</sup> DWORF <sup>Tg</sup> n=4                  | 5.22e-002  | No          |
| 3 wks: R14 <sup>Δ/Δ</sup> versus R14 <sup>Δ/Δ</sup> DWORF <sup>Tg</sup> | R14 <sup>Δ/Δ</sup> n=3, R14 <sup>Δ/Δ</sup> DWORF <sup>Tg</sup> n=4  | >9.99e-001 | No          |
|                                                                         |                                                                     |            |             |
| 5 wks: WT versus R14 <sup>Δ/Δ</sup>                                     | WT n=9, R14 <sup>Δ/Δ</sup> n=9                                      | 9.91e-002  | No          |
| 5 wks: WT versus R14 <sup>Δ/Δ</sup> DWORF <sup>Tg</sup>                 | WT n=9, R14 <sup>Δ/Δ</sup> DWORF <sup>Tg</sup> n=11                 | 1.35e-002  | Yes         |
| 5 wks: R14 <sup>Δ/Δ</sup> versus R14 <sup>Δ/Δ</sup> DWORF <sup>Tg</sup> | R14 <sup>Δ/Δ</sup> n=9, R14 <sup>Δ/Δ</sup> DWORF <sup>Tg</sup> n=11 | >9.99e-001 | No          |
|                                                                         |                                                                     |            |             |

|                                                                         |                                                                     |           |     |
|-------------------------------------------------------------------------|---------------------------------------------------------------------|-----------|-----|
| 7 wks: WT versus R14 <sup>Δ/Δ</sup>                                     | WT n=10, R14 <sup>Δ/Δ</sup> n=5                                     | 3.27e-004 | Yes |
| 7 wks: WT versus R14 <sup>Δ/Δ</sup> DWORF <sup>Tg</sup>                 | WT n=10, R14 <sup>Δ/Δ</sup> DWORF <sup>Tg</sup> n=10                | 5.79e-002 | No  |
| 7 wks: R14 <sup>Δ/Δ</sup> versus R14 <sup>Δ/Δ</sup> DWORF <sup>Tg</sup> | R14 <sup>Δ/Δ</sup> n=5, R14 <sup>Δ/Δ</sup> DWORF <sup>Tg</sup> n=10 | 1.50e-001 | No  |
|                                                                         |                                                                     |           |     |
| 18 wks: WT versus R14 <sup>Δ/Δ</sup> DWORF <sup>Tg</sup>                | WT n=4, R14 <sup>Δ/Δ</sup> DWORF <sup>Tg</sup> n=4                  | 2.86e-002 | Yes |

### Comparisons Figure S2C:

| Comparison                                                              | Sample size                                                         | P-value    | Significant |
|-------------------------------------------------------------------------|---------------------------------------------------------------------|------------|-------------|
| 3 wks: WT versus R14 <sup>Δ/Δ</sup>                                     | WT n=3, R14 <sup>Δ/Δ</sup> n=3                                      | 6.57e-002  | No          |
| 3 wks: WT versus R14 <sup>Δ/Δ</sup> DWORF <sup>Tg</sup>                 | WT n=3, R14 <sup>Δ/Δ</sup> DWORF <sup>Tg</sup> n=4                  | 1.55e-001  | No          |
| 3 wks: R14 <sup>Δ/Δ</sup> versus R14 <sup>Δ/Δ</sup> DWORF <sup>Tg</sup> | R14 <sup>Δ/Δ</sup> n=3, R14 <sup>Δ/Δ</sup> DWORF <sup>Tg</sup> n=4  | >9.99e-001 | No          |
|                                                                         |                                                                     |            |             |
| 5 wks: WT versus R14 <sup>Δ/Δ</sup>                                     | WT n=9, R14 <sup>Δ/Δ</sup> n=9                                      | >9.99e-001 | No          |
| 5 wks: WT versus R14 <sup>Δ/Δ</sup> DWORF <sup>Tg</sup>                 | WT n=9, R14 <sup>Δ/Δ</sup> DWORF <sup>Tg</sup> n=11                 | 3.54e-002  | Yes         |
| 5 wks: R14 <sup>Δ/Δ</sup> versus R14 <sup>Δ/Δ</sup> DWORF <sup>Tg</sup> | R14 <sup>Δ/Δ</sup> n=9, R14 <sup>Δ/Δ</sup> DWORF <sup>Tg</sup> n=11 | 7.77e-002  | No          |
|                                                                         |                                                                     |            |             |
| 7 wks: WT versus R14 <sup>Δ/Δ</sup>                                     | WT n=10, R14 <sup>Δ/Δ</sup> n=5                                     | 2.91e-003  | Yes         |
| 7 wks: WT versus R14 <sup>Δ/Δ</sup> DWORF <sup>Tg</sup>                 | WT n=10, R14 <sup>Δ/Δ</sup> DWORF <sup>Tg</sup> n=10                | >9.99e-001 | No          |
| 7 wks: R14 <sup>Δ/Δ</sup> versus R14 <sup>Δ/Δ</sup> DWORF <sup>Tg</sup> | R14 <sup>Δ/Δ</sup> n=5, R14 <sup>Δ/Δ</sup> DWORF <sup>Tg</sup> n=10 | 1.64e-002  | Yes         |
|                                                                         |                                                                     |            |             |
| 18 wks: WT versus R14 <sup>Δ/Δ</sup> DWORF <sup>Tg</sup>                | WT n=4, R14 <sup>Δ/Δ</sup> DWORF <sup>Tg</sup> n=4                  | 1.14e-001  | No          |

### Comparisons Figure S3B:

| Comparison                                               | Sample size                                                                                | P-value  | Significant |
|----------------------------------------------------------|--------------------------------------------------------------------------------------------|----------|-------------|
| WT versus DWORF <sup>Tg</sup>                            | WT n=4 mice, 82 cells<br>DWORF <sup>Tg</sup> n=4 mice, 91 cells                            | 1.69E-06 | Yes         |
| WT-ISO versus WT+ISO                                     | WT-ISO n=4 mice, 82 cells<br>WT+ISO n=4 mice, 27 cells                                     | 1.93E-16 | Yes         |
| DWORF <sup>Tg</sup> -ISO versus DWORF <sup>Tg</sup> +ISO | DWORF <sup>Tg</sup> -ISO n=4 mice, 91 cells<br>DWORF <sup>Tg</sup> +ISO n=4 mice, 36 cells | 1.09E-13 | Yes         |

**Comparisons Figure S3D:**

| Comparison                                               | Sample size                                                                                | P-value  | Significant |
|----------------------------------------------------------|--------------------------------------------------------------------------------------------|----------|-------------|
| WT versus DWORF <sup>Tg</sup>                            | WT n=4 mice, 92 cells<br>DWORF <sup>Tg</sup> n=4 mice, 94 cells                            | 3.58E-02 | Yes         |
| WT-ISO versus WT+ISO                                     | WT-ISO n=4 mice, 92 cells<br>WT+ISO n=4 mice, 31 cells                                     | 2.19E-05 | Yes         |
| DWORF <sup>Tg</sup> -ISO versus DWORF <sup>Tg</sup> +ISO | DWORF <sup>Tg</sup> -ISO n=4 mice, 94 cells<br>DWORF <sup>Tg</sup> +ISO n=4 mice, 39 cells | 1.35E-03 | Yes         |

**Comparisons Figure S4A:**

| Comparison                                                              | Sample size                                                        | P-value   | Significant |
|-------------------------------------------------------------------------|--------------------------------------------------------------------|-----------|-------------|
| 3 wks: WT versus R14 <sup>Δ/Δ</sup>                                     | WT n=5, R14 <sup>Δ/Δ</sup> n=4                                     | 9.15e-001 | No          |
| 3 wks: WT versus R14 <sup>Δ/Δ</sup> DWORF <sup>Tg</sup>                 | WT n=5, R14 <sup>Δ/Δ</sup> DWORF <sup>Tg</sup> n=5                 | 1.99e-001 | No          |
| 3 wks: R14 <sup>Δ/Δ</sup> versus R14 <sup>Δ/Δ</sup> DWORF <sup>Tg</sup> | R14 <sup>Δ/Δ</sup> n=4, R14 <sup>Δ/Δ</sup> DWORF <sup>Tg</sup> n=5 | 2.69e-001 | No          |
|                                                                         |                                                                    |           |             |
| 6 wks: WT versus R14 <sup>Δ/Δ</sup>                                     | WT n=4, R14 <sup>Δ/Δ</sup> n=4                                     | 2.74e-003 | Yes         |
| 6 wks: WT versus R14 <sup>Δ/Δ</sup> DWORF <sup>Tg</sup>                 | WT n=4, R14 <sup>Δ/Δ</sup> DWORF <sup>Tg</sup> n=5                 | 5.09e-002 | No          |
| 6 wks: R14 <sup>Δ/Δ</sup> versus R14 <sup>Δ/Δ</sup> DWORF <sup>Tg</sup> | R14 <sup>Δ/Δ</sup> n=4, R14 <sup>Δ/Δ</sup> DWORF <sup>Tg</sup> n=5 | 2.28e-001 | No          |

**Comparisons Figure S4C:**

| Comparison                                                                                 | Sample size                                                                                        | P-value  | Significant |
|--------------------------------------------------------------------------------------------|----------------------------------------------------------------------------------------------------|----------|-------------|
| WT versus R14 <sup>Δ/Δ</sup>                                                               | WT n=3 mice, 73 cells<br>R14 <sup>Δ/Δ</sup> n=3 mice, 58 cells                                     | 2.18E-05 | Yes         |
| WT versus R14 <sup>Δ/Δ</sup> DWORF <sup>Tg</sup>                                           | WT n=3 mice, 73 cells<br>R14 <sup>Δ/Δ</sup> DWORF <sup>Tg</sup> n=4 mice, 91 cells                 | 1.40E-05 | Yes         |
| R14 <sup>Δ/Δ</sup> versus R14 <sup>Δ/Δ</sup> DWORF <sup>Tg</sup>                           | R14 <sup>Δ/Δ</sup> n=3 mice, 58 cells<br>R14 <sup>Δ/Δ</sup> DWORF <sup>Tg</sup> n=4 mice, 91 cells | 1.00     | No          |
| WT-ISO versus WT+ISO                                                                       | WT-ISO n=3 mice, 73 cells<br>WT+ISO n=3 mice, 30 cells                                             | 6.08E-08 | Yes         |
| R14 <sup>Δ/Δ</sup> -ISO versus R14 <sup>Δ/Δ</sup> +ISO                                     | R14 <sup>Δ/Δ</sup> -ISO n=3 mice, 58 cells<br>R14 <sup>Δ/Δ</sup> +ISO n=3 mice, 26 cells           | 1.00     | No          |
| R14 <sup>Δ/Δ</sup> DWORF <sup>Tg</sup> -ISO vs R14 <sup>Δ/Δ</sup> DWORF <sup>Tg</sup> +ISO | R14 <sup>Δ/Δ</sup> DWORF <sup>Tg</sup> -ISO n=4 mice, 91 cells                                     | 2.98E-02 | Yes         |

|  |                                                                |  |  |
|--|----------------------------------------------------------------|--|--|
|  | R14 <sup>Δ/Δ</sup> DWORF <sup>Tg</sup> +ISO n=4 mice, 41 cells |  |  |
|--|----------------------------------------------------------------|--|--|

**Comparisons Figure S4E:**

| Comparison                                                                                 | Sample size                                                                                                                      | P-value  | Significant |
|--------------------------------------------------------------------------------------------|----------------------------------------------------------------------------------------------------------------------------------|----------|-------------|
| <b>Fractional shortening</b>                                                               |                                                                                                                                  |          |             |
| WT versus R14 <sup>Δ/Δ</sup>                                                               | WT n=4 mice, 97 cells<br>R14 <sup>Δ/Δ</sup> n=3 mice, 57 cells                                                                   | 6.66E-01 | No          |
| WT versus R14 <sup>Δ/Δ</sup> DWORF <sup>Tg</sup>                                           | WT n=4 mice, 97 cells<br>R14 <sup>Δ/Δ</sup> DWORF <sup>Tg</sup> n=4 mice, 90 cells                                               | 1.00     | No          |
| R14 <sup>Δ/Δ</sup> versus R14 <sup>Δ/Δ</sup> DWORF <sup>Tg</sup>                           | R14 <sup>Δ/Δ</sup> n=3 mice, 57 cells<br>R14 <sup>Δ/Δ</sup> DWORF <sup>Tg</sup> n=4 mice, 90 cells                               | 1.00     | No          |
| WT-ISO versus WT+ISO                                                                       | WT-ISO n=4 mice, 97 cells<br>WT+ISO n=4 mice, 42 cells                                                                           | 5.78E-06 | Yes         |
| R14 <sup>Δ/Δ</sup> -ISO versus R14 <sup>Δ/Δ</sup> +ISO                                     | R14 <sup>Δ/Δ</sup> -ISO n=3 mice, 57 cells<br>R14 <sup>Δ/Δ</sup> +ISO n=3 mice, 25 cells                                         | 1.00     | No          |
| R14 <sup>Δ/Δ</sup> DWORF <sup>Tg</sup> -ISO vs R14 <sup>Δ/Δ</sup> DWORF <sup>Tg</sup> +ISO | R14 <sup>Δ/Δ</sup> DWORF <sup>Tg</sup> -ISO n=4 mice, 90 cells<br>R14 <sup>Δ/Δ</sup> DWORF <sup>Tg</sup> +ISO n=4 mice, 41 cells | 8.22E-04 | Yes         |
| <b>Time to baseline 80%</b>                                                                |                                                                                                                                  |          |             |
| WT versus R14 <sup>Δ/Δ</sup>                                                               | WT n=4 mice, 96 cells<br>R14 <sup>Δ/Δ</sup> n=3 mice, 57 cells                                                                   | 1.00     | No          |
| WT versus R14 <sup>Δ/Δ</sup> DWORF <sup>Tg</sup>                                           | WT n=4 mice, 96 cells<br>R14 <sup>Δ/Δ</sup> DWORF <sup>Tg</sup> n=4 mice, 87 cells                                               | 6.32E-02 | No          |
| R14 <sup>Δ/Δ</sup> versus R14 <sup>Δ/Δ</sup> DWORF <sup>Tg</sup>                           | R14 <sup>Δ/Δ</sup> n=3 mice, 57 cells<br>R14 <sup>Δ/Δ</sup> DWORF <sup>Tg</sup> n=4 mice, 87 cells                               | 7.10E-02 | No          |
| WT-ISO versus WT+ISO                                                                       | WT-ISO n=4 mice, 96 cells<br>WT+ISO n=4 mice, 42 cells                                                                           | 1.43E-01 | No          |
| R14 <sup>Δ/Δ</sup> -ISO versus R14 <sup>Δ/Δ</sup> +ISO                                     | R14 <sup>Δ/Δ</sup> -ISO n=3 mice, 57 cells<br>R14 <sup>Δ/Δ</sup> +ISO n=3 mice, 25 cells                                         | 5.30E-01 | No          |
| R14 <sup>Δ/Δ</sup> DWORF <sup>Tg</sup> -ISO vs R14 <sup>Δ/Δ</sup> DWORF <sup>Tg</sup> +ISO | R14 <sup>Δ/Δ</sup> DWORF <sup>Tg</sup> -ISO n=4 mice, 87 cells<br>R14 <sup>Δ/Δ</sup> DWORF <sup>Tg</sup> +ISO n=4 mice, 41 cells | 1.93E-01 | No          |
| <b>Relaxation velocity</b>                                                                 |                                                                                                                                  |          |             |
| WT versus R14 <sup>Δ/Δ</sup>                                                               | WT n=4 mice, 98 cells                                                                                                            | 1.00     | No          |

|                                                                                            |                                                                                                                                  |          |     |
|--------------------------------------------------------------------------------------------|----------------------------------------------------------------------------------------------------------------------------------|----------|-----|
|                                                                                            | R14 <sup>Δ/Δ</sup> n=3 mice, 57 cells                                                                                            |          |     |
| WT versus R14 <sup>Δ/Δ</sup> DWORF <sup>Tg</sup>                                           | WT n=4 mice, 98 cells<br>R14 <sup>Δ/Δ</sup> DWORF <sup>Tg</sup> n=4 mice, 90 cells                                               | 2.88E-01 | No  |
| R14 <sup>Δ/Δ</sup> versus R14 <sup>Δ/Δ</sup> DWORF <sup>Tg</sup>                           | R14 <sup>Δ/Δ</sup> n=3 mice, 57 cells<br>R14 <sup>Δ/Δ</sup> DWORF <sup>Tg</sup> n=4 mice, 90 cells                               | 1.00     | No  |
| WT-ISO versus WT+ISO                                                                       | WT-ISO n=4 mice, 98 cells<br>WT+ISO n=4 mice, 42 cells                                                                           | 2.31E-06 | Yes |
| R14 <sup>Δ/Δ</sup> -ISO versus R14 <sup>Δ/Δ</sup> +ISO                                     | R14 <sup>Δ/Δ</sup> -ISO n=3 mice, 57 cells<br>R14 <sup>Δ/Δ</sup> +ISO n=3 mice, 24 cells                                         | 1.00     | No  |
| R14 <sup>Δ/Δ</sup> DWORF <sup>Tg</sup> -ISO vs R14 <sup>Δ/Δ</sup> DWORF <sup>Tg</sup> +ISO | R14 <sup>Δ/Δ</sup> DWORF <sup>Tg</sup> -ISO n=4 mice, 90 cells<br>R14 <sup>Δ/Δ</sup> DWORF <sup>Tg</sup> +ISO n=4 mice, 41 cells | 6.72E-02 | No  |

#### **Comparisons Figure S13A:**

| <b>Comparison</b>                                                | <b>Sample size</b>                                                 | <b>P-value</b> | <b>Significant</b> |
|------------------------------------------------------------------|--------------------------------------------------------------------|----------------|--------------------|
| WT versus R14 <sup>Δ/Δ</sup>                                     | WT n=5, R14 <sup>Δ/Δ</sup> n=5                                     | 4.85e-004      | Yes                |
| WT versus R14 <sup>Δ/Δ</sup> DWORF <sup>Tg</sup>                 | WT n=5, R14 <sup>Δ/Δ</sup> DWORF <sup>Tg</sup> n=5                 | 1.42e-001      | No                 |
| R14 <sup>Δ/Δ</sup> versus R14 <sup>Δ/Δ</sup> DWORF <sup>Tg</sup> | R14 <sup>Δ/Δ</sup> n=5, R14 <sup>Δ/Δ</sup> DWORF <sup>Tg</sup> n=5 | 4.34e-002      | Yes                |

#### **Comparisons Figure S13B:**

| <b>Comparison</b>                                                | <b>Sample size</b>                                                 | <b>P-value</b> | <b>Significant</b> |
|------------------------------------------------------------------|--------------------------------------------------------------------|----------------|--------------------|
| WT versus R14 <sup>Δ/Δ</sup>                                     | WT n=5, R14 <sup>Δ/Δ</sup> n=5                                     | 9.93e-004      | Yes                |
| WT versus R14 <sup>Δ/Δ</sup> DWORF <sup>Tg</sup>                 | WT n=5, R14 <sup>Δ/Δ</sup> DWORF <sup>Tg</sup> n=5                 | 9.97e-002      | No                 |
| R14 <sup>Δ/Δ</sup> versus R14 <sup>Δ/Δ</sup> DWORF <sup>Tg</sup> | R14 <sup>Δ/Δ</sup> n=5, R14 <sup>Δ/Δ</sup> DWORF <sup>Tg</sup> n=5 | 9.97e-002      | No                 |

#### **Comparisons Figure S13D:**

| <b>Comparison</b>                                                       | <b>Sample size</b>                                                 | <b>P-value</b> | <b>Significant</b> |
|-------------------------------------------------------------------------|--------------------------------------------------------------------|----------------|--------------------|
| 7 wks: WT versus R14 <sup>Δ/Δ</sup>                                     | WT n=4, R14 <sup>Δ/Δ</sup> n=4                                     | 1.67e-003      | Yes                |
| 7 wks: WT versus R14 <sup>Δ/Δ</sup> DWORF <sup>Tg</sup>                 | WT n=4, R14 <sup>Δ/Δ</sup> DWORF <sup>Tg</sup> n=4                 | 1.16e-001      | No                 |
| 7 wks: R14 <sup>Δ/Δ</sup> versus R14 <sup>Δ/Δ</sup> DWORF <sup>Tg</sup> | R14 <sup>Δ/Δ</sup> n=4, R14 <sup>Δ/Δ</sup> DWORF <sup>Tg</sup> n=4 | 1.16e-001      | No                 |



**Comparisons Figure S15B:**

| Comparison                                             | Sample size                                                                               | P-value  | Significant |
|--------------------------------------------------------|-------------------------------------------------------------------------------------------|----------|-------------|
| WT versus R14 <sup>Δ/+</sup>                           | WT n=4 mice, 82 cells<br>R14 <sup>Δ/+</sup> n=5 mice, 119 cells                           | 5.06E-04 | Yes         |
| WT versus R14 <sup>Δ/Δ</sup>                           | WT n=4 mice, 82 cells<br>R14 <sup>Δ/Δ</sup> n=3 mice, 57 cells                            | 4.56E-07 | Yes         |
| R14 <sup>Δ/+</sup> versus R14 <sup>Δ/Δ</sup>           | R14 <sup>Δ/+</sup> n=5 mice, 119 cells<br>R14 <sup>Δ/Δ</sup> n=4 mice, 98 cells           | 9.96E-03 | Yes         |
| WT-ISO versus WT+ISO                                   | WT-ISO n=4 mice, 82 cells<br>WT+ISO n=4 mice, 27 cells                                    | 3.67E-17 | Yes         |
| R14 <sup>Δ/+</sup> -ISO versus R14 <sup>Δ/+</sup> +ISO | R14 <sup>Δ/+</sup> -ISO n=5 mice, 119 cells<br>R14 <sup>Δ/+</sup> +ISO n=5 mice, 53 cells | 2.45E-12 | Yes         |
| R14 <sup>Δ/Δ</sup> -ISO vs R14 <sup>Δ/Δ</sup> +ISO     | R14 <sup>Δ/Δ</sup> -ISO n=4 mice, 98 cells<br>R14 <sup>Δ/Δ</sup> +ISO n=4 mice, 42 cells  | 9.27E-04 | Yes         |

**Comparisons Figure S15C:**

| Comparison                                             | Sample size                                                                               | P-value  | Significant |
|--------------------------------------------------------|-------------------------------------------------------------------------------------------|----------|-------------|
| WT versus R14 <sup>Δ/+</sup>                           | WT n=4 mice, 79 cells<br>R14 <sup>Δ/+</sup> n=5 mice, 114 cells                           | 9.66E-04 | Yes         |
| WT versus R14 <sup>Δ/Δ</sup>                           | WT n=4 mice, 79 cells<br>R14 <sup>Δ/Δ</sup> n=3 mice, 57 cells                            | 1.34E-07 | Yes         |
| R14 <sup>Δ/+</sup> versus R14 <sup>Δ/Δ</sup>           | R14 <sup>Δ/+</sup> n=5 mice, 114 cells<br>R14 <sup>Δ/Δ</sup> n=4 mice, 98 cells           | 1.52E-03 | Yes         |
| WT-ISO versus WT+ISO                                   | WT-ISO n=4 mice, 79 cells<br>WT+ISO n=4 mice, 28 cells                                    | 1.12E-12 | Yes         |
| R14 <sup>Δ/+</sup> -ISO versus R14 <sup>Δ/+</sup> +ISO | R14 <sup>Δ/+</sup> -ISO n=5 mice, 114 cells<br>R14 <sup>Δ/+</sup> +ISO n=5 mice, 53 cells | 2.32E-07 | Yes         |
| R14 <sup>Δ/Δ</sup> -ISO vs R14 <sup>Δ/Δ</sup> +ISO     | R14 <sup>Δ/Δ</sup> -ISO n=4 mice, 98 cells<br>R14 <sup>Δ/Δ</sup> +ISO n=4 mice, 43 cells  | 1.00     | No          |

**Comparisons Figure S15E:**

| Comparison                                             | Sample size                                                                               | P-value  | Significant |
|--------------------------------------------------------|-------------------------------------------------------------------------------------------|----------|-------------|
| WT versus R14 <sup>Δ/+</sup>                           | WT n=4 mice, 92 cells<br>R14 <sup>Δ/+</sup> n=5 mice, 119 cells                           | 3.31E-03 | Yes         |
| WT versus R14 <sup>Δ/Δ</sup>                           | WT n=4 mice, 92 cells<br>R14 <sup>Δ/Δ</sup> n=3 mice, 102 cells                           | 2.02E-03 | Yes         |
| R14 <sup>Δ/+</sup> versus R14 <sup>Δ/Δ</sup>           | R14 <sup>Δ/+</sup> n=5 mice, 119 cells<br>R14 <sup>Δ/Δ</sup> n=4 mice, 102 cells          | 1.00     | No          |
| WT-ISO versus WT+ISO                                   | WT-ISO n=4 mice, 92 cells<br>WT+ISO n=4 mice, 31 cells                                    | 1.56E-16 | Yes         |
| R14 <sup>Δ/+</sup> -ISO versus R14 <sup>Δ/+</sup> +ISO | R14 <sup>Δ/+</sup> -ISO n=5 mice, 119 cells<br>R14 <sup>Δ/+</sup> +ISO n=5 mice, 51 cells | 3.80E-22 | Yes         |
| R14 <sup>Δ/Δ</sup> -ISO vs R14 <sup>Δ/Δ</sup> +ISO     | R14 <sup>Δ/Δ</sup> -ISO n=4 mice, 102 cells<br>R14 <sup>Δ/Δ</sup> +ISO n=4 mice, 45 cells | 3.64E-12 | Yes         |

**Comparisons Figure S15F:**

| Comparison                                             | Sample size                                                                               | P-value  | Significant |
|--------------------------------------------------------|-------------------------------------------------------------------------------------------|----------|-------------|
| WT versus R14 <sup>Δ/+</sup>                           | WT n=4 mice, 89 cells<br>R14 <sup>Δ/+</sup> n=5 mice, 117 cells                           | 1.00     | No          |
| WT versus R14 <sup>Δ/Δ</sup>                           | WT n=4 mice, 89 cells<br>R14 <sup>Δ/Δ</sup> n=3 mice, 96 cells                            | 1.54E-02 | Yes         |
| R14 <sup>Δ/+</sup> versus R14 <sup>Δ/Δ</sup>           | R14 <sup>Δ/+</sup> n=5 mice, 117 cells<br>R14 <sup>Δ/Δ</sup> n=4 mice, 96 cells           | 3.67E-02 | Yes         |
| WT-ISO versus WT+ISO                                   | WT-ISO n=4 mice, 89 cells<br>WT+ISO n=4 mice, 30 cells                                    | 1.00     | No          |
| R14 <sup>Δ/+</sup> -ISO versus R14 <sup>Δ/+</sup> +ISO | R14 <sup>Δ/+</sup> -ISO n=5 mice, 117 cells<br>R14 <sup>Δ/+</sup> +ISO n=5 mice, 54 cells | 1.00     | No          |
| R14 <sup>Δ/Δ</sup> -ISO vs R14 <sup>Δ/Δ</sup> +ISO     | R14 <sup>Δ/Δ</sup> -ISO n=4 mice, 96 cells<br>R14 <sup>Δ/Δ</sup> +ISO n=4 mice, 45 cells  | 6.04E-02 | No          |

**Comparisons Table S4:**

| <b>Comparison</b>                                                                          | <b>Sample size</b>                                                                                                               | <b>P-value</b> | <b>Significant</b> |
|--------------------------------------------------------------------------------------------|----------------------------------------------------------------------------------------------------------------------------------|----------------|--------------------|
| WT versus R14 <sup>Δ/Δ</sup>                                                               | WT n=4 mice, 81 cells<br>R14 <sup>Δ/Δ</sup> n=4 mice, 97 cells                                                                   | 5.50E-01       | No                 |
| WT versus R14 <sup>Δ/Δ</sup> DWORF <sup>Tg</sup>                                           | WT n=4 mice, 81 cells<br>R14 <sup>Δ/Δ</sup> DWORF <sup>Tg</sup> n=4 mice, 87 cells                                               | 1.27E-01       | No                 |
| R14 <sup>Δ/Δ</sup> versus R14 <sup>Δ/Δ</sup> DWORF <sup>Tg</sup>                           | R14 <sup>Δ/Δ</sup> n=4 mice, 97 cells<br>R14 <sup>Δ/Δ</sup> DWORF <sup>Tg</sup> n=4 mice, 87 cells                               | 1.00           | No                 |
| WT-ISO versus WT+ISO                                                                       | WT-ISO n=4 mice, 81 cells<br>WT+ISO n=4 mice, 29 cells                                                                           | 1.17E-03       | Yes                |
| R14 <sup>Δ/Δ</sup> -ISO versus R14 <sup>Δ/Δ</sup> +ISO                                     | R14 <sup>Δ/Δ</sup> -ISO n=4 mice, 97 cells<br>R14 <sup>Δ/Δ</sup> +ISO n=4 mice, 42 cells                                         | 2.81E-02       | Yes                |
| R14 <sup>Δ/Δ</sup> DWORF <sup>Tg</sup> -ISO vs R14 <sup>Δ/Δ</sup> DWORF <sup>Tg</sup> +ISO | R14 <sup>Δ/Δ</sup> DWORF <sup>Tg</sup> -ISO n=4 mice, 87 cells<br>R14 <sup>Δ/Δ</sup> DWORF <sup>Tg</sup> +ISO n=4 mice, 35 cells | 5.25E-01       | No                 |
