# Supplementary material for: DWORF Extends Life Span in a PLN-R14del Cardiomyopathy Mouse Model by Reducing Abnormal Sarcoplasmic Reticulum Clusters
Source: PubMed Central journal article supplement — Circ Res. 2023 Nov 13;133(12):1006–21. doi: 10.1161/CIRCRESAHA.123.323304 (PMC10699510; doi:10.1161/circresaha.123.323304), 2023-11-13
Supplement: res-133-1006-s005.pdf [file res-133-1006-s005.pdf]

Full unedited gel for Figure 4C

WT WT R14<sup>ΔΔ</sup> R14<sup>ΔΔ</sup> R14<sup>ΔΔ</sup>DWORF<sup>T9</sup> R14<sup>ΔΔ</sup>DWORF<sup>T9</sup> WT WT R14<sup>ΔΔ</sup>DWORF<sup>T9</sup> R14<sup>ΔΔ</sup>DWORF<sup>T9</sup>

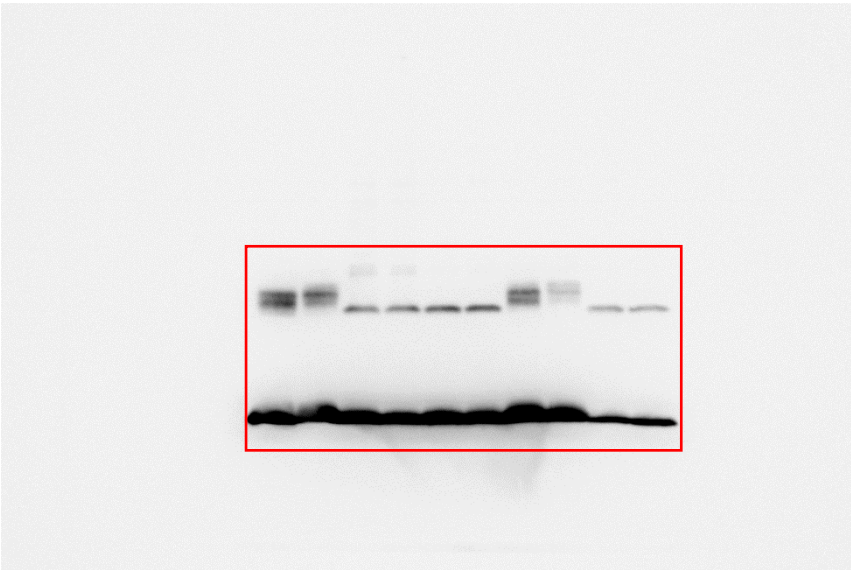

PLN pentamer (25 kDa)

PLN monomer (6 kDa)

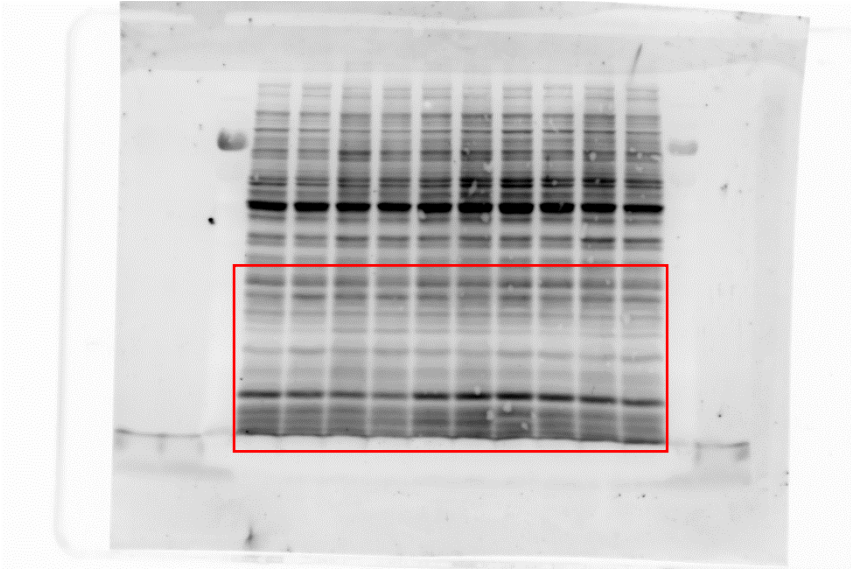

Total protein stain

Full unedited gel for Figure S1C

WT  
WT  
R14<sup>ΔΔ</sup>  
R14<sup>ΔΔ</sup>  
R14<sup>ΔΔ</sup>DWORF<sup>Tg</sup> 1:5  
R14<sup>ΔΔ</sup>DWORF<sup>Tg</sup> 1:5

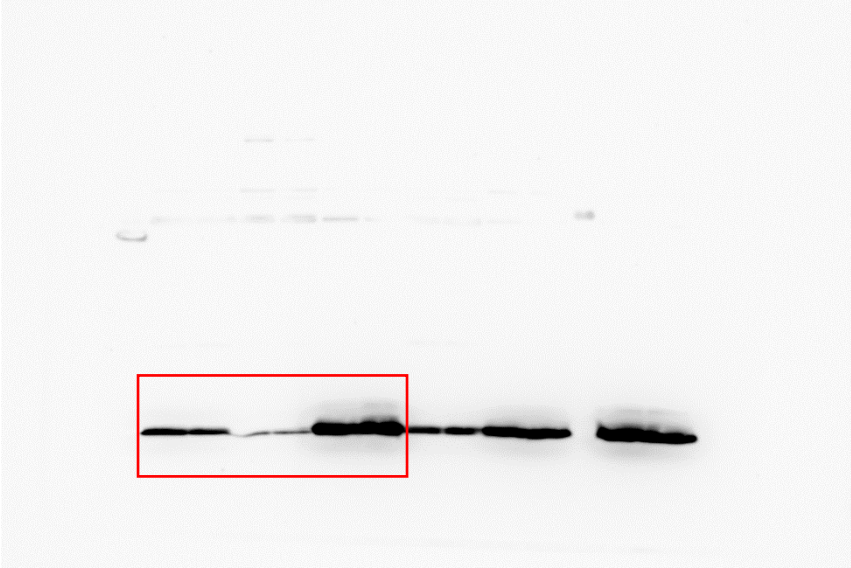

DWORF (4 kDa)

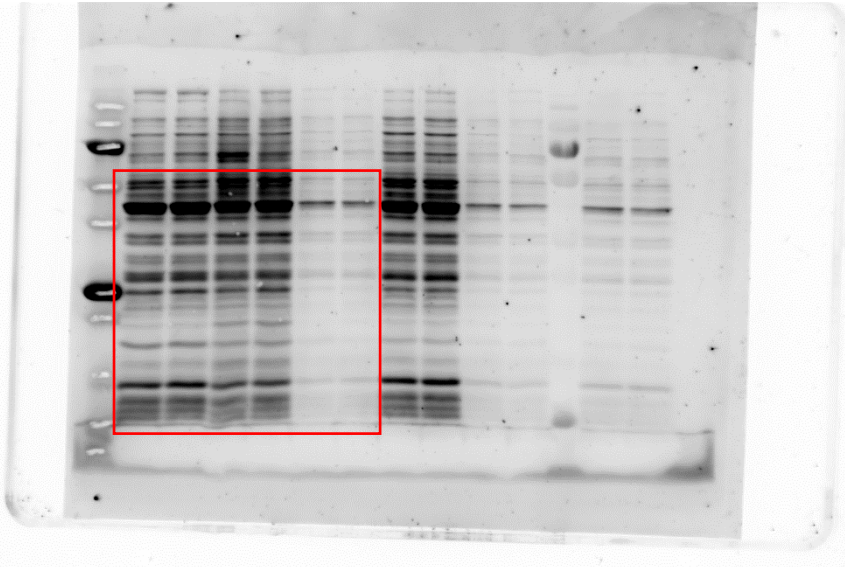

Total protein stain

Full unedited gel for Figure S13C

WT  
WT  
R14<sup>Δ/Δ</sup>  
R14<sup>Δ/Δ</sup>  
R14<sup>Δ/Δ</sup>DWORF<sup>Tg</sup>  
R14<sup>Δ/Δ</sup>DWORF<sup>Tg</sup>

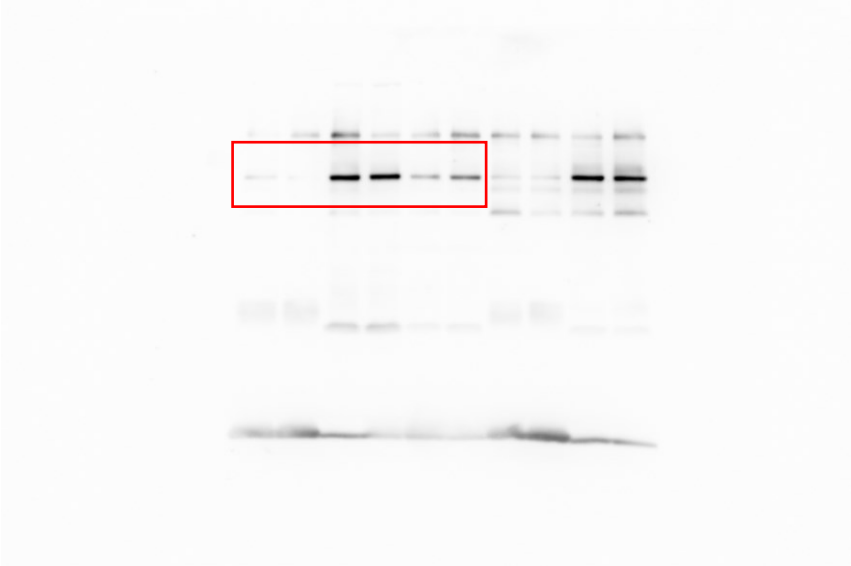

P62 (62 kDa)

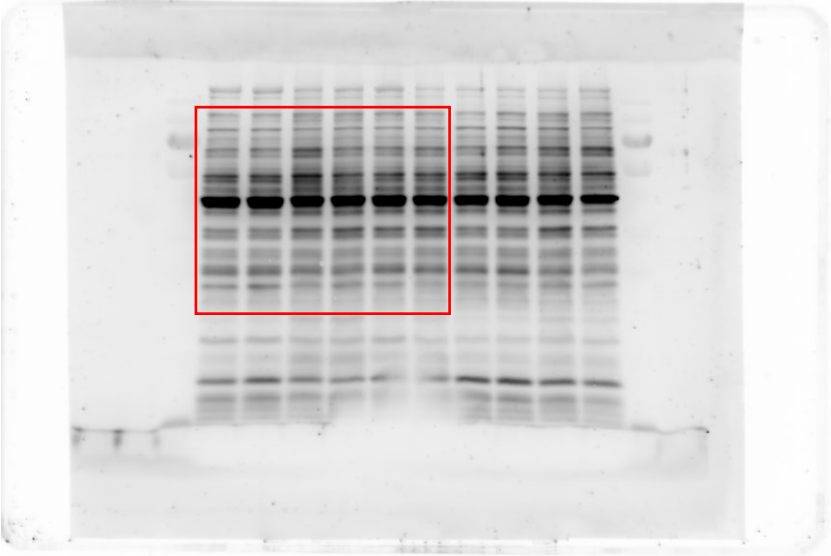

Total protein stain
